# Supplementary material for: Association analyses identify 38 susceptibility loci for inflammatory bowel disease and highlight shared genetic risk across populations
Source: Springer Nature journal article supplement (doi:10.1038/ng.3359), 2015-07-20

**Supplementary Figure 7.** Regional association plots of novel risk loci.

At each locus, the phenotype with the largest MANTRA  $\log_{10}BF$  is represented. The first four panels represent the per-population association signals. In Europeans, this consisted of a GWAS + ImmunoChip meta-analysis, while non-Europeans include only ImmunoChip samples. In the European panel, when an associated locus does not reside in an ImmunoChip high density region, association results from just the GWAS are plotted as hollow circles. The lead SNP in each region is represented by the large red circle. LD ( $r^2$ ) values relative to the lead SNP were estimated directly from the controls in each population separately. The fifth panel represents the MANTRA meta-analysis results. Recombination rates were obtained from the International HapMap Project Phase II. Gene positions were obtained from GENCODE Release 19.

EUR: rs1748195 CD

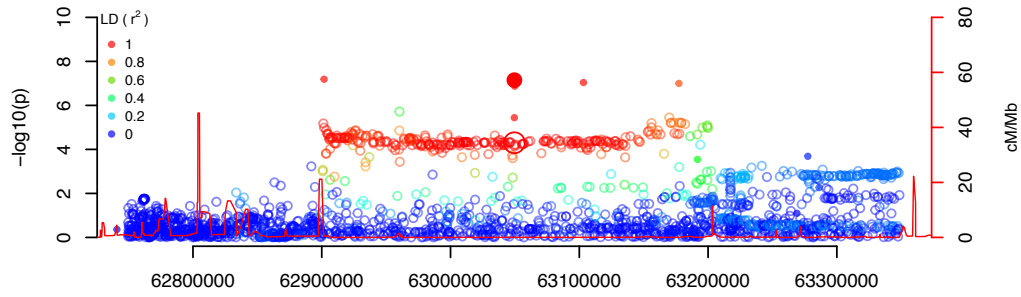

EAS: rs1748195 CD

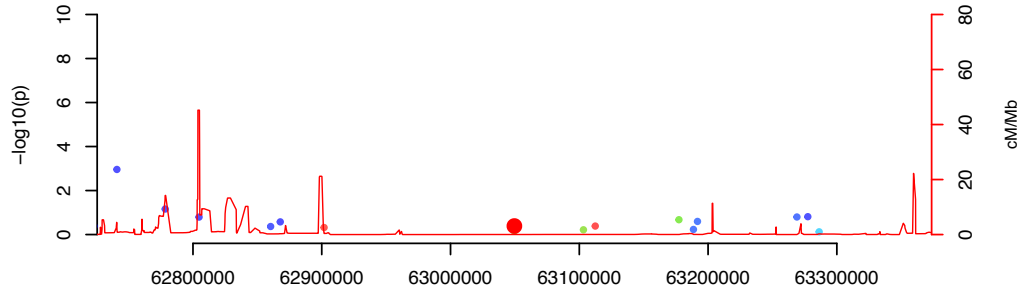

IND: rs1748195 CD

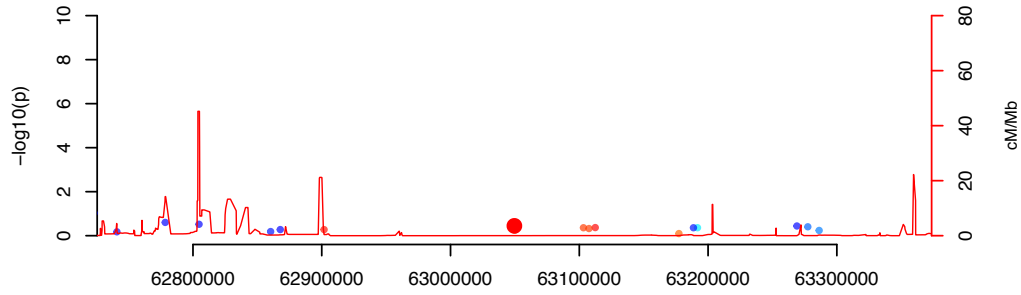

IRA: rs1748195 CD

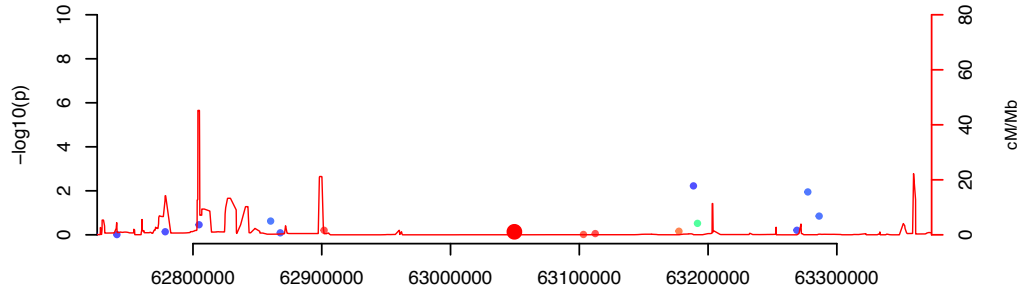

MANTRA meta-analysis: rs1748195 CD

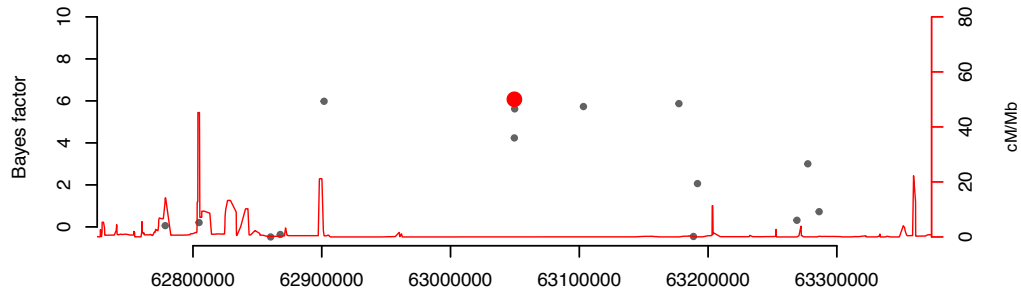

||||| KANK4

||||| USP1

||| ANGPTL3  
| AL138847.1  
| DOCK7

||| ATG4C

EUR: rs34856868 IBD

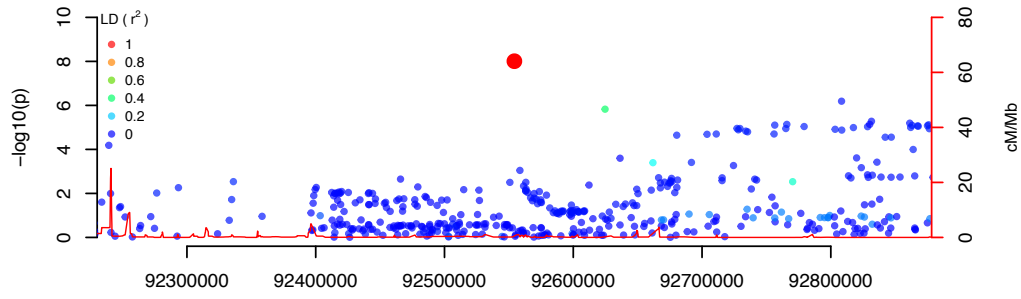

EAS: rs34856868 IBD

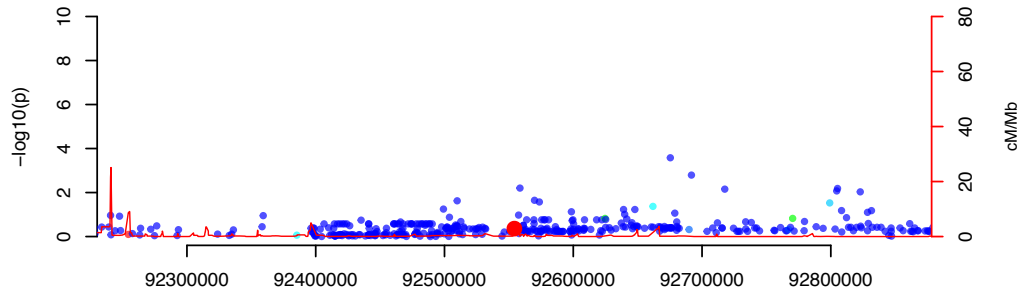

IND: rs34856868 IBD

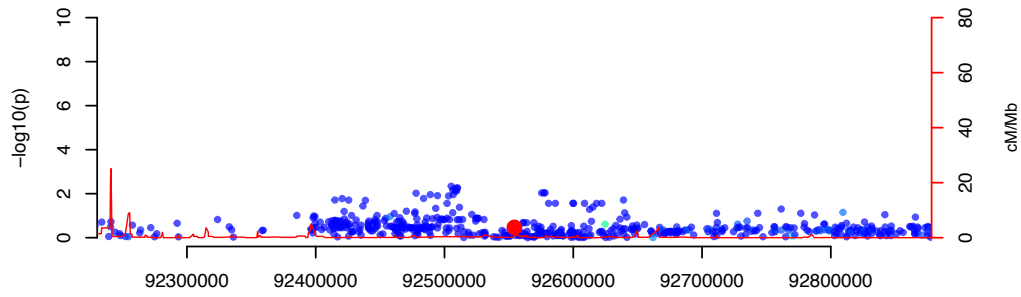

IRA: rs34856868 IBD

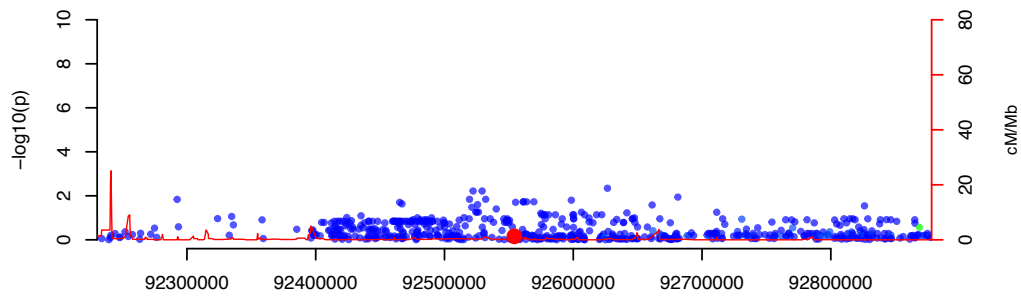

MANTRA meta-analysis: rs34856868 IBD

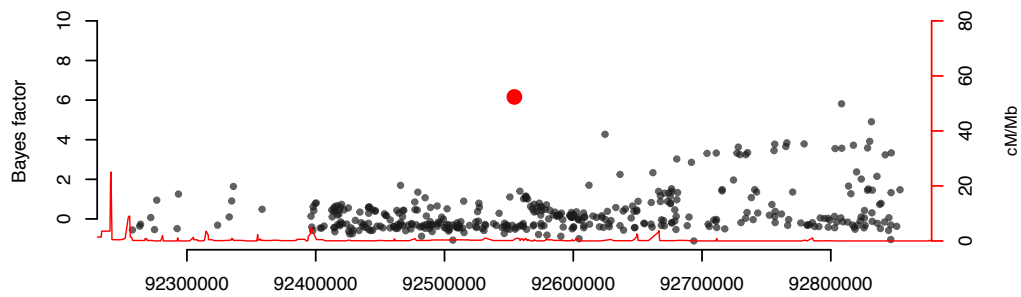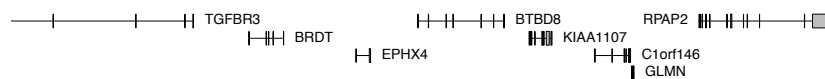

EUR: rs11583043 UC

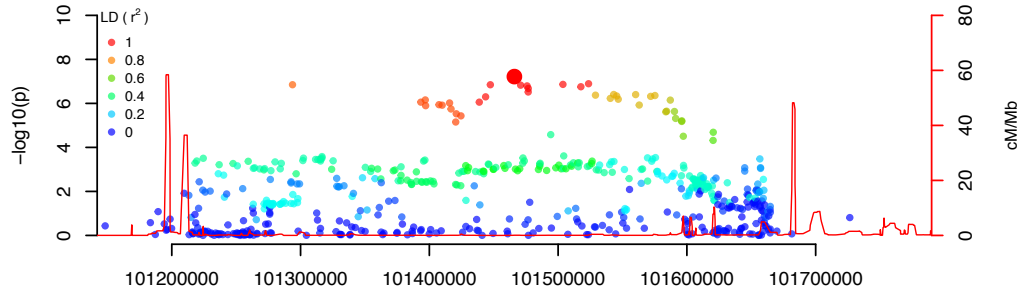

EAS: rs11583043 UC

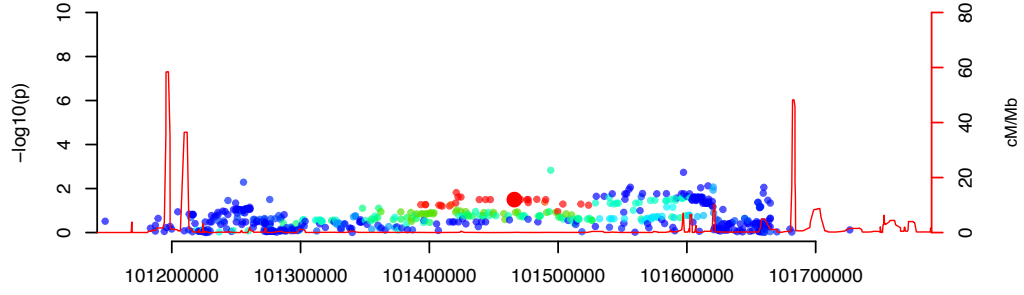

IND: rs11583043 UC

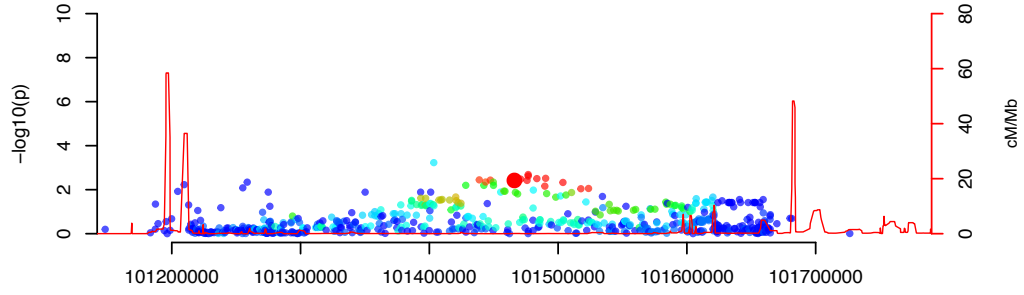

IRA: rs11583043 UC

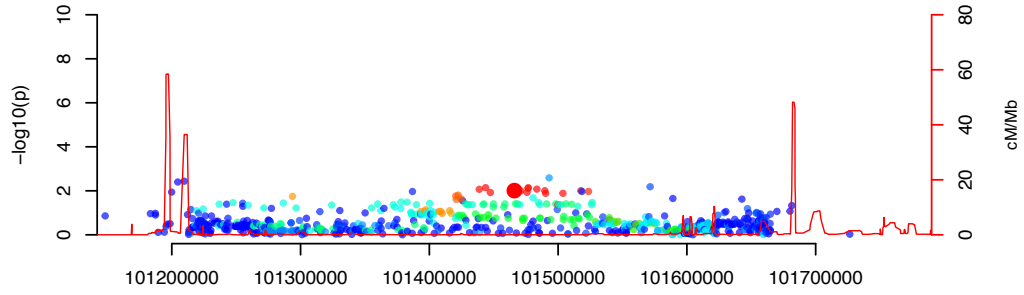

MANTRA meta-analysis: rs11583043 UC

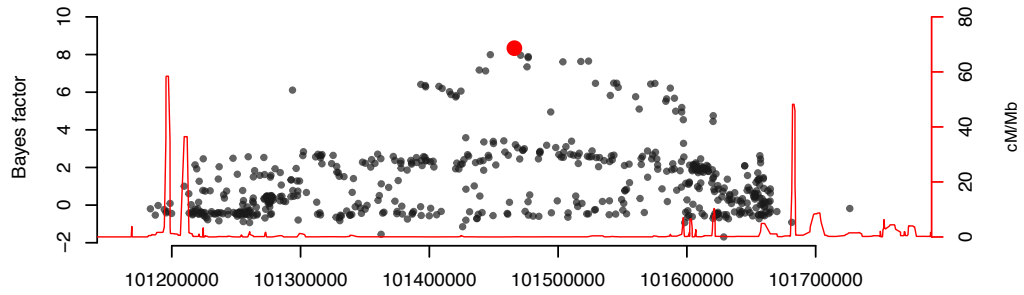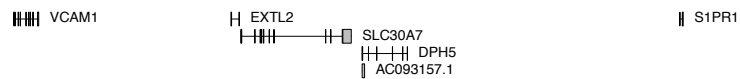

EUR: rs6025 IBD

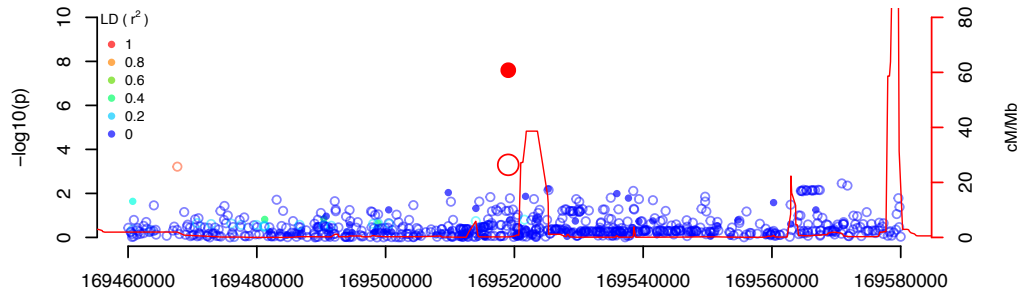

EAS: rs6025 IBD

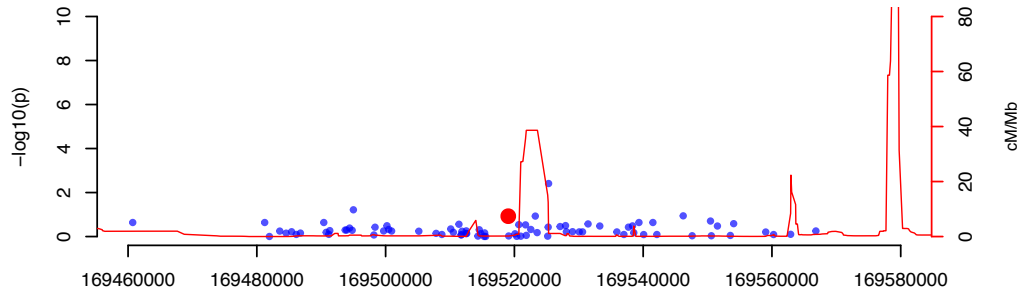

IND: rs6025 IBD

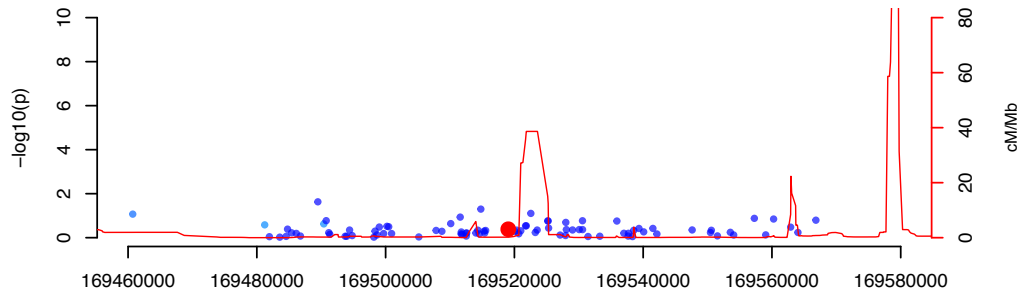

IRA: rs6025 IBD

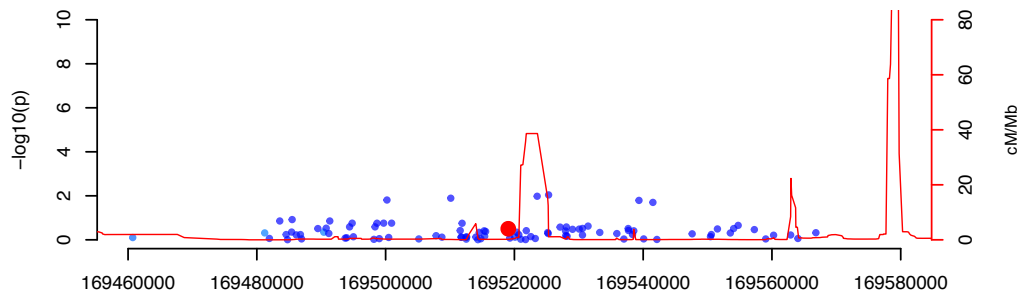

MANTRA meta-analysis: rs6025 IBD

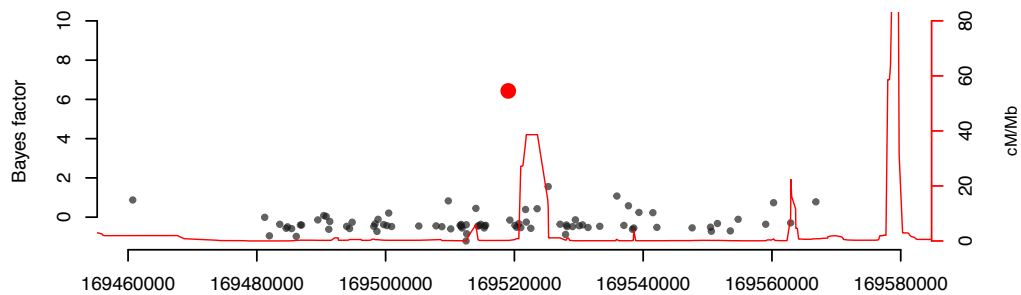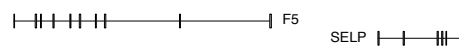

EUR: rs10798069 CD

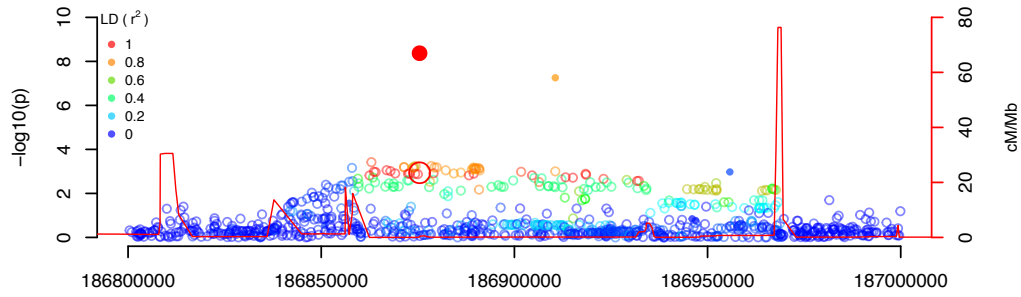

EAS: rs10798069 CD

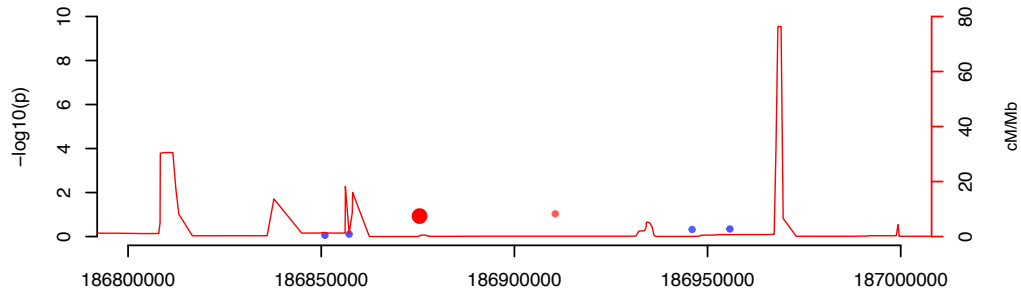

IND: rs10798069 CD

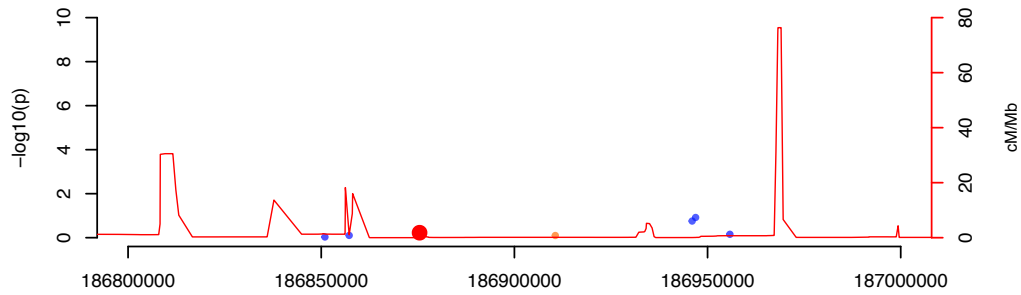

IRA: rs10798069 CD

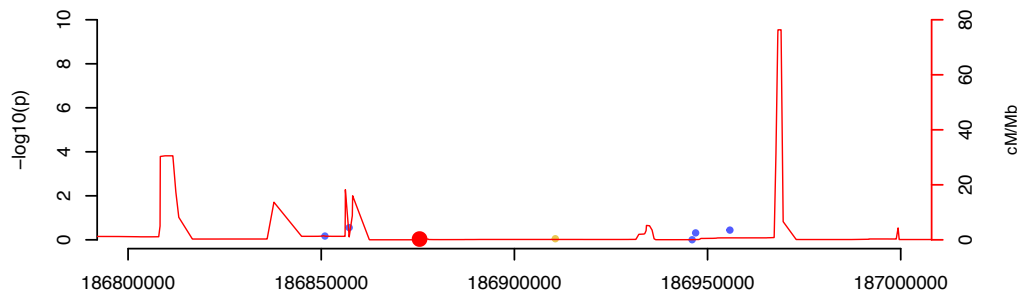

MANTRA meta-analysis: rs10798069 CD

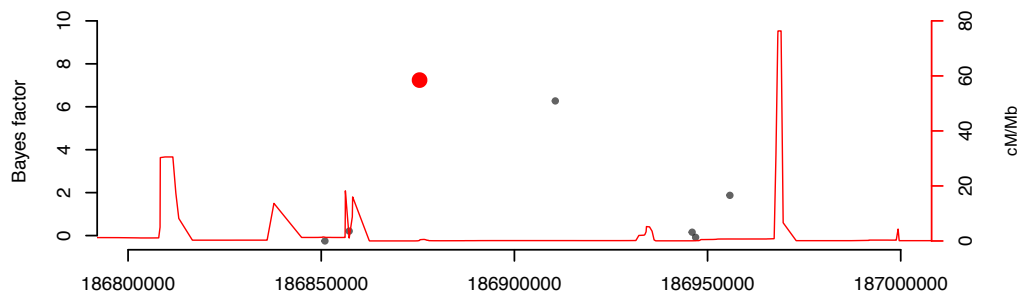

PLA2G4A

EUR: rs7555082 CD

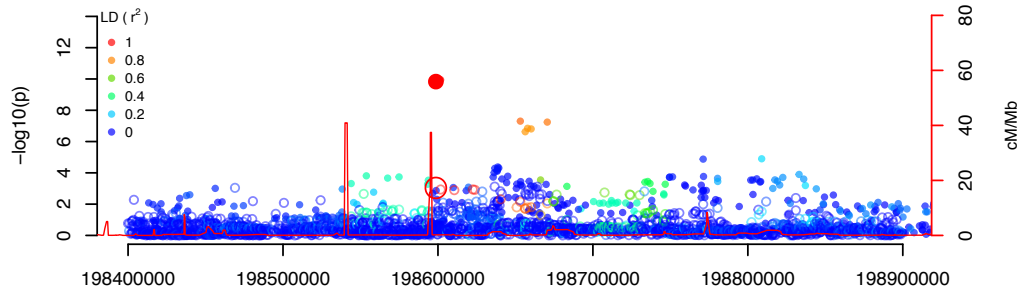

EAS: rs7555082 CD

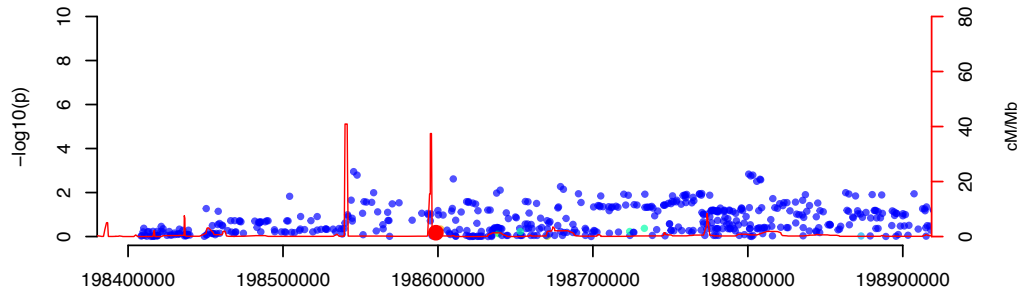

IND: rs7555082 CD

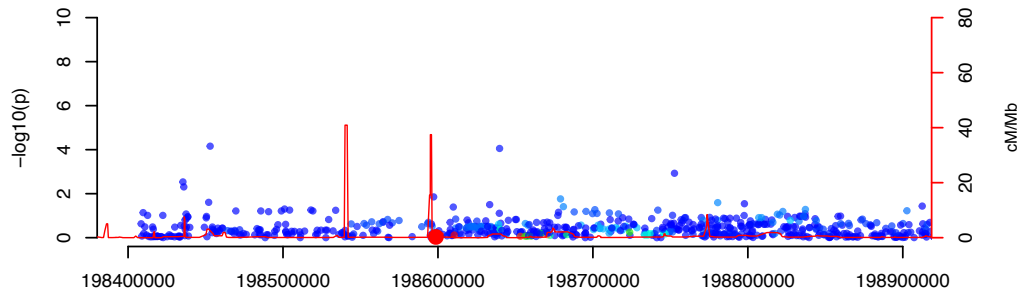

IRA: rs7555082 CD

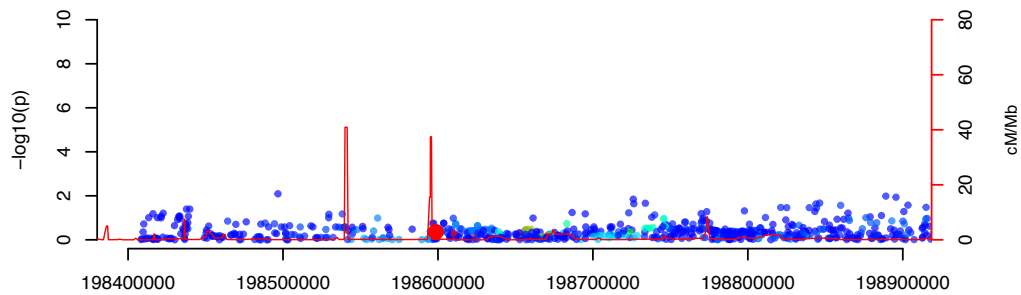

MANTRA meta-analysis: rs7555082 CD

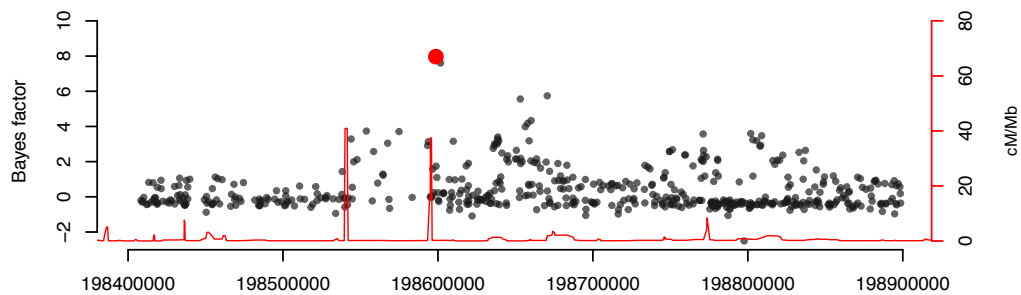

||| ATP6V1G3 |-----| PTPRC

EUR: rs11681525 CD

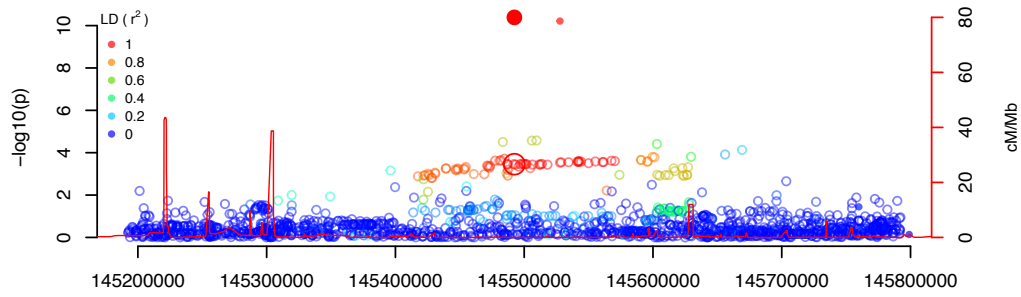

EAS: rs11681525 CD

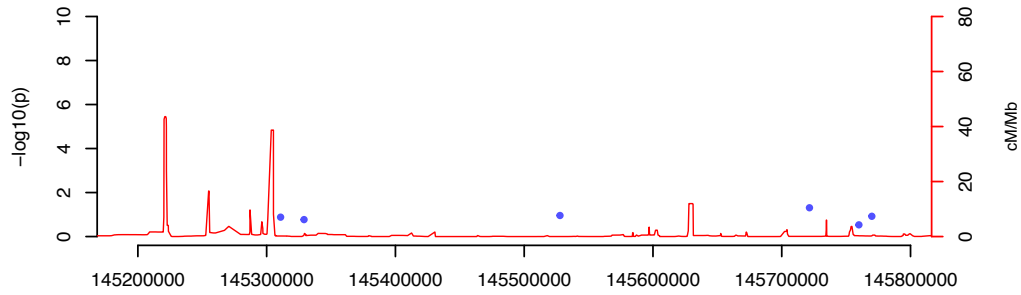

IND: rs11681525 CD

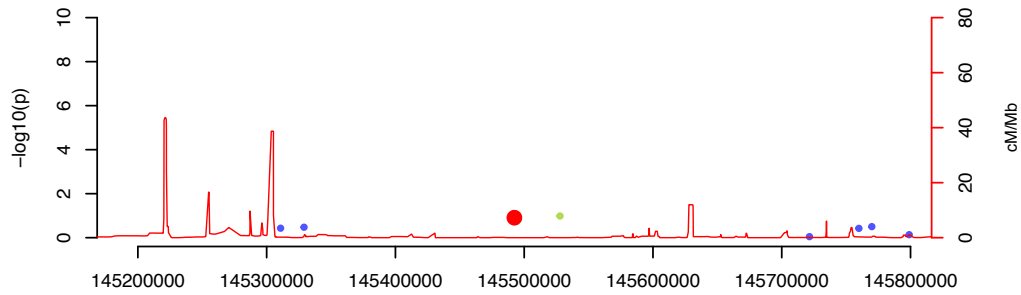

IRA: rs11681525 CD

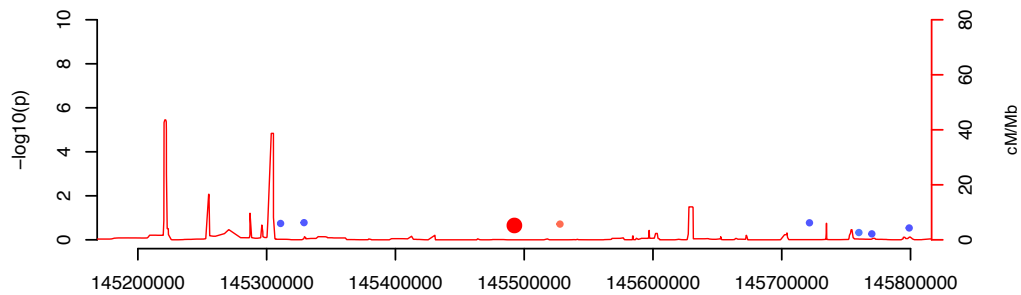

MANTRA meta-analysis: rs11681525 CD

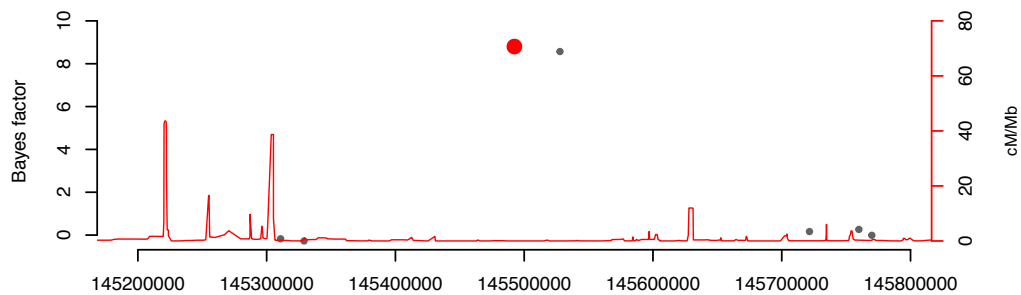

ZEB2



EUR: rs4664304 IBD

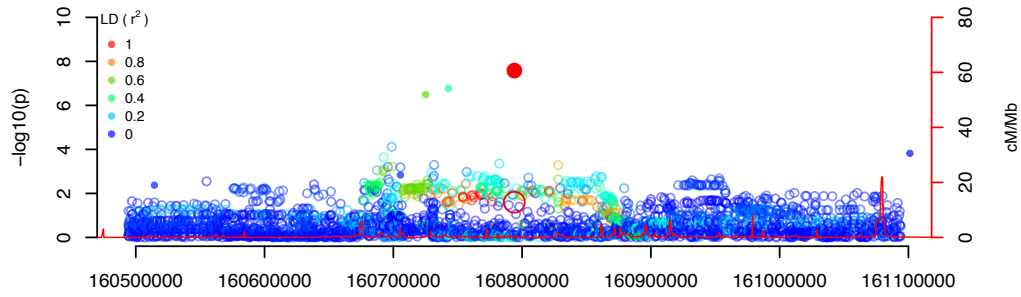

EAS: rs4664304 IBD

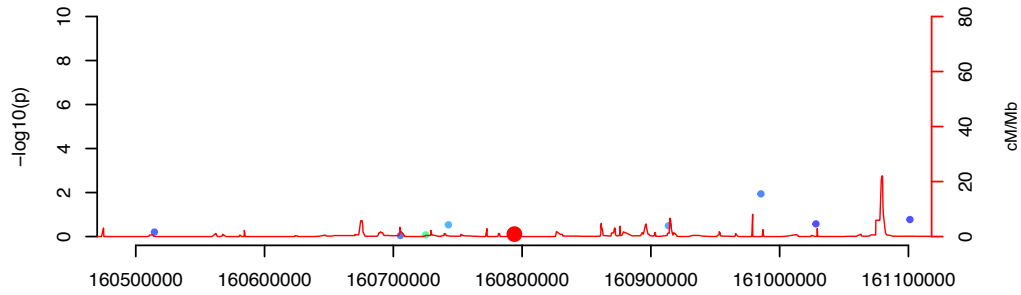

IND: rs4664304 IBD

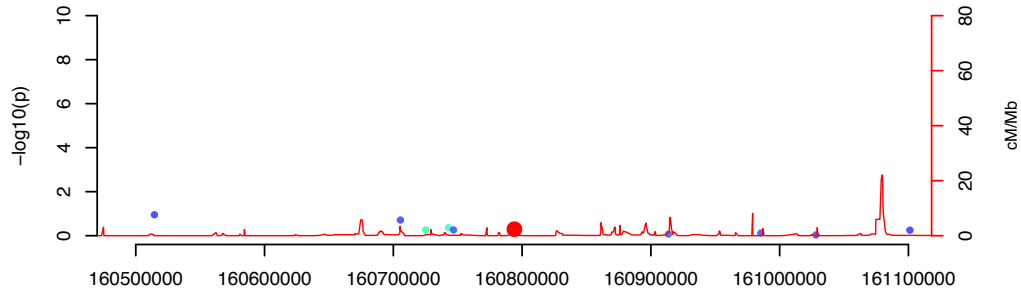

IRA: rs4664304 IBD

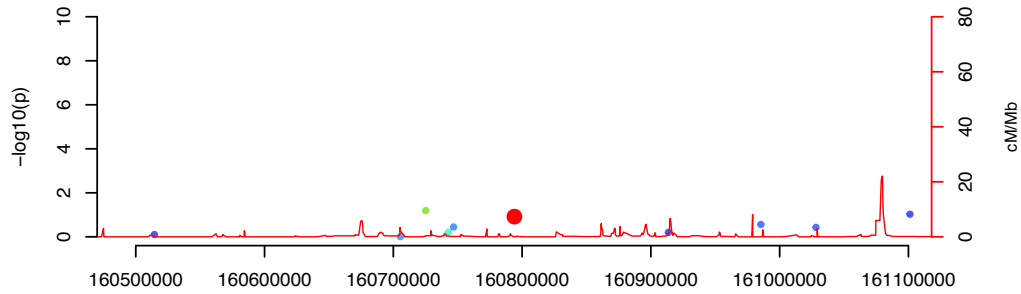

MANTRA meta-analysis: rs4664304 IBD

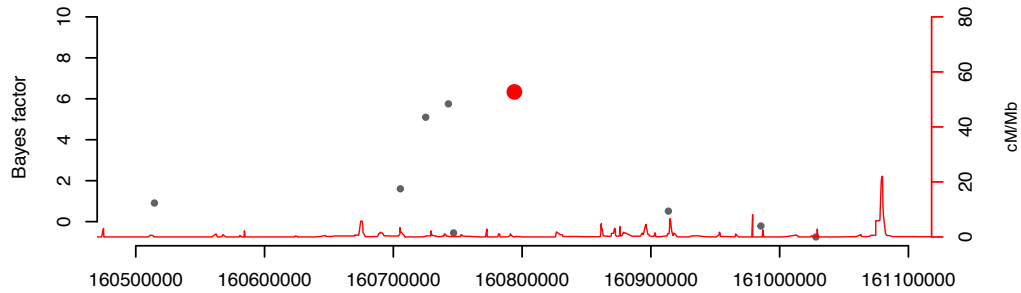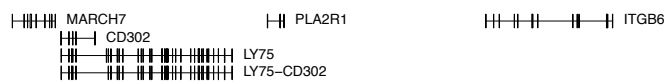

EUR: rs3116494 UC

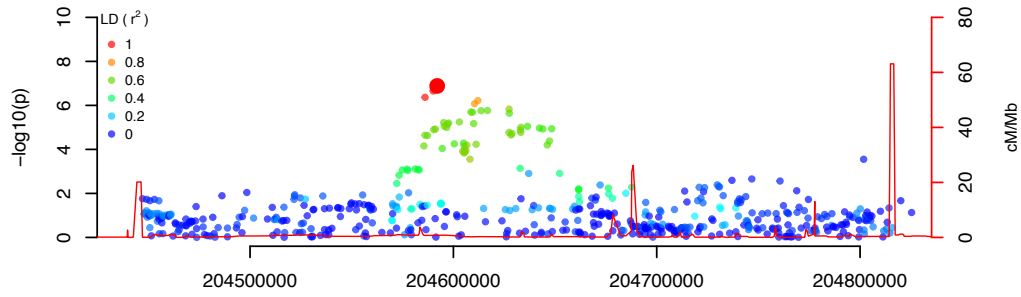

EAS: rs3116494 UC

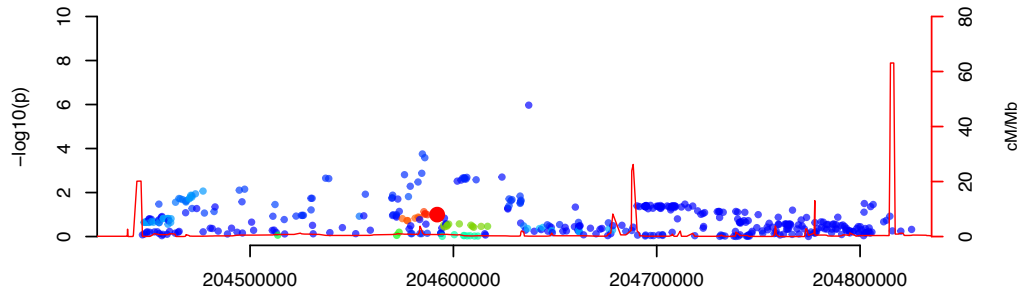

IND: rs3116494 UC

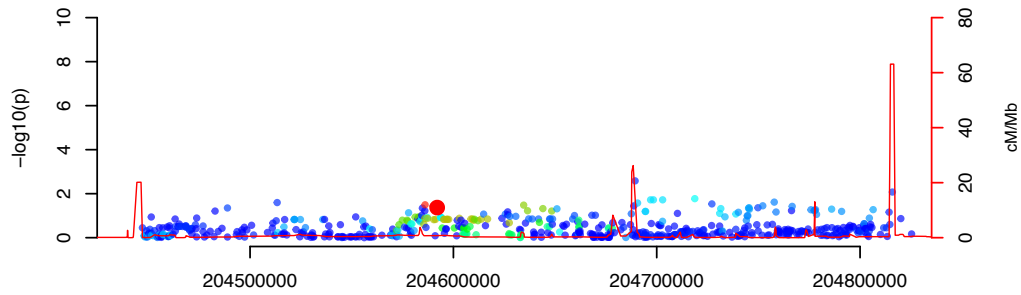

IRA: rs3116494 UC

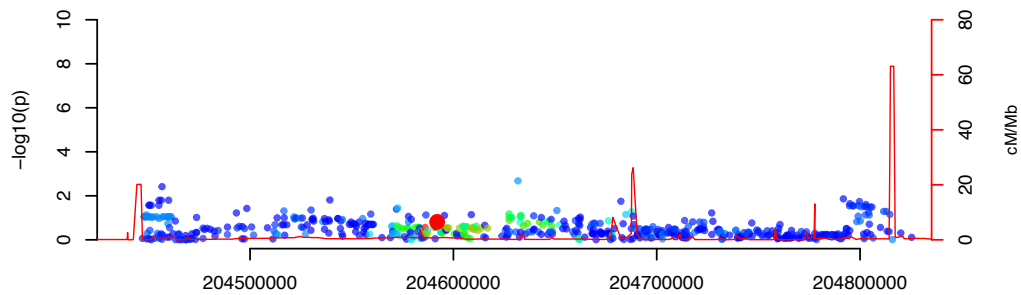

MANTRA meta-analysis: rs3116494 UC

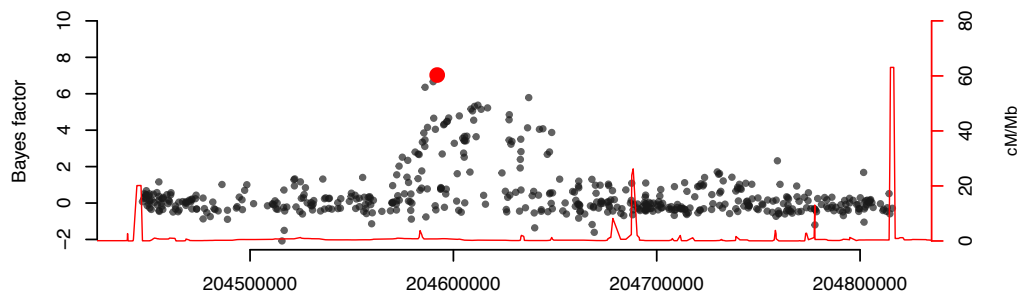

CD28

CTLA4 ICOS

EUR: rs111781203 IBD

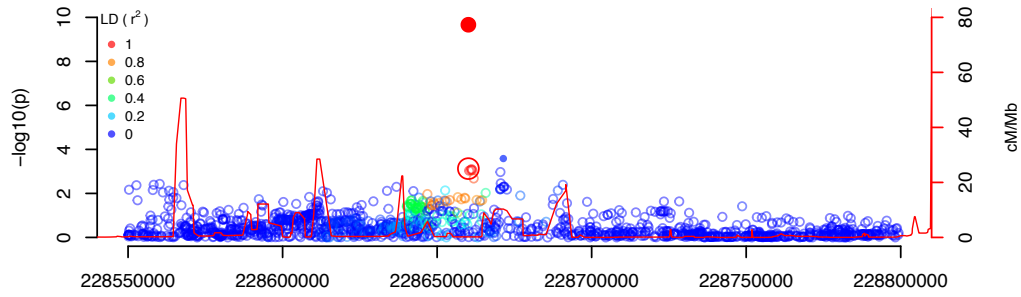

EAS: rs111781203 IBD

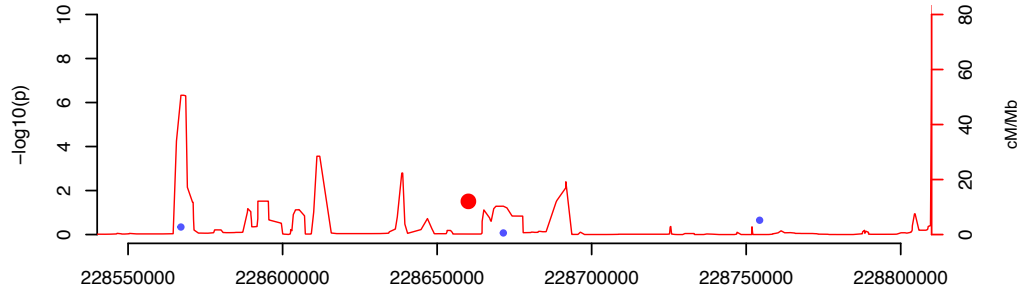

IND: rs111781203 IBD

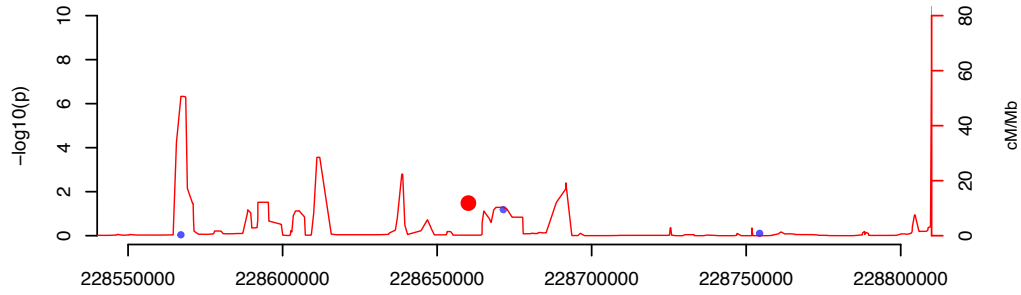

IRA: rs111781203 IBD

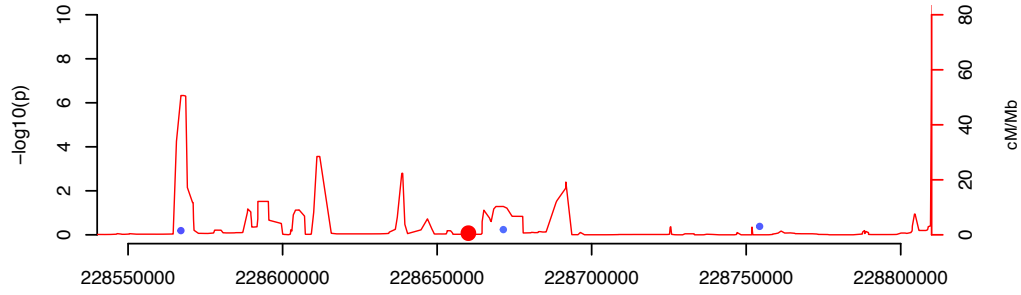

MANTRA meta-analysis: rs111781203 IBD

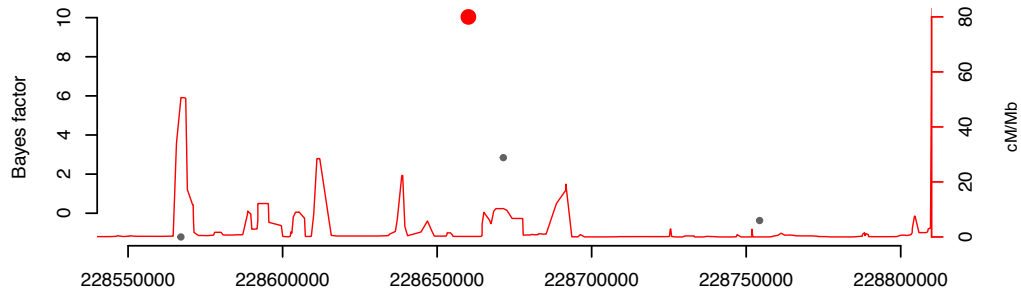

SLC19A3

CCL20

DAW1

EUR: rs35320439 CD

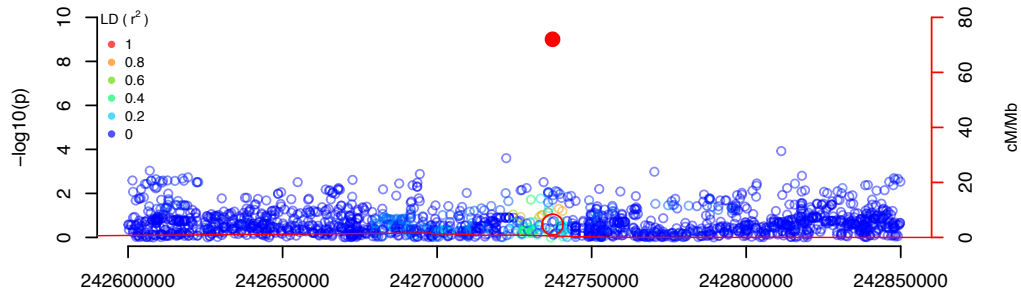

EAS: rs35320439 CD

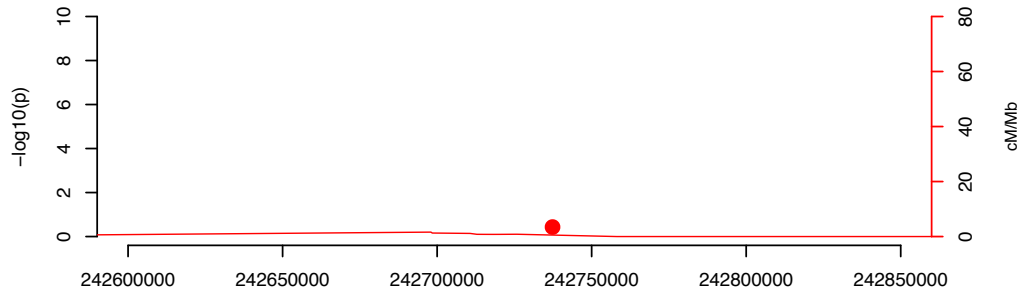

IND: rs35320439 CD

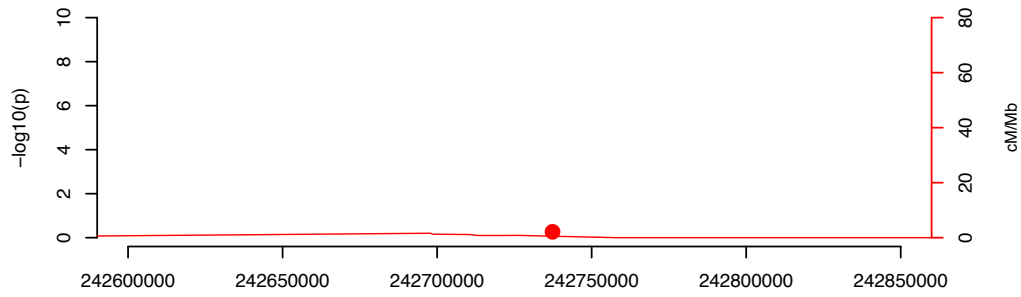

IRA: rs35320439 CD

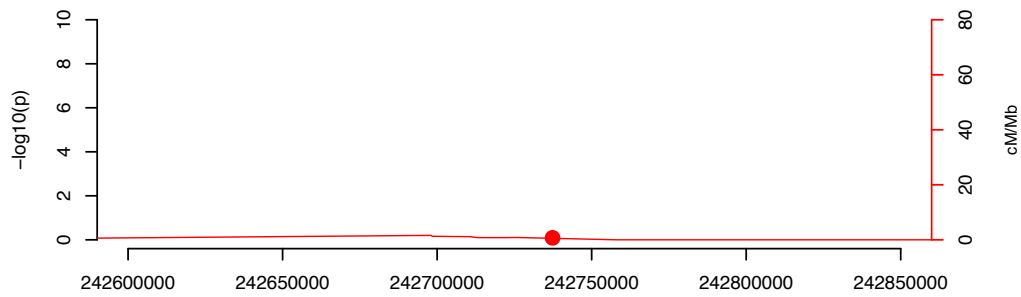

MANTRA meta-analysis: rs35320439 CD

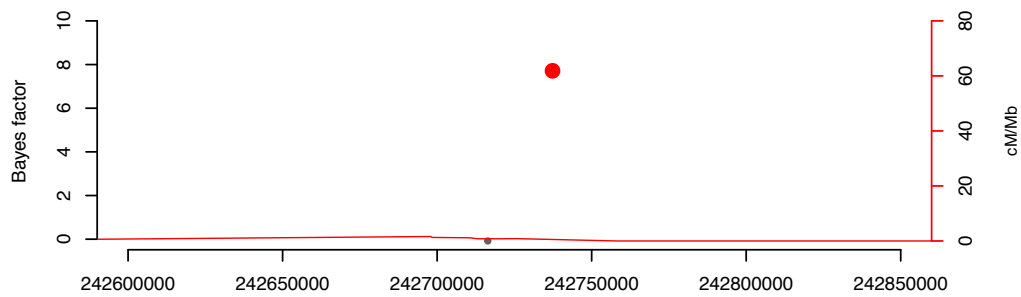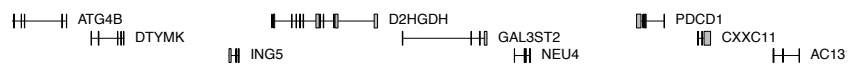



EUR: rs616597 UC

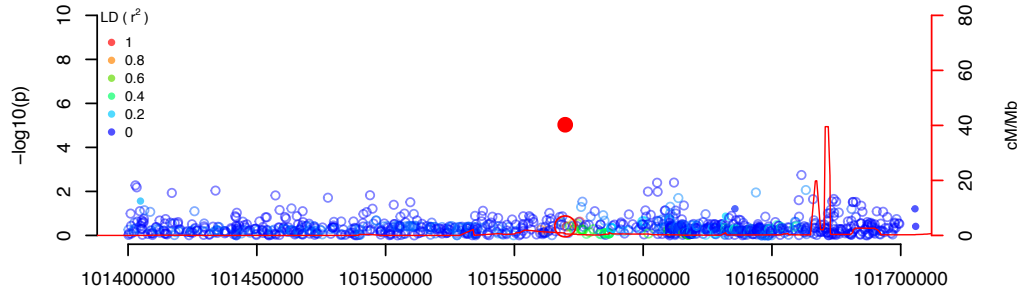

EAS: rs616597 UC

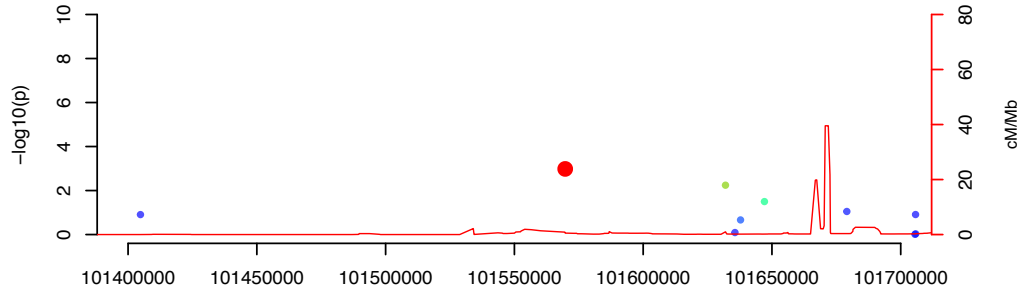

IND: rs616597 UC

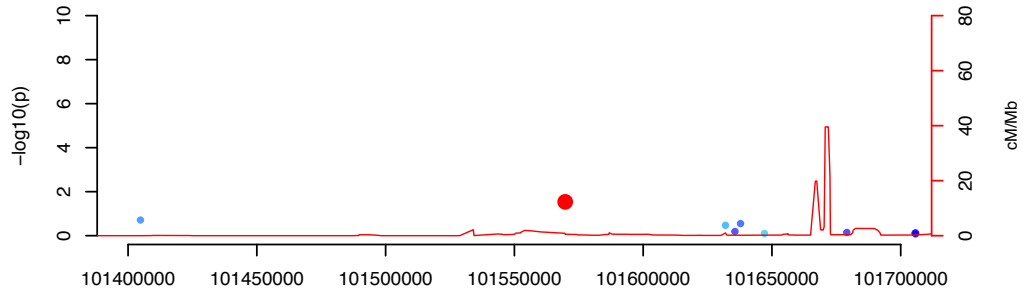

IRA: rs616597 UC

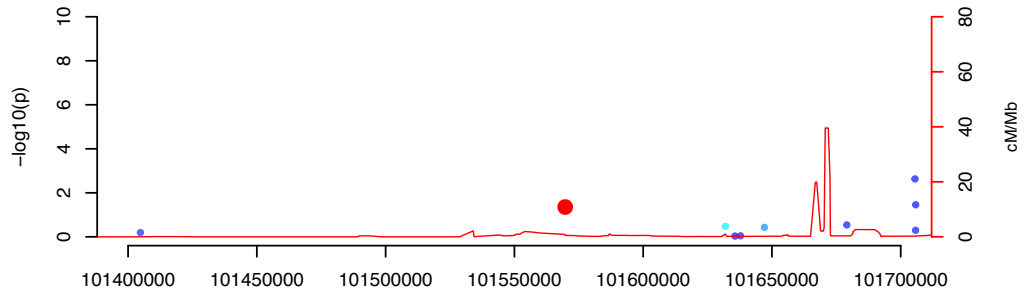

MANTRA meta-analysis: rs616597 UC

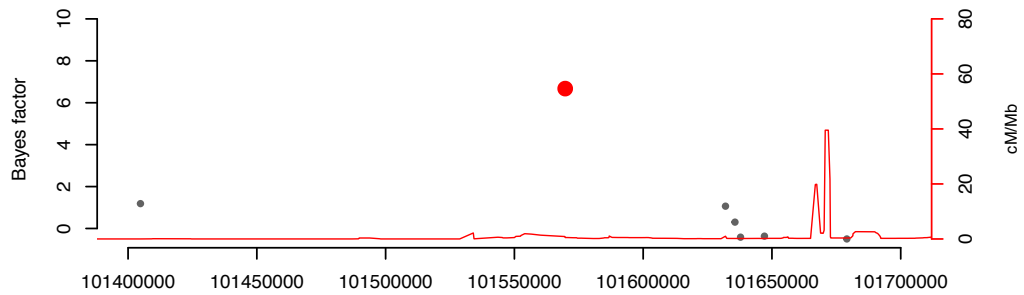

RPL24 CEP97 NFKBIZ  
NXPE3

EUR: rs724016 CD

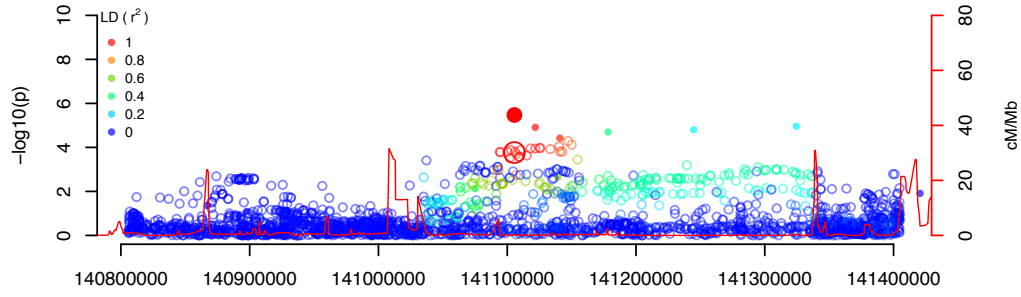

EAS: rs724016 CD

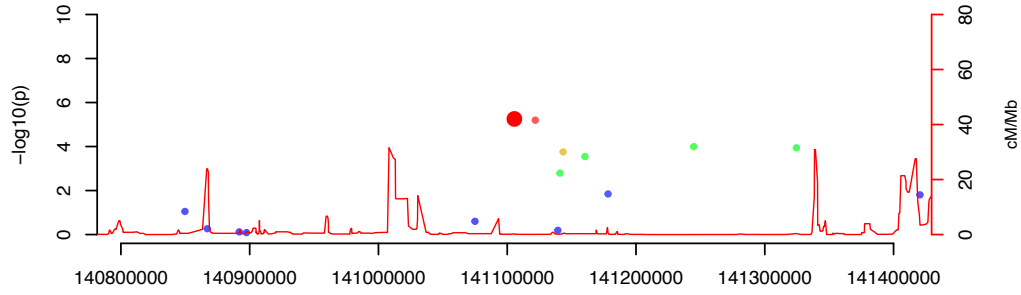

IND: rs724016 CD

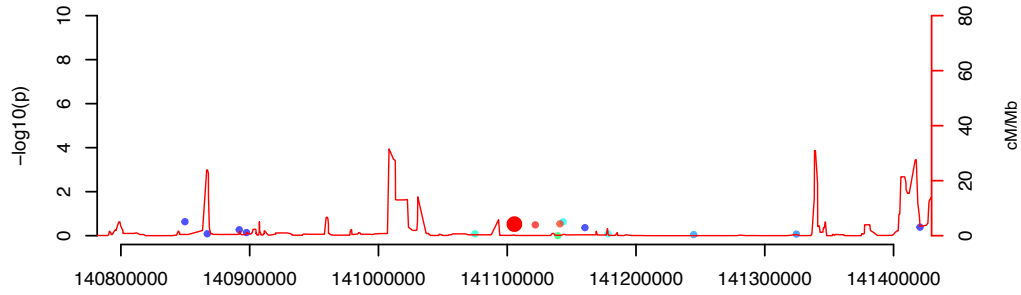

IRA: rs724016 CD

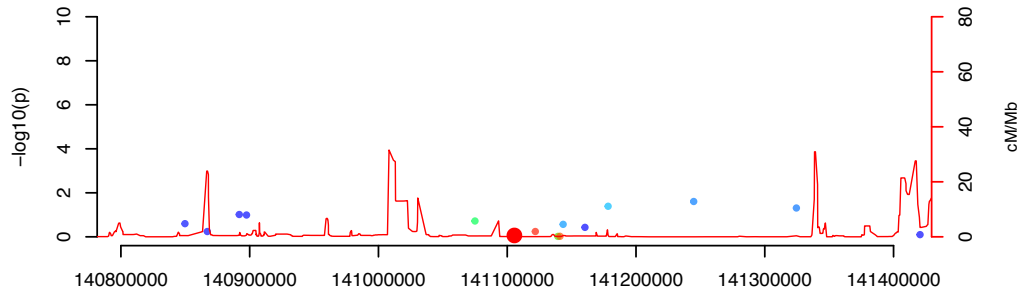

MANTRA meta-analysis: rs724016 CD

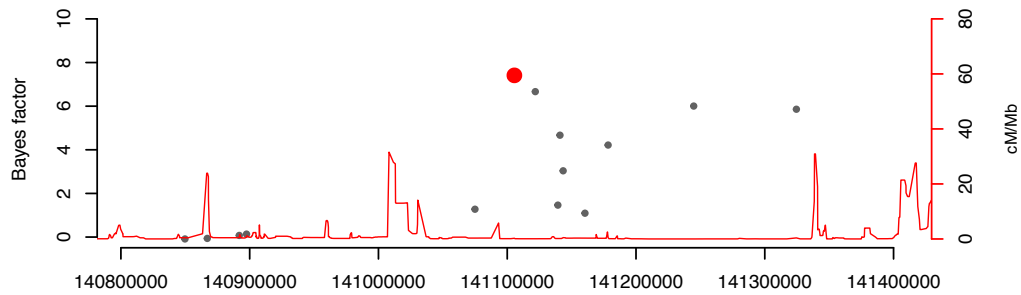

SPSB4 ACPL2 ZBTB38 RASA2

EUR: rs2073505 IBD

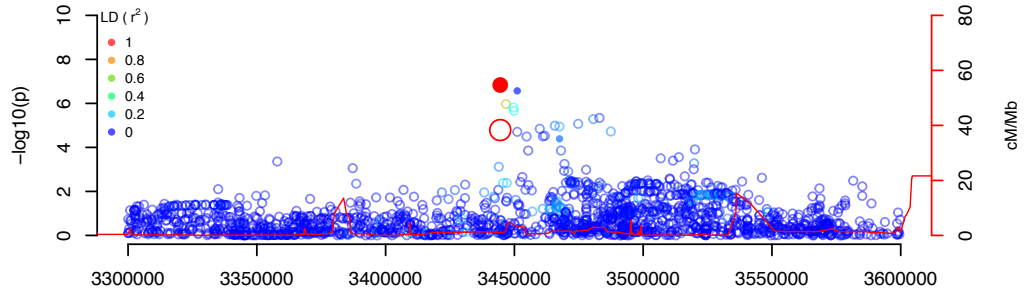

EAS: rs2073505 IBD

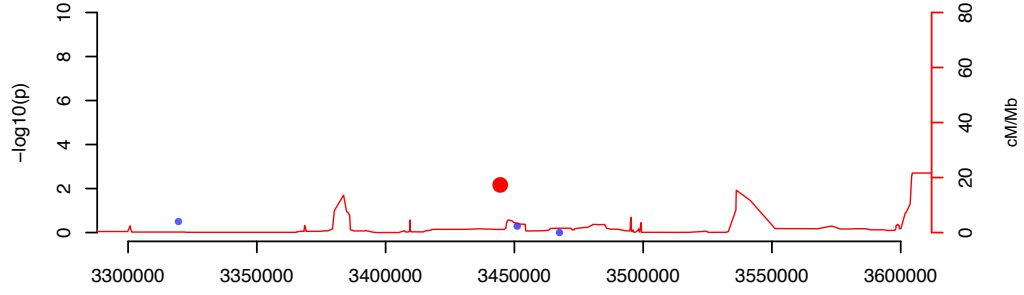

IND: rs2073505 IBD

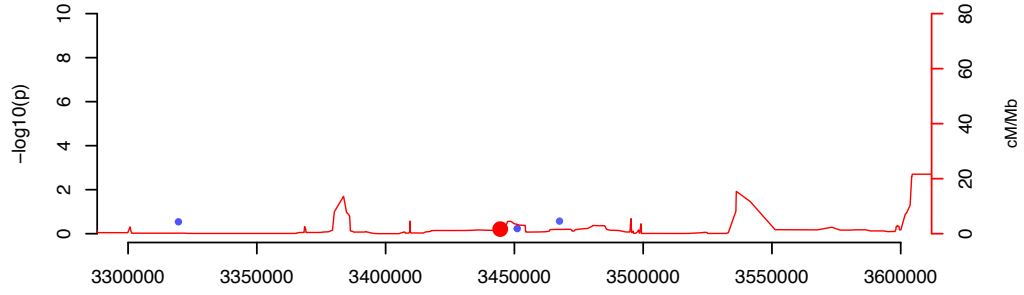

IRA: rs2073505 IBD

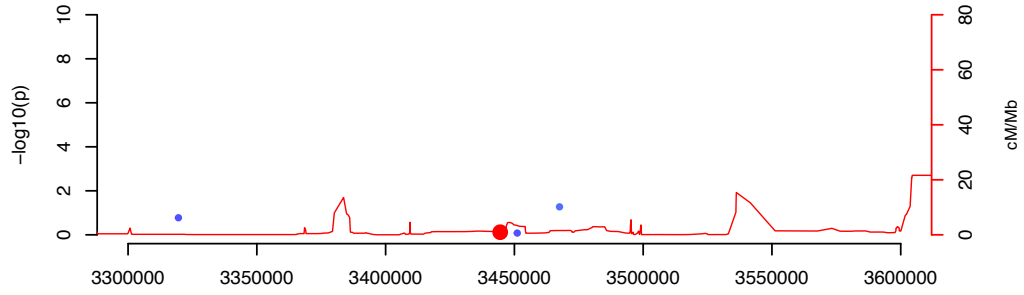

MANTRA meta-analysis: rs2073505 IBD

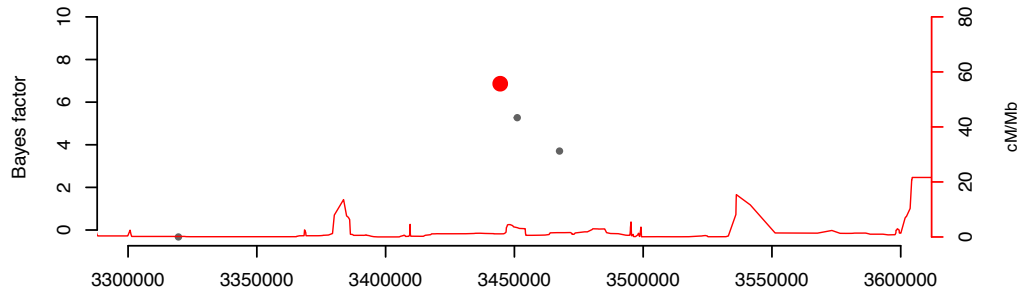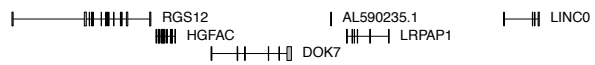



EUR: rs4692386 IBD

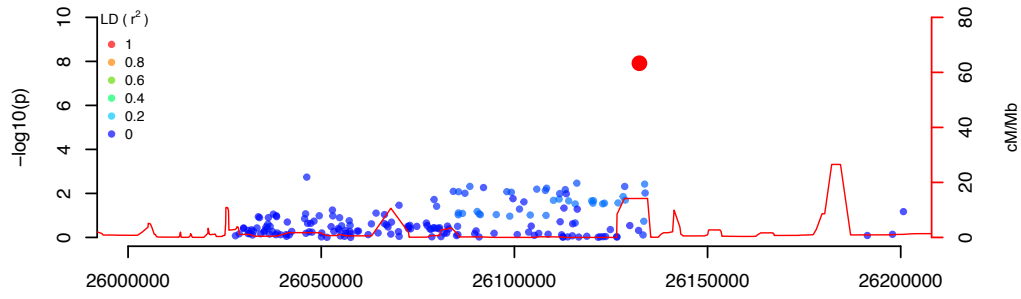

EAS: rs4692386 IBD

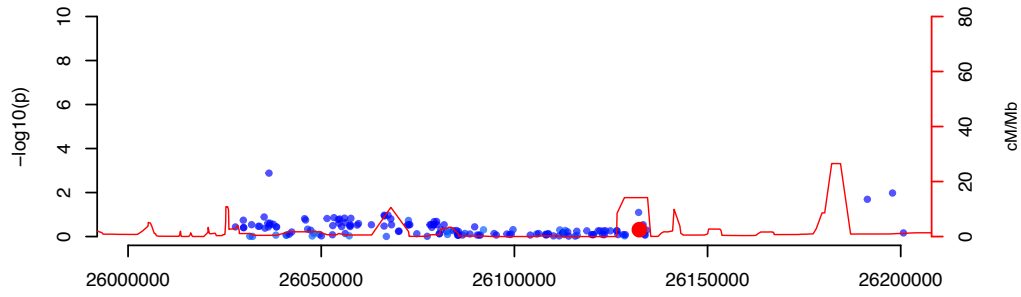

IND: rs4692386 IBD

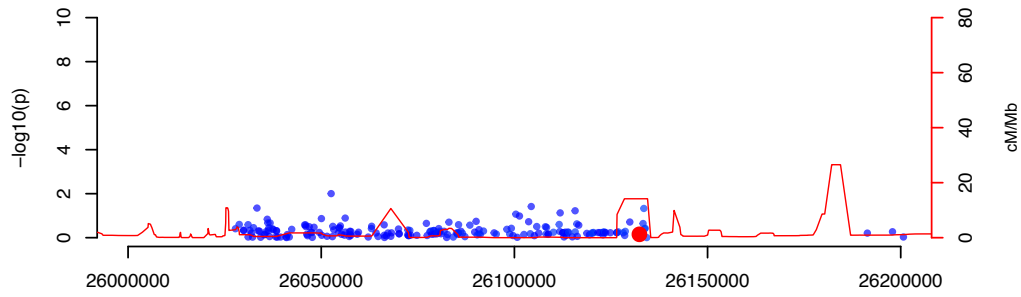

IRA: rs4692386 IBD

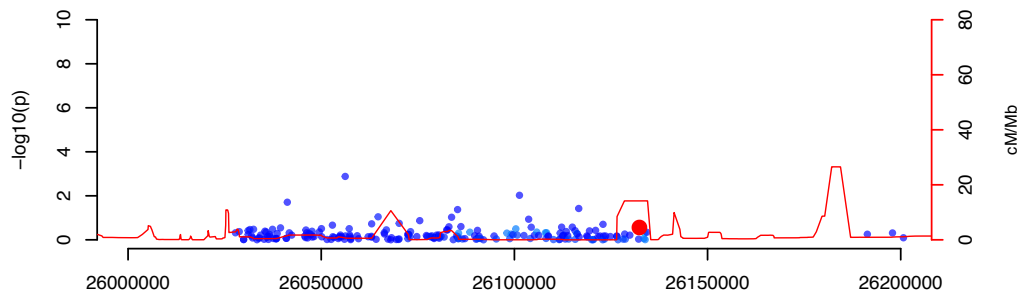

MANTRA meta-analysis: rs4692386 IBD

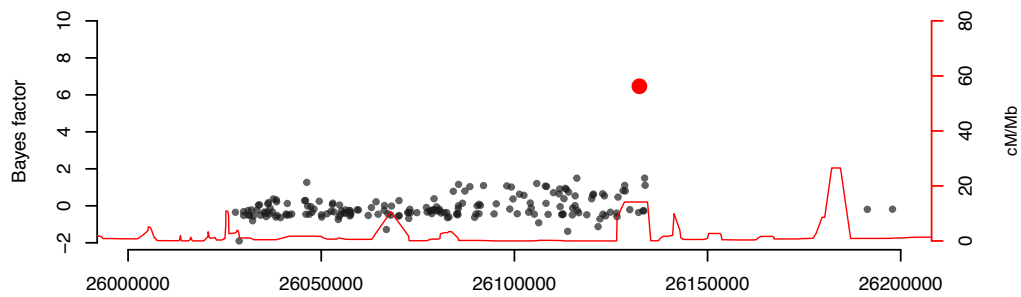

RBPJ |

EUR: rs6856616 IBD

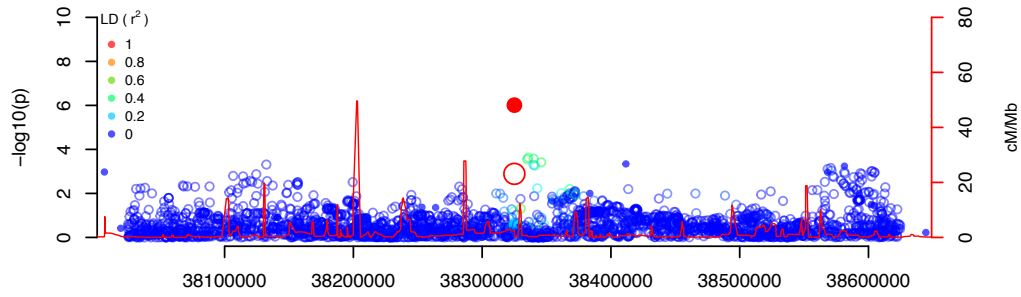

EAS: rs6856616 IBD

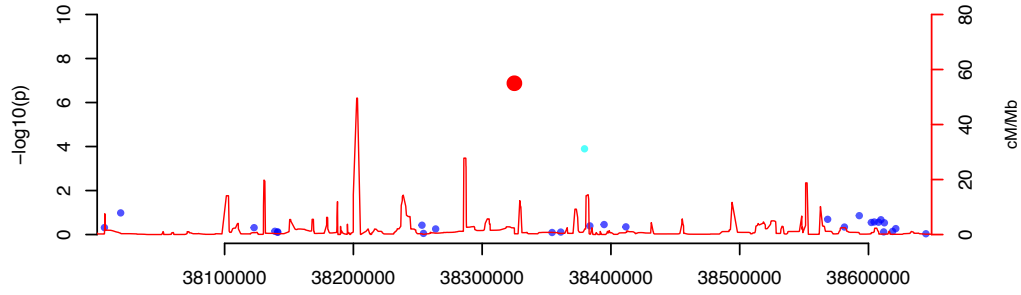

IND: rs6856616 IBD

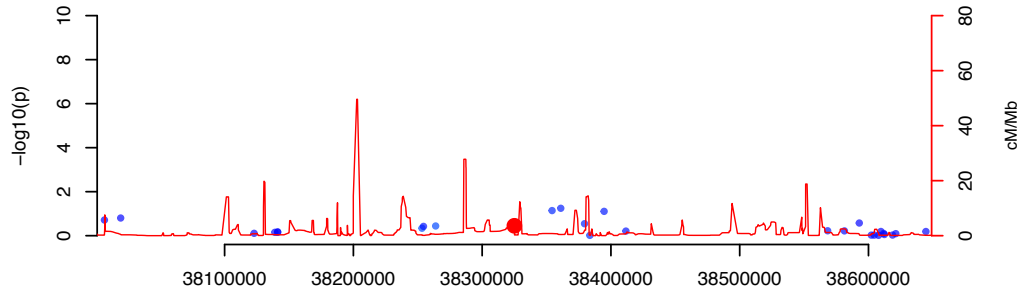

IRA: rs6856616 IBD

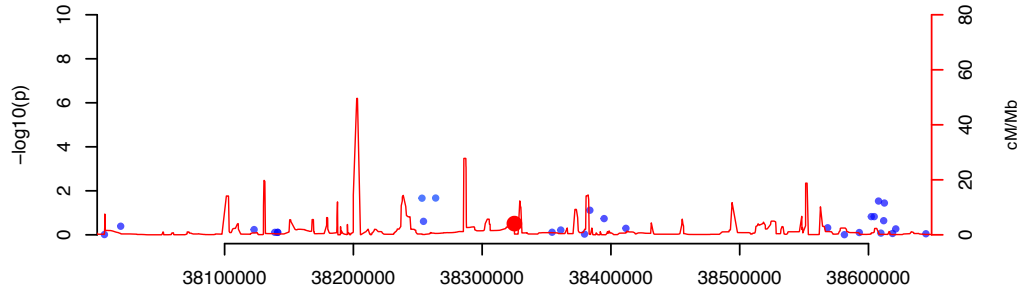

MANTRA meta-analysis: rs6856616 IBD

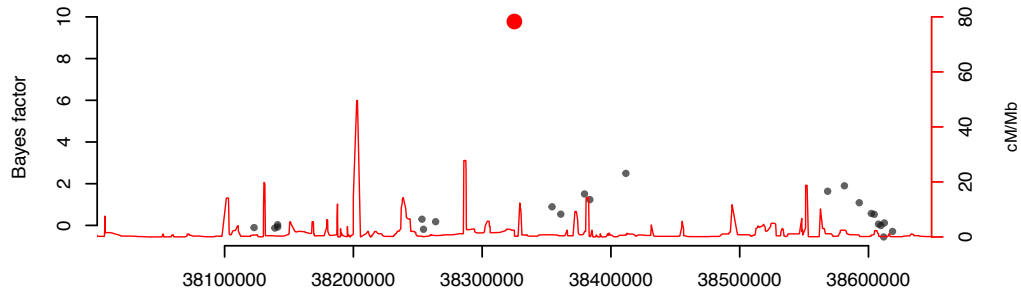

||| TBC1D1



EUR: rs395157 IBD

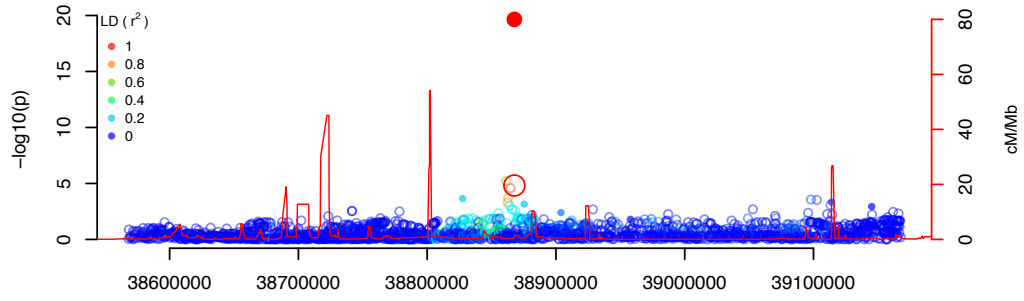

EAS: rs395157 IBD

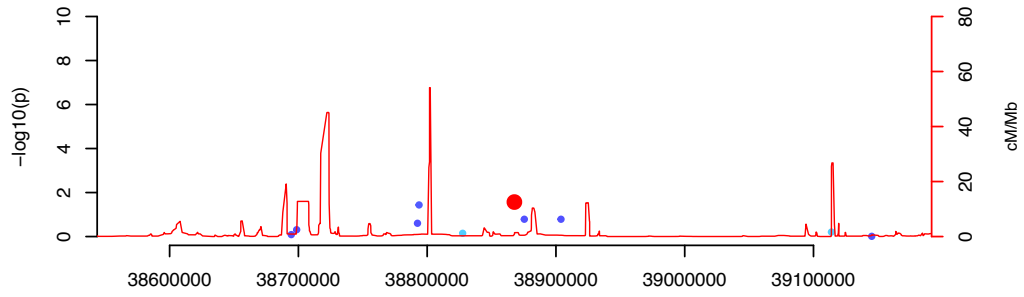

IND: rs395157 IBD

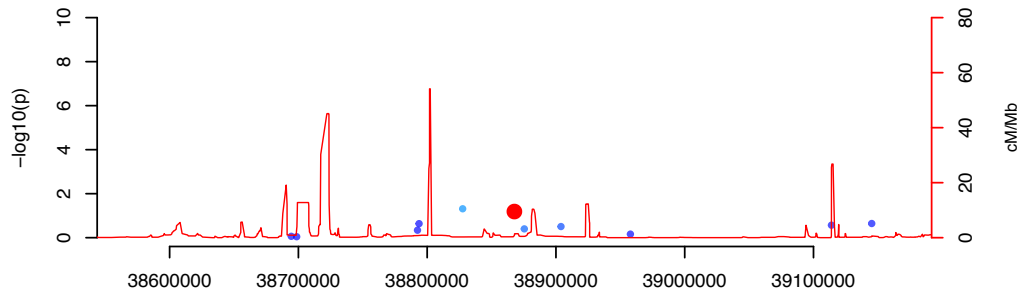

IRA: rs395157 IBD

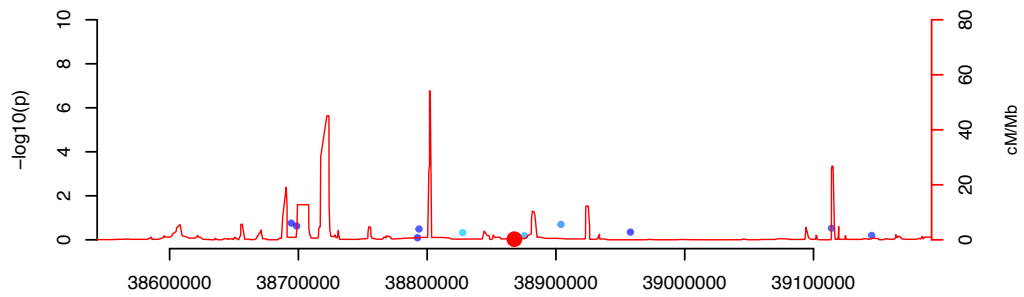

MANTRA meta-analysis: rs395157 IBD

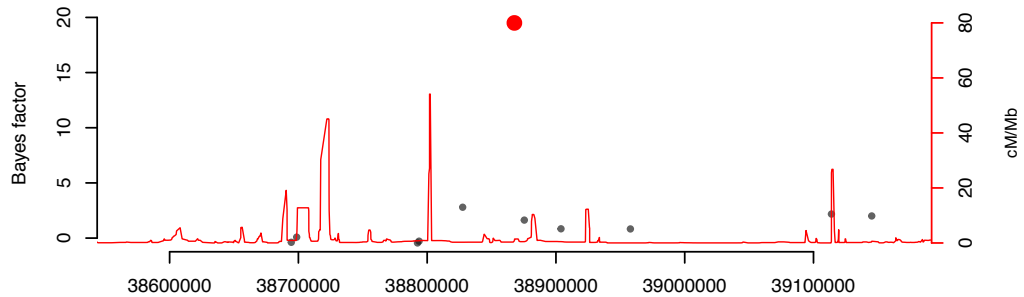

—| LIFR

—| OSMR  
—| RICTOR

—| AC008964.1  
—| FYB —|

EUR: rs4703855 IBD

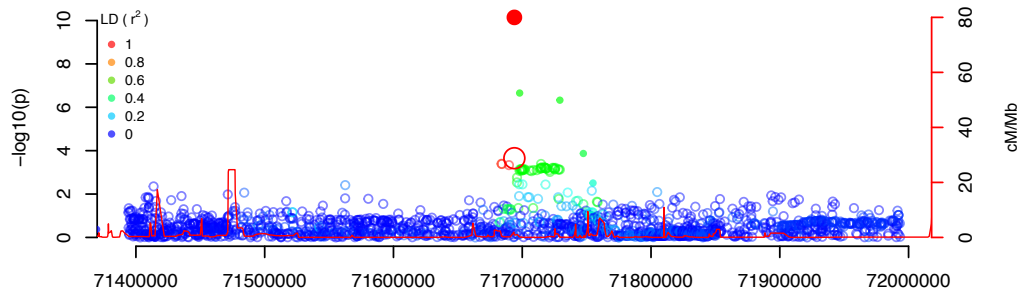

EAS: rs4703855 IBD

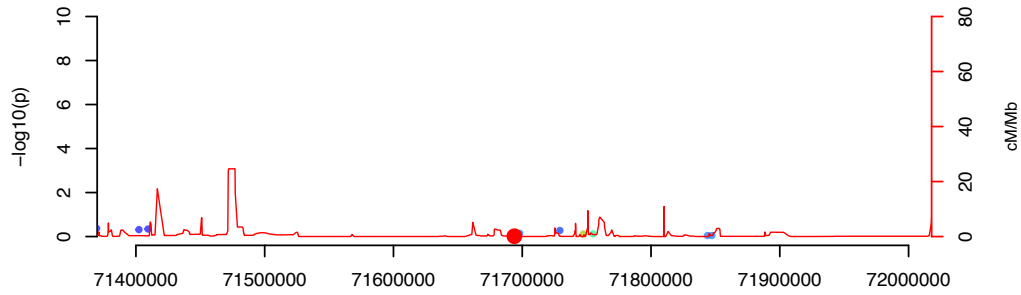

IND: rs4703855 IBD

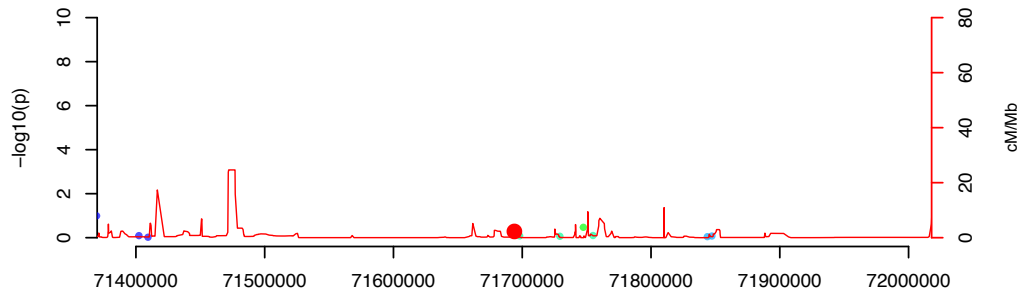

IRA: rs4703855 IBD

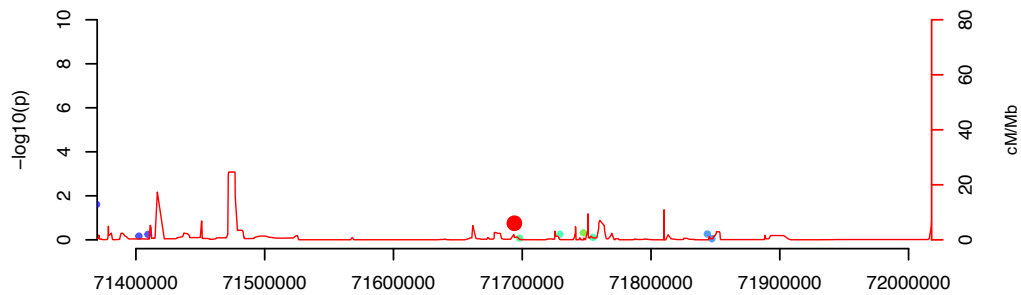

MANTRA meta-analysis: rs4703855 IBD

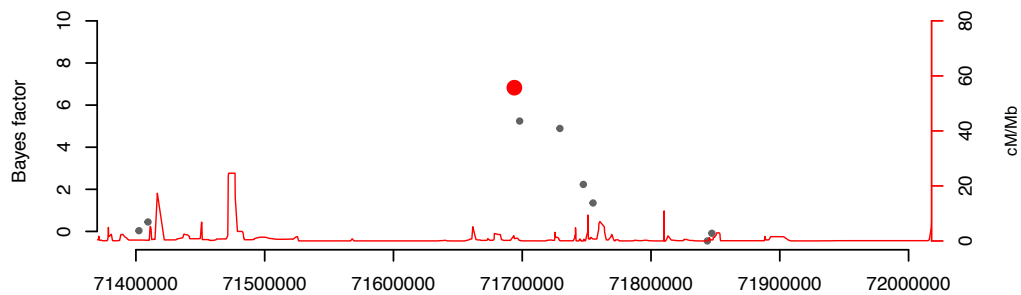

MAP1B

MRPS27  
PTCD2

ZNF366

EUR: rs564349 IBD

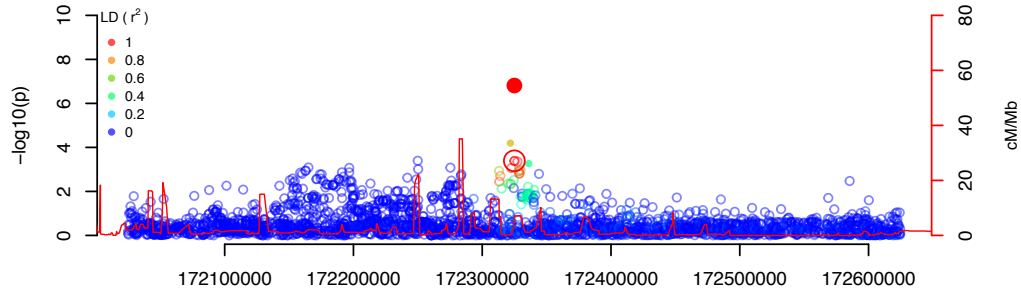

EAS: rs564349 IBD

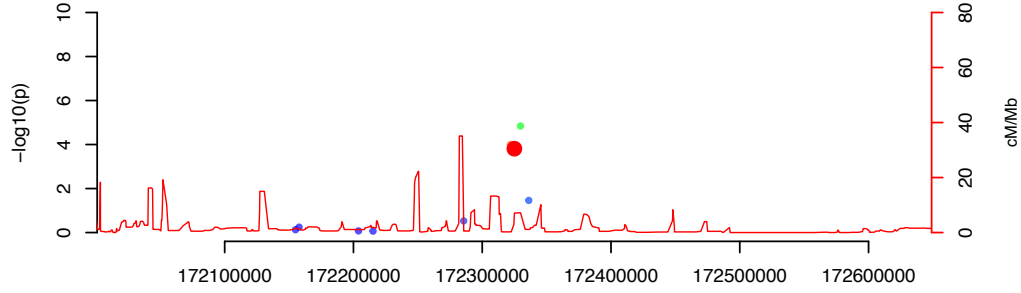

IND: rs564349 IBD

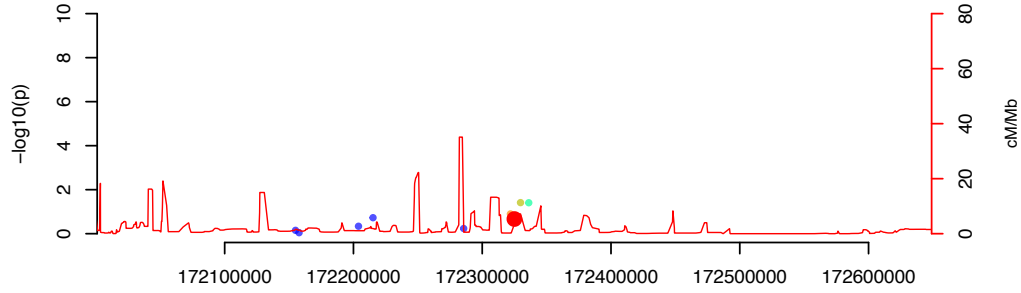

IRA: rs564349 IBD

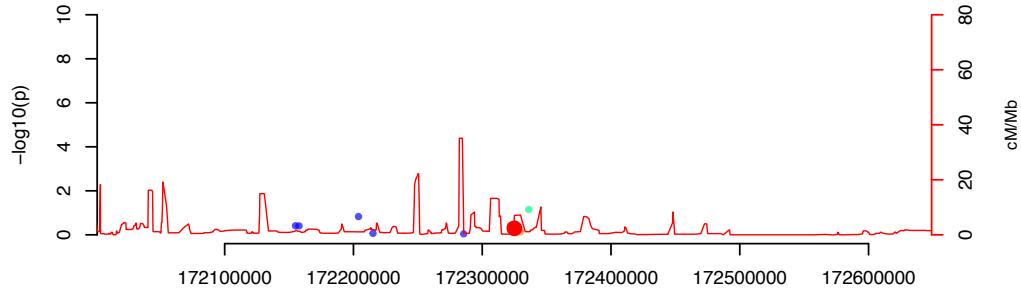

MANTRA meta-analysis: rs564349 IBD

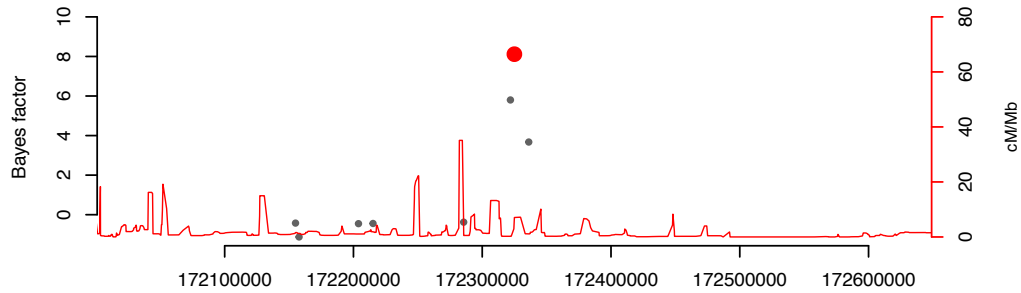

AC027309.1 | NEURL1B | DUSP1 | ERGIC1 | CREBRF | RPL26L1 | ATP6V0E1 | BNIP1

EUR: rs7773324 CD

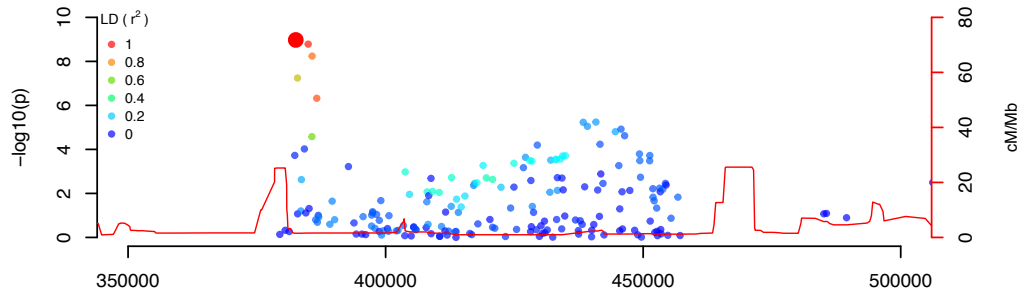

EAS: rs7773324 CD

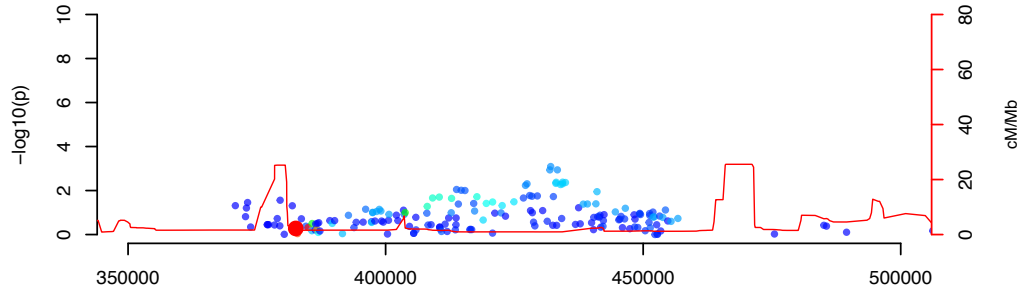

IND: rs7773324 CD

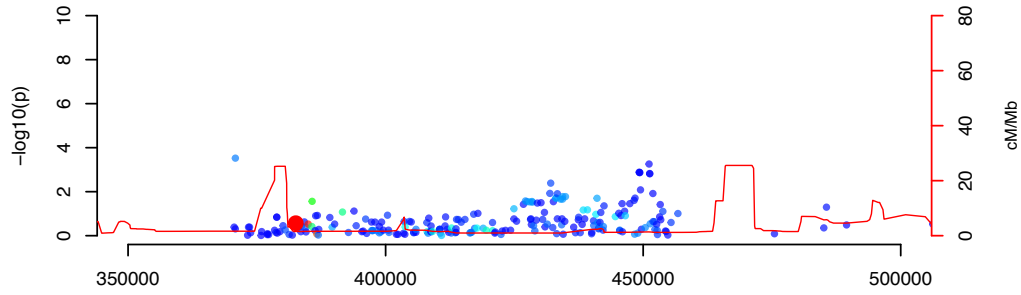

IRA: rs7773324 CD

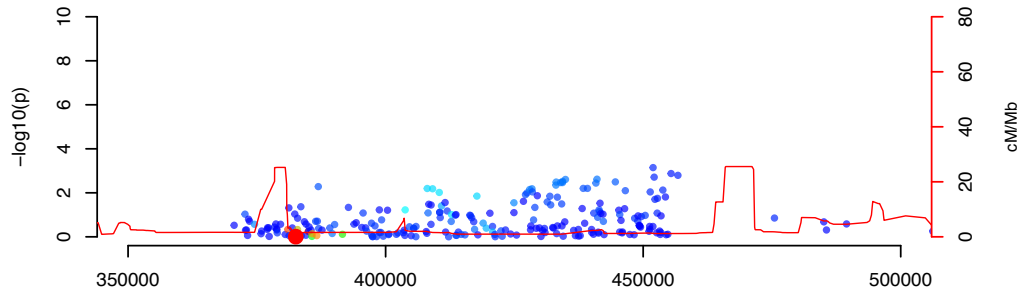

MANTRA meta-analysis: rs7773324 CD

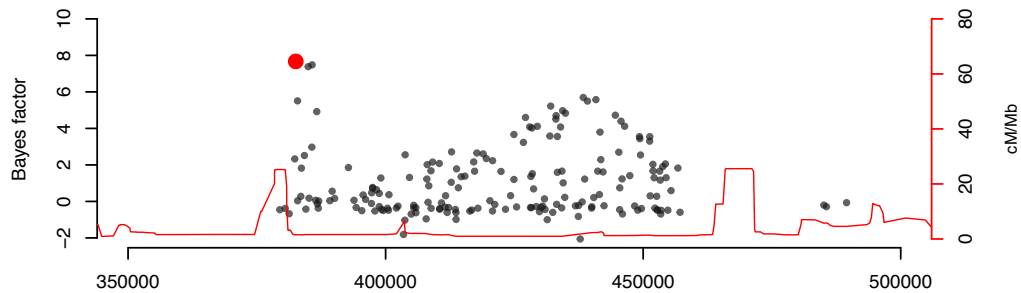

DUSP22

IRF4

EXOC2

EUR: rs13204048 CD

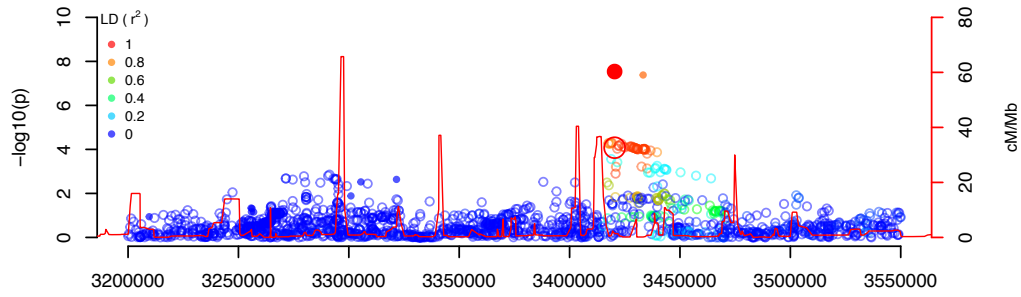

EAS: rs13204048 CD

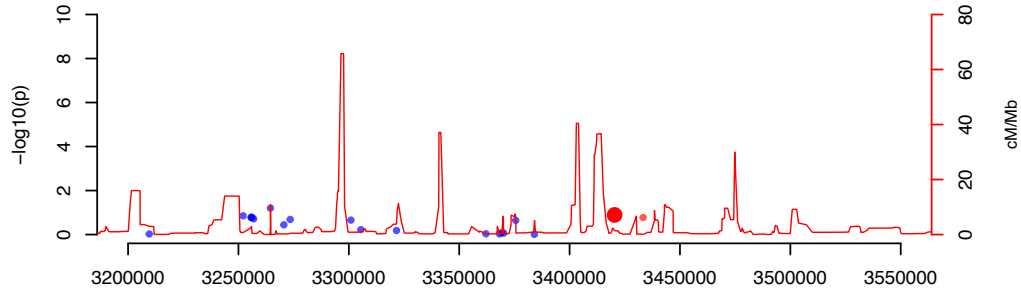

IND: rs13204048 CD

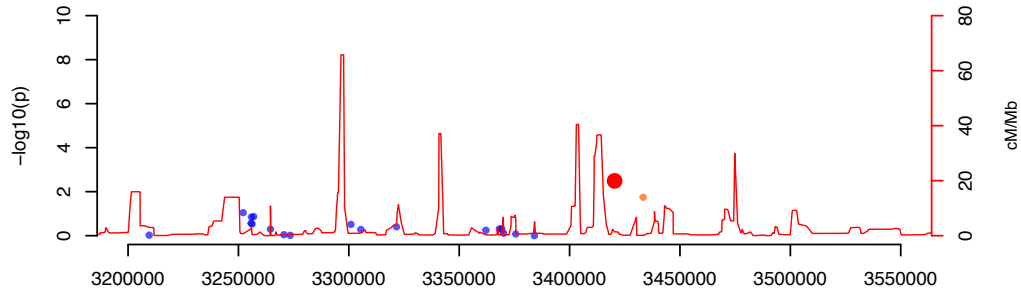

IRA: rs13204048 CD

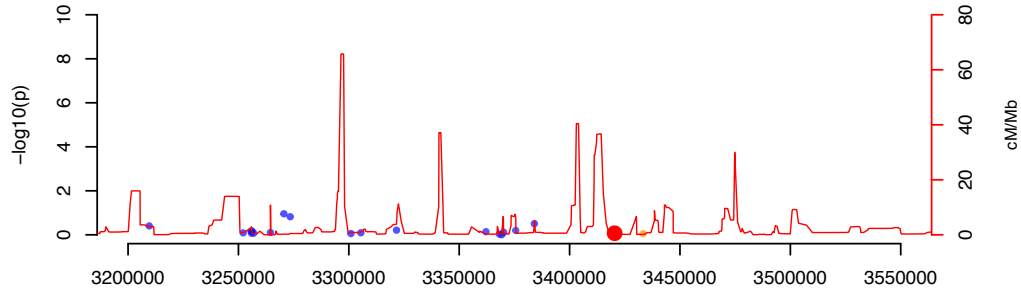

MANTRA meta-analysis: rs13204048 CD

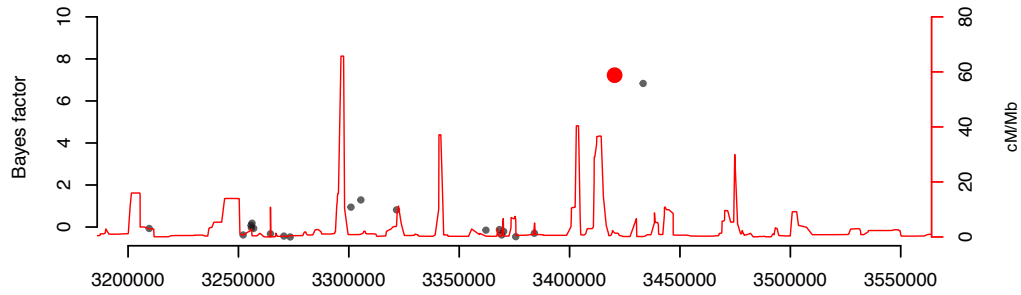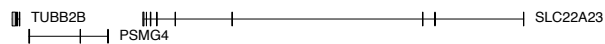



EUR: rs7758080 CD

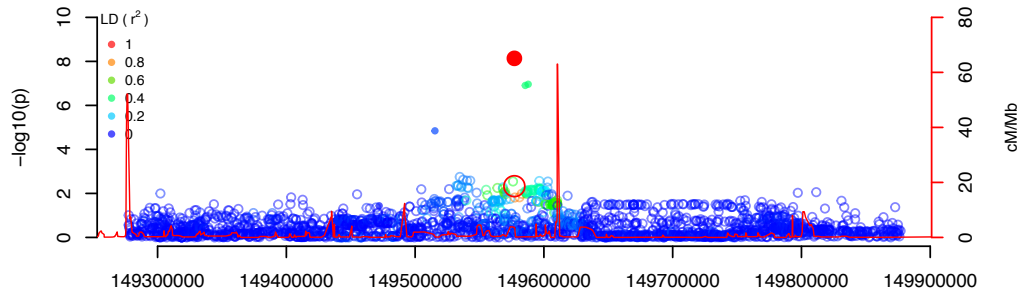

EAS: rs7758080 CD

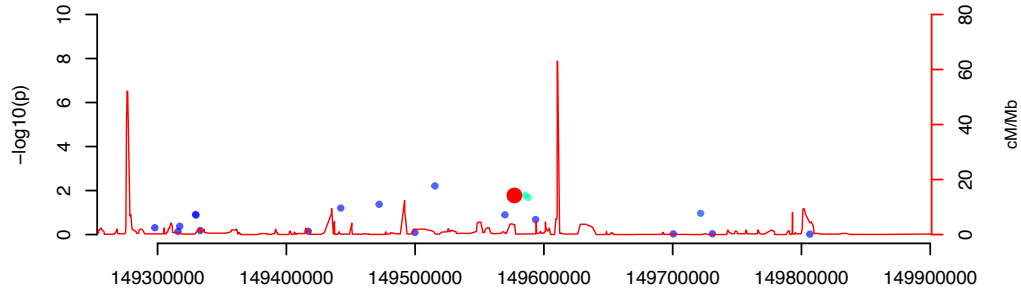

IND: rs7758080 CD

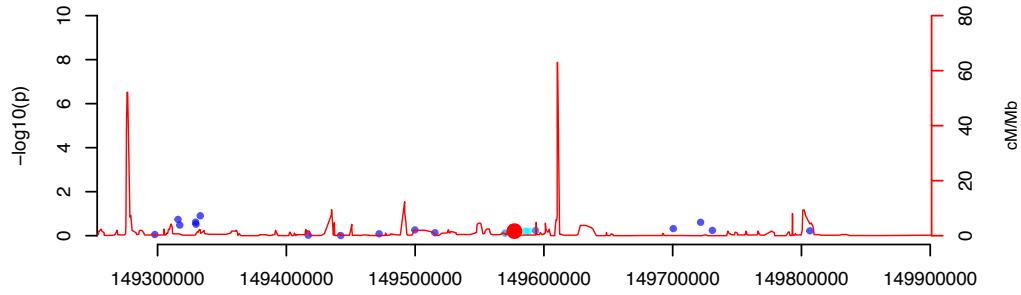

IRA: rs7758080 CD

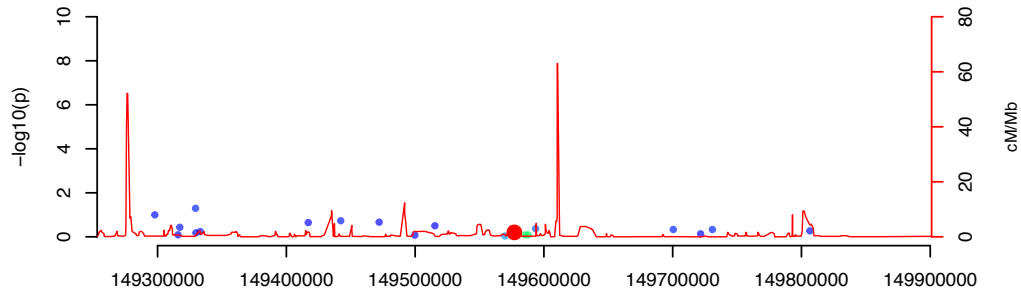

MANTRA meta-analysis: rs7758080 CD

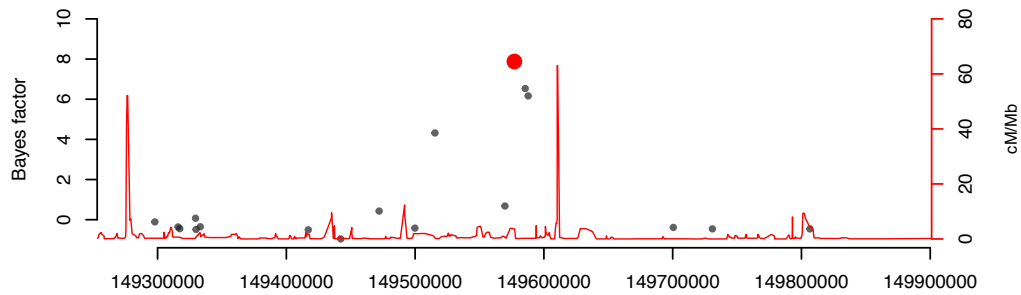

U ST

TAB2

SUMO4

ZC3H12D

PPIL

EUR: rs1077773 UC

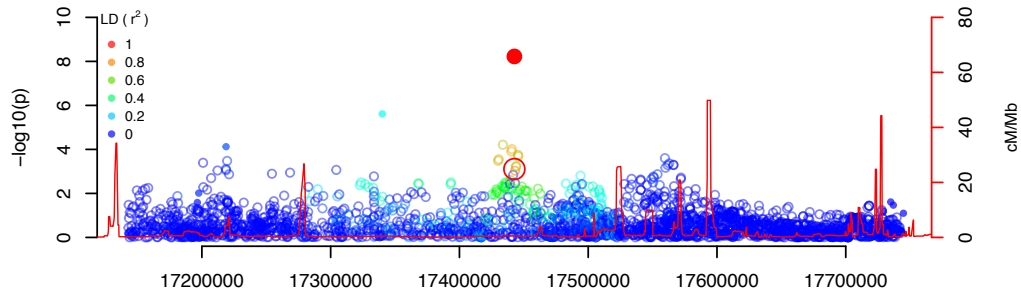

EAS: rs1077773 UC

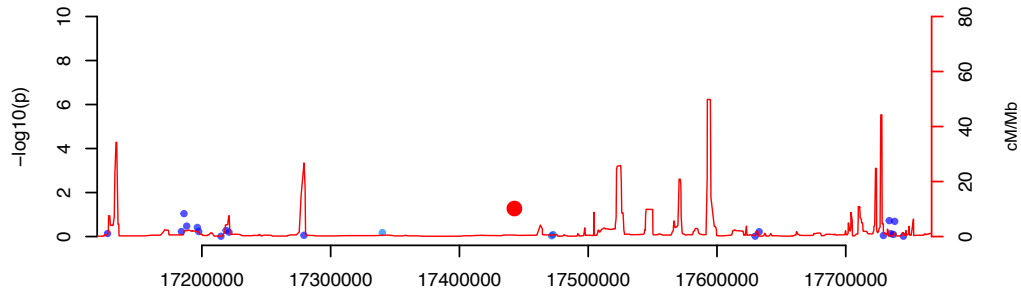

IND: rs1077773 UC

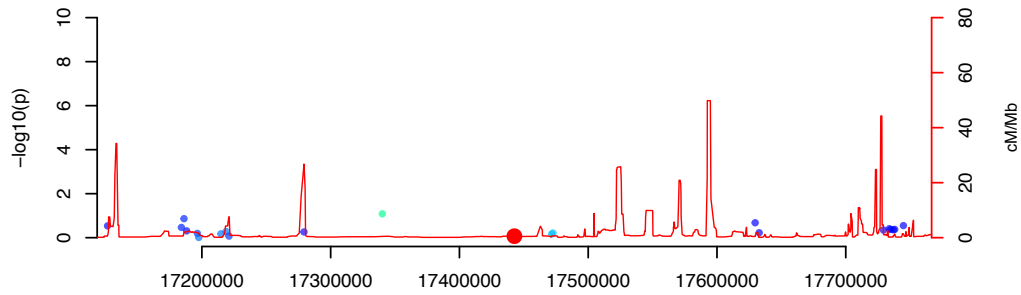

IRA: rs1077773 UC

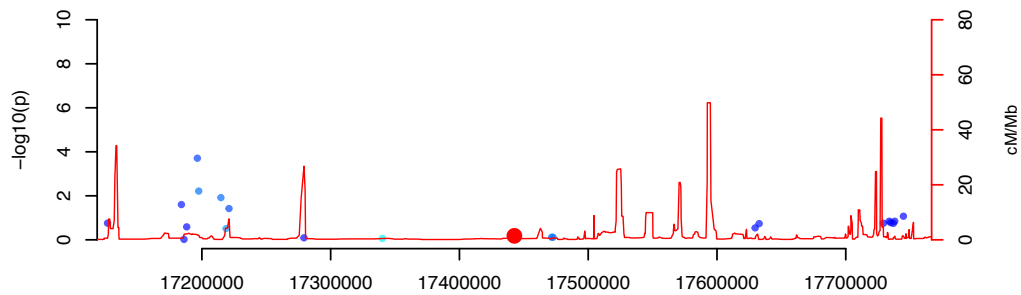

MANTRA meta-analysis: rs1077773 UC

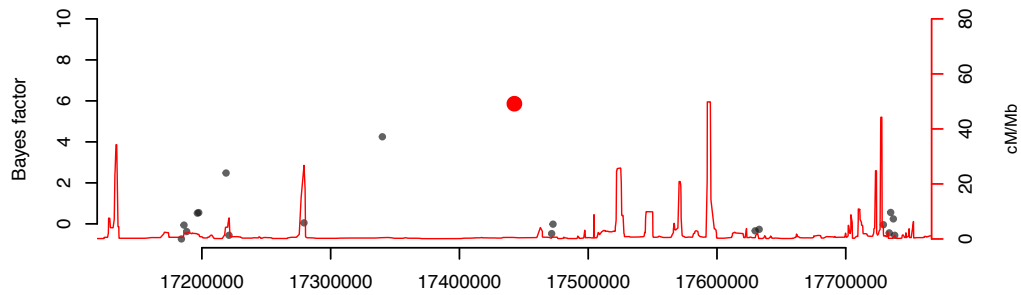

EUR: rs2538470 IBD

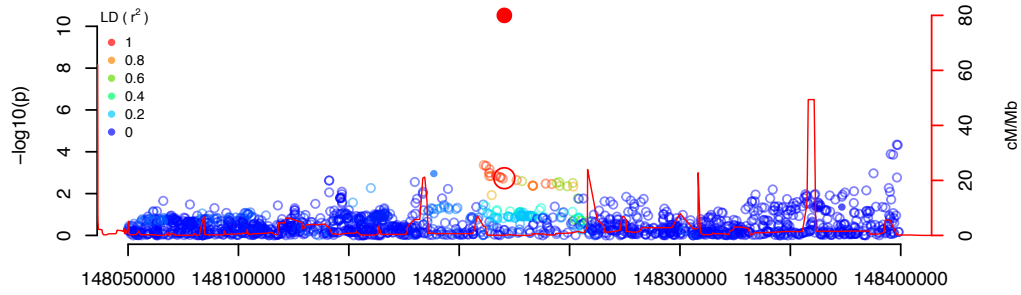

EAS: rs2538470 IBD

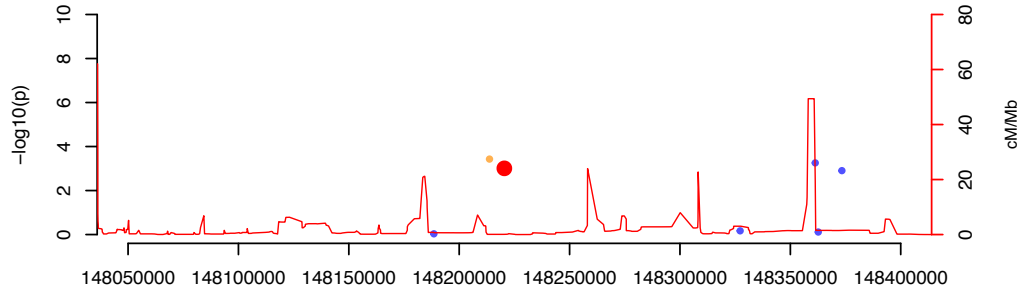

IND: rs2538470 IBD

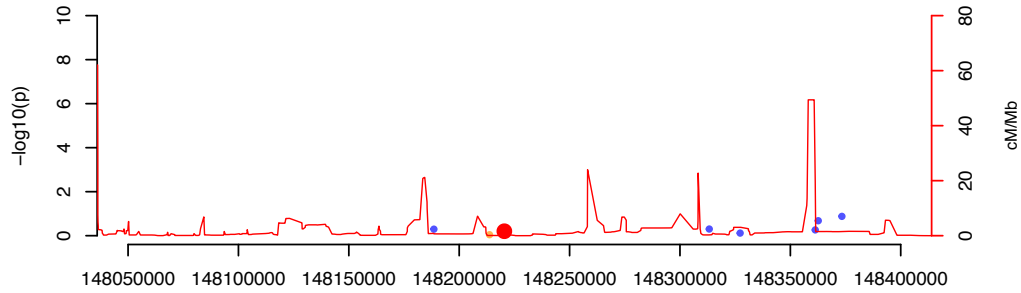

IRA: rs2538470 IBD

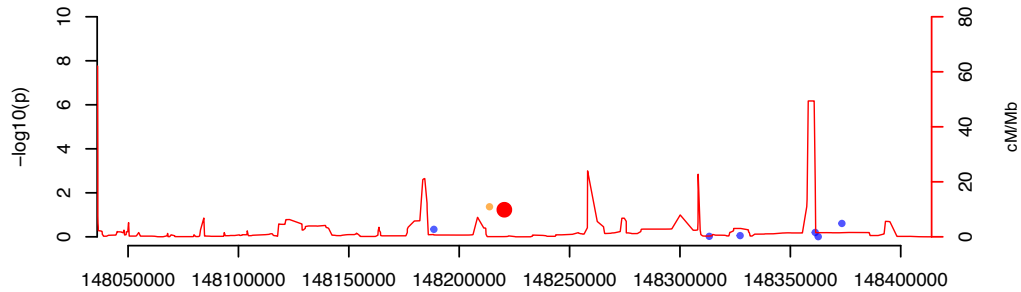

MANTRA meta-analysis: rs2538470 IBD

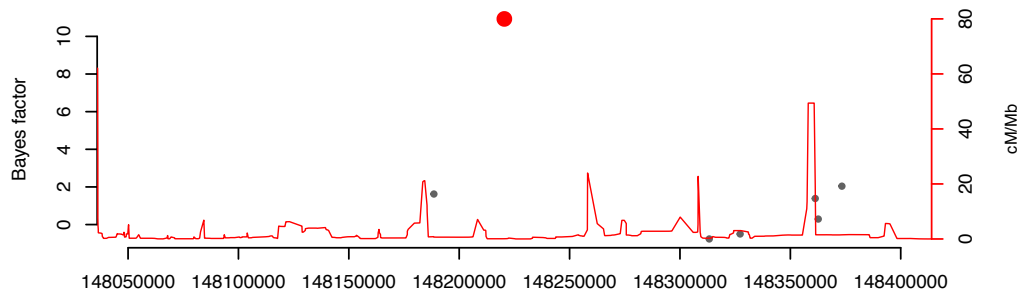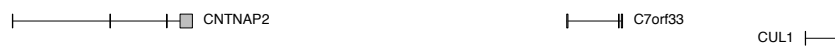

EUR: rs17057051 IBD

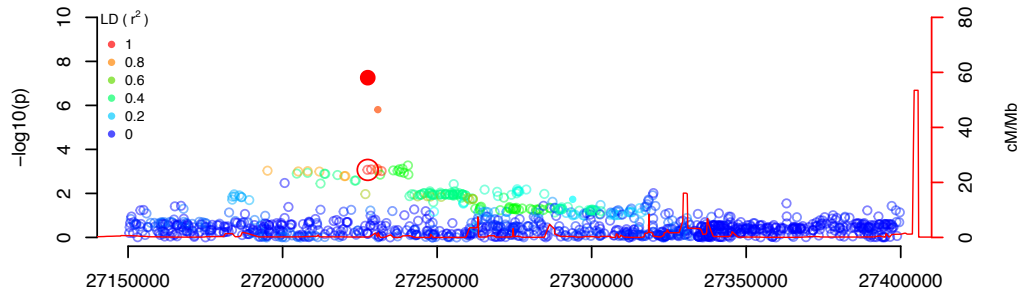

EAS: rs17057051 IBD

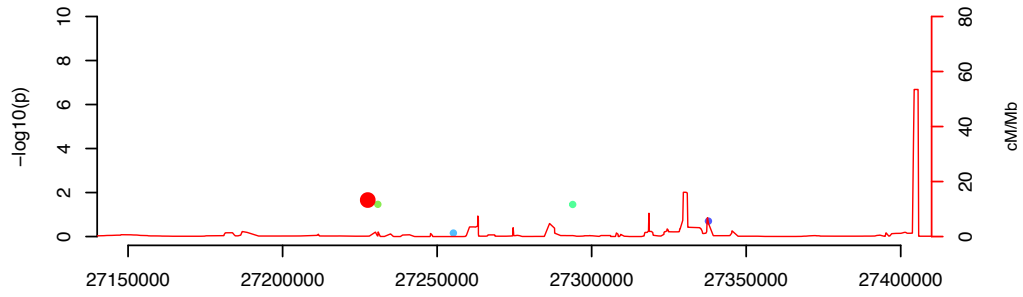

IND: rs17057051 IBD

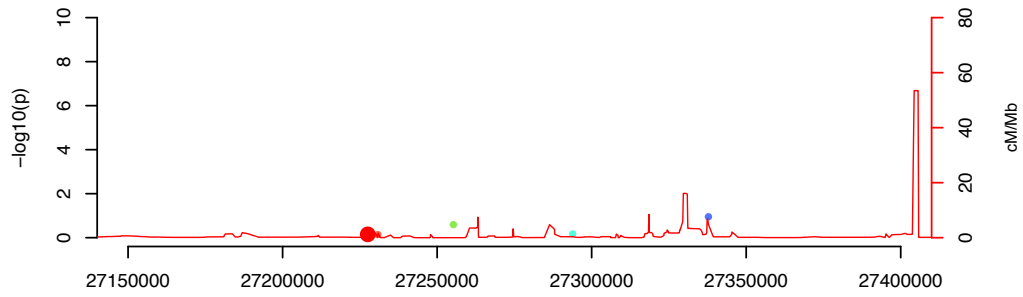

IRA: rs17057051 IBD

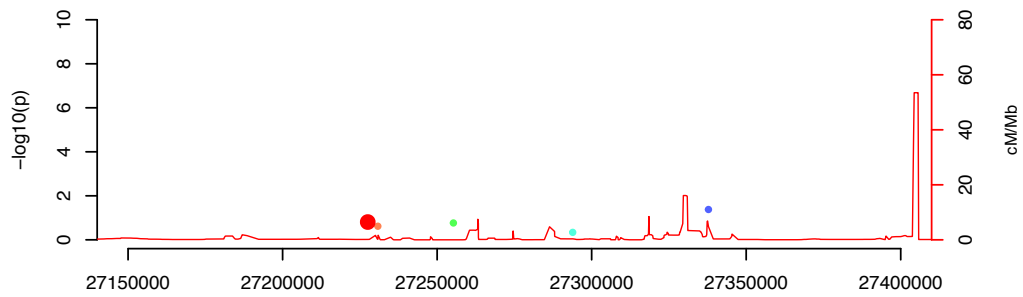

MANTRA meta-analysis: rs17057051 IBD

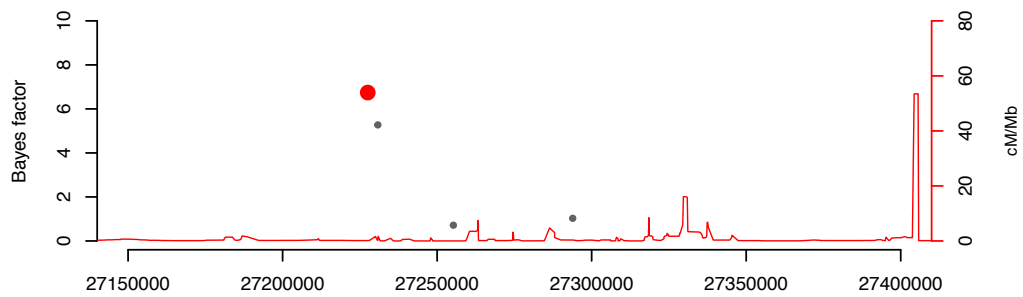

TRIM35

PTK2B

CHRNA2

EPH

EUR: rs7011507 UC

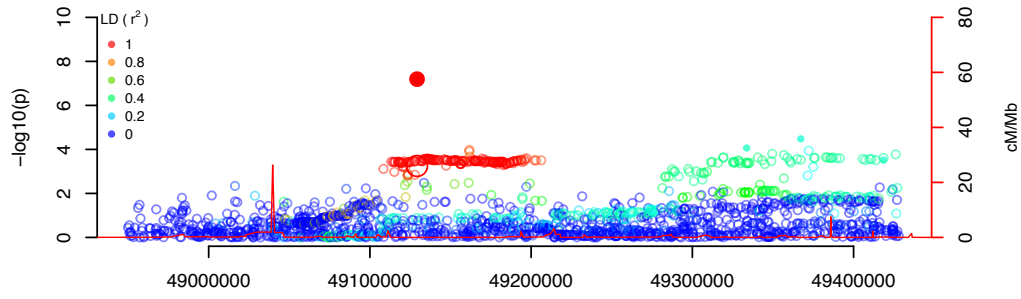

EAS: rs7011507 UC

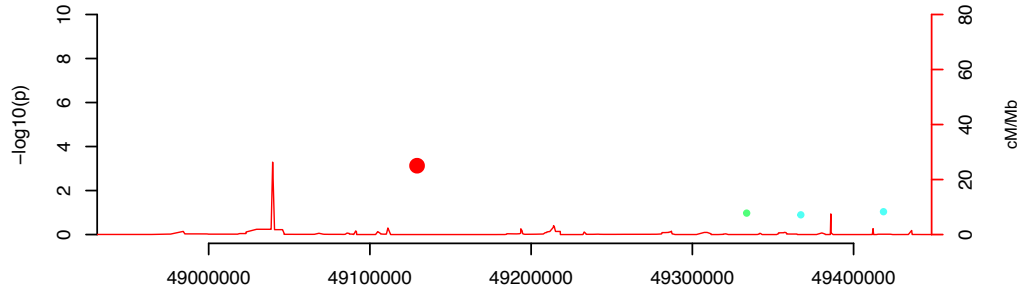

IND: rs7011507 UC

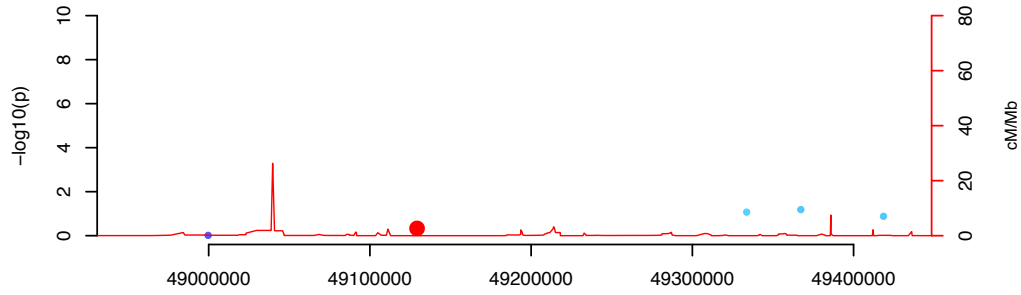

IRA: rs7011507 UC

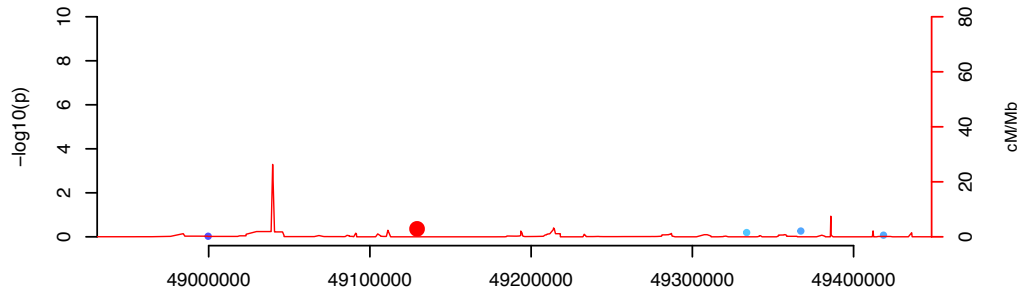

MANTRA meta-analysis: rs7011507 UC

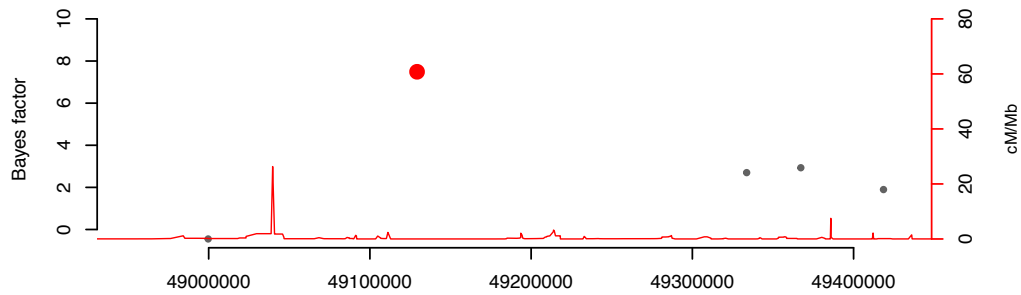

—|—|—| UBE2V2

EUR: rs3740415 IBD

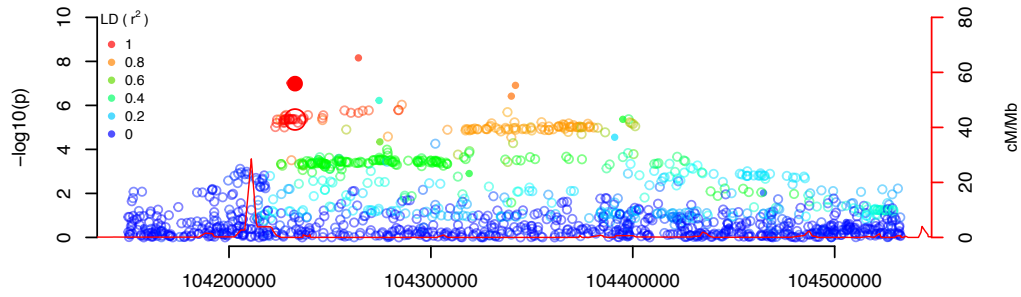

EAS: rs3740415 IBD

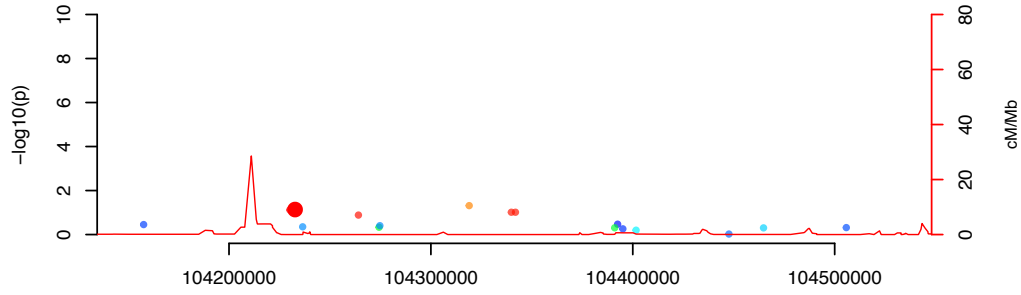

IND: rs3740415 IBD

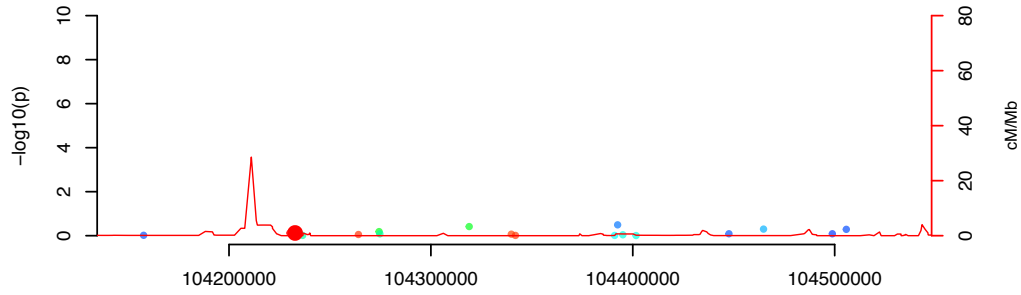

IRA: rs3740415 IBD

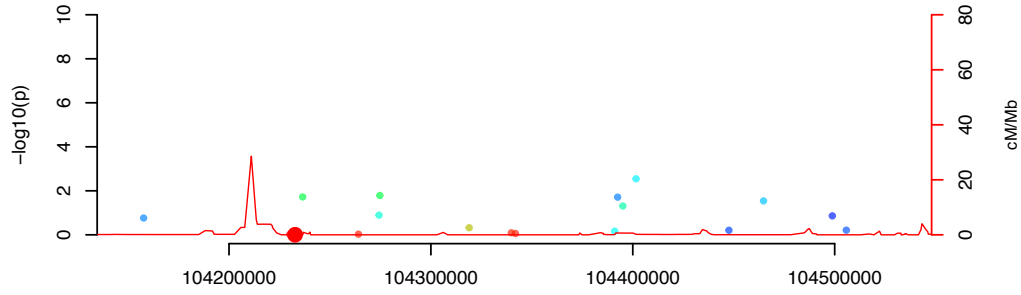

MANTRA meta-analysis: rs3740415 IBD

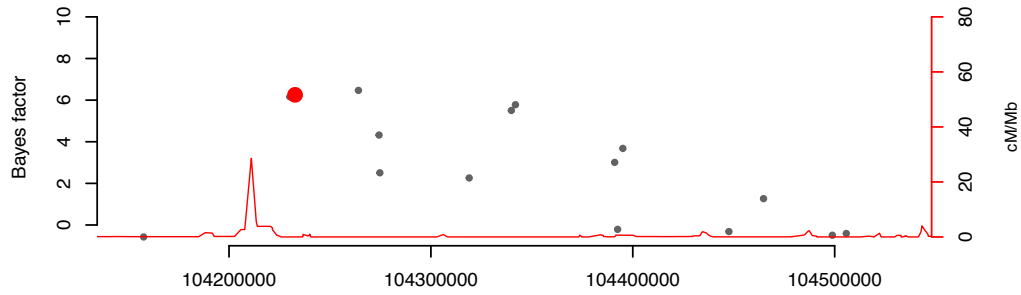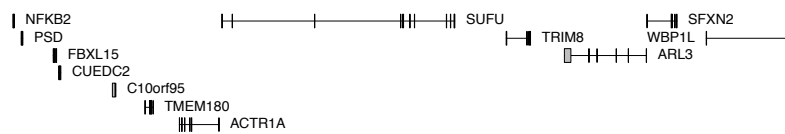

EUR: rs7954567 CD

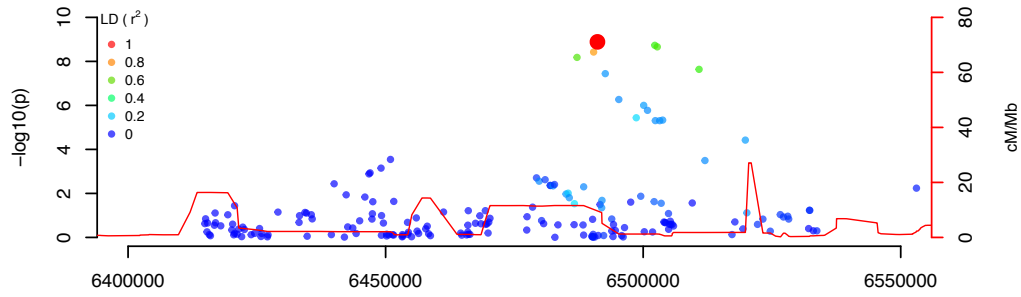

EAS: rs7954567 CD

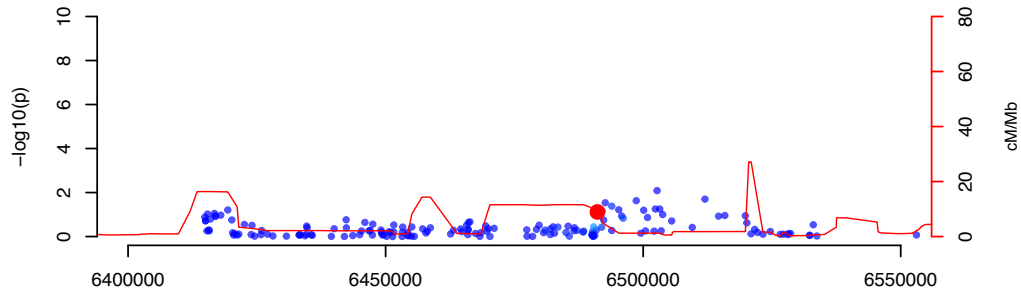

IND: rs7954567 CD

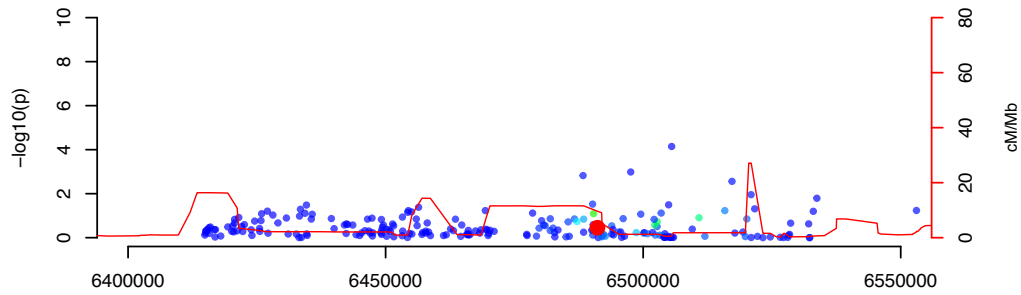

IRA: rs7954567 CD

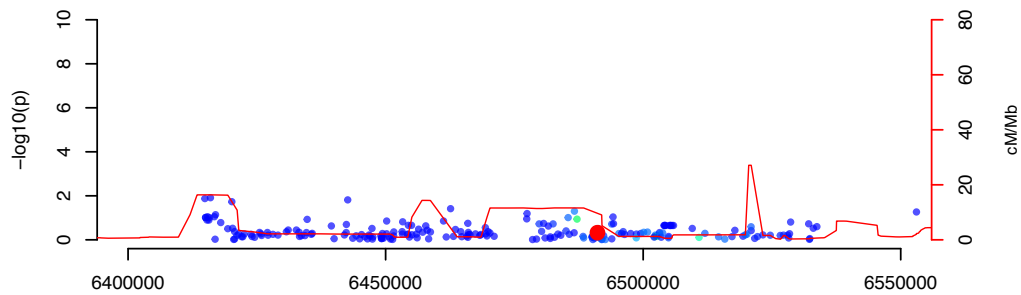

MANTRA meta-analysis: rs7954567 CD

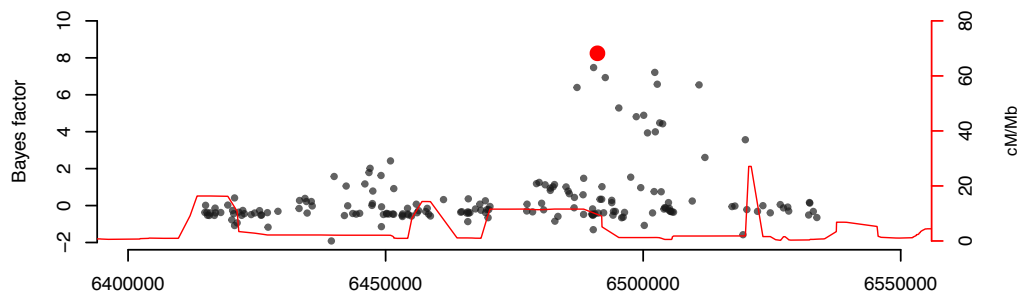

||||| PLEKHG6      ||| SCNN1A  
||| TNFRSF1A      ||| LTBR

EUR: rs653178 IBD

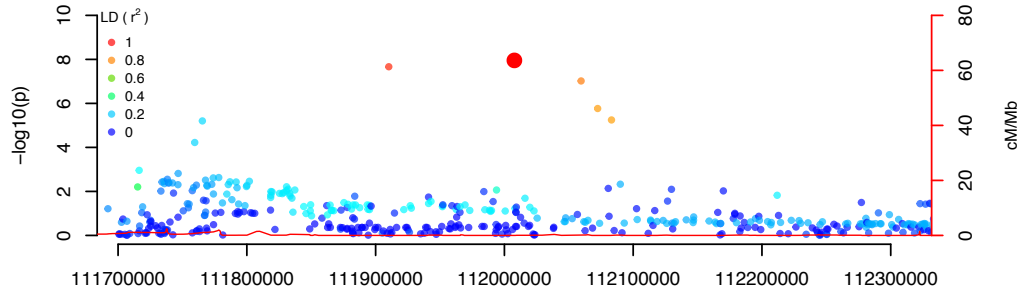

EAS: rs653178 IBD

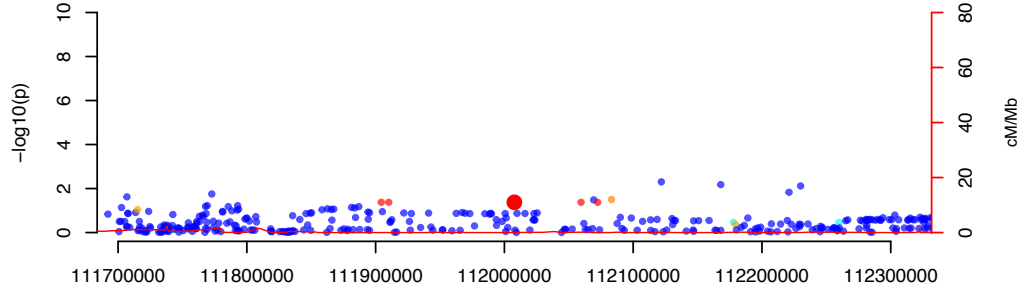

IND: rs653178 IBD

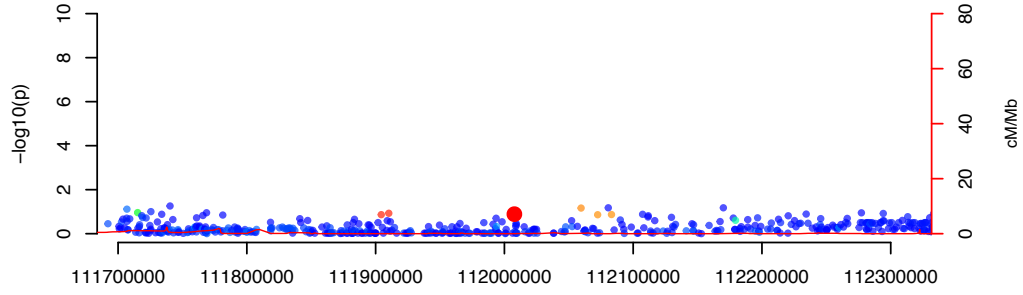

IRA: rs653178 IBD

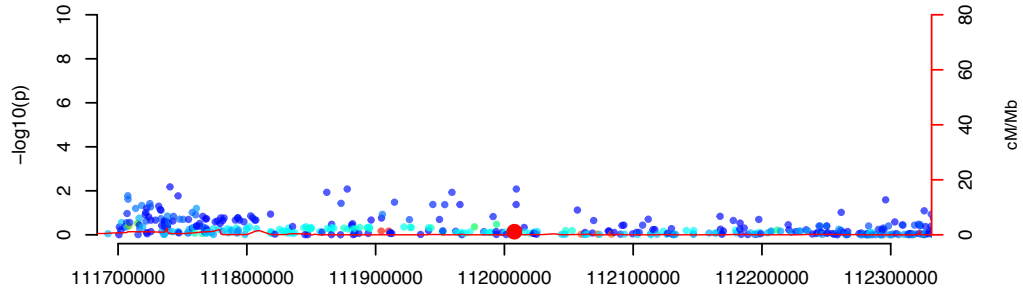

MANTRA meta-analysis: rs653178 IBD

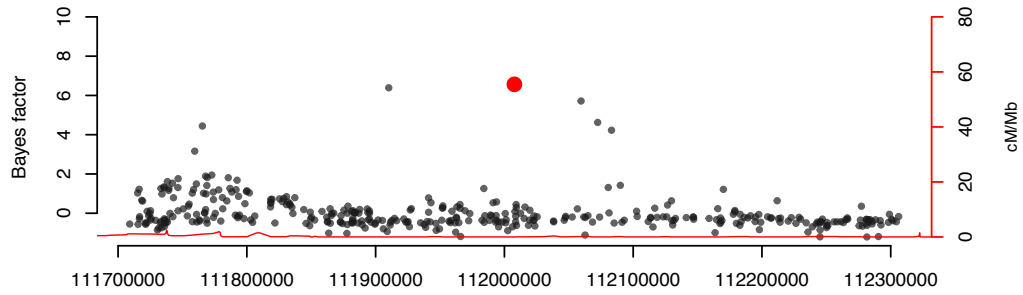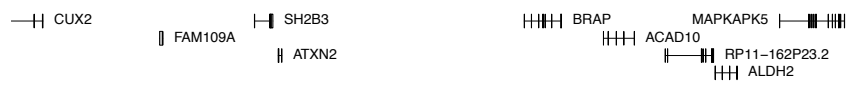



EUR: rs11064881 IBD

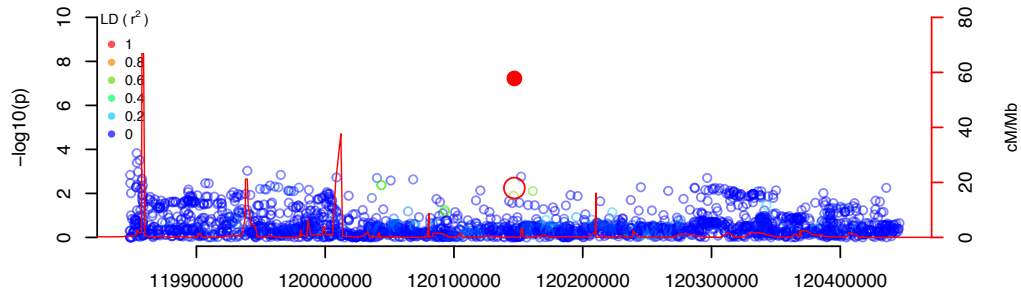

EAS: rs11064881 IBD

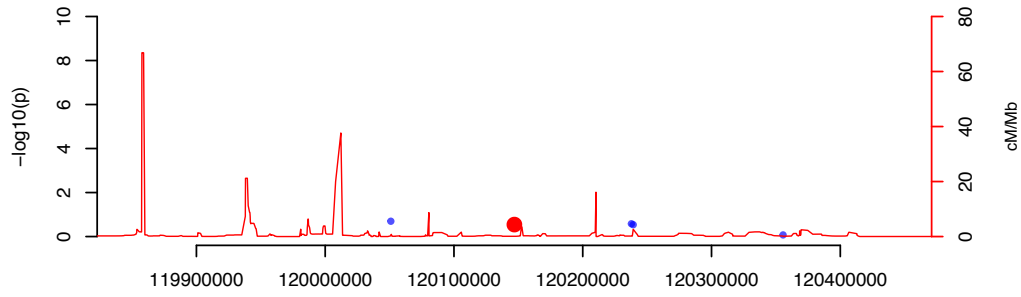

IND: rs11064881 IBD

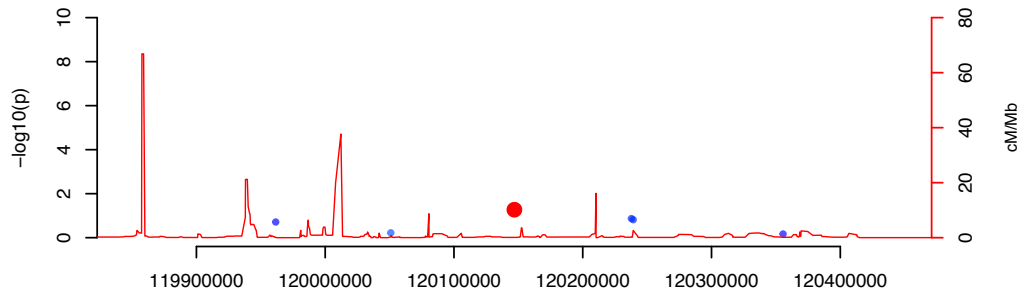

IRA: rs11064881 IBD

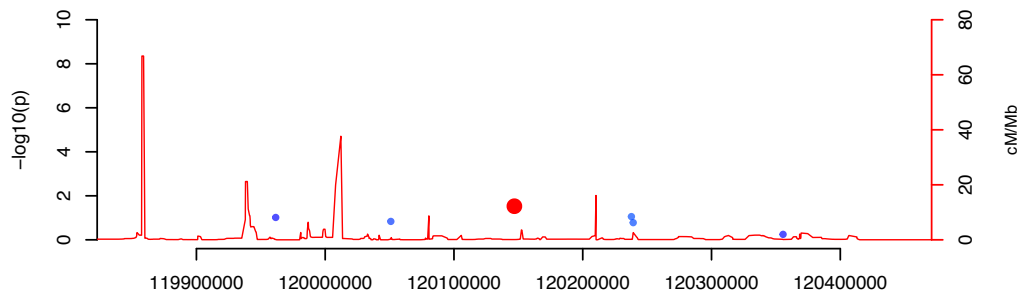

MANTRA meta-analysis: rs11064881 IBD

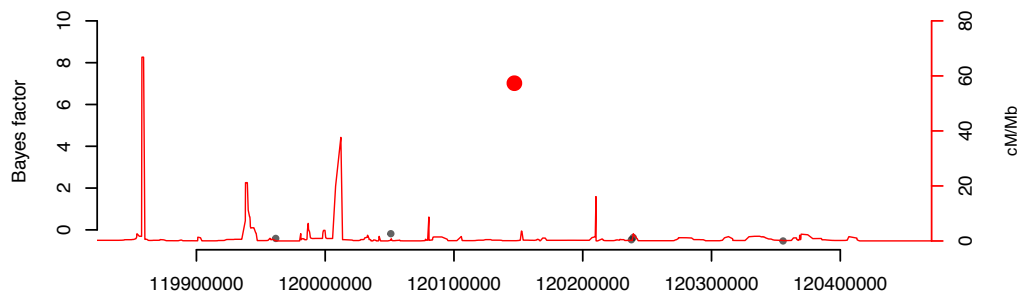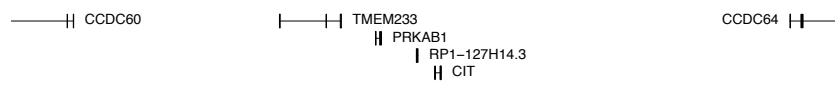

EUR: rs9525625 CD

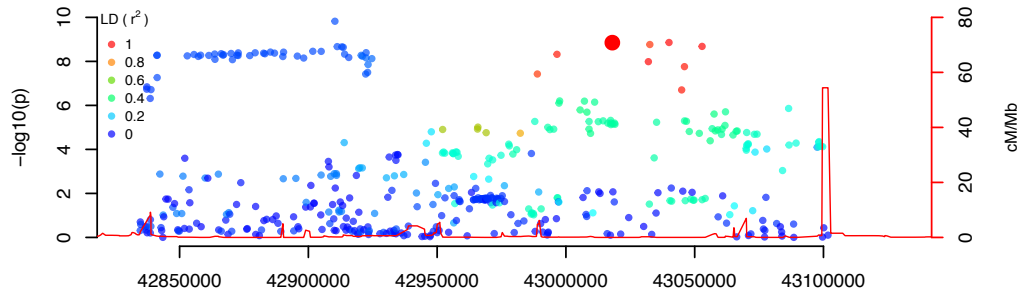

EAS: rs9525625 CD

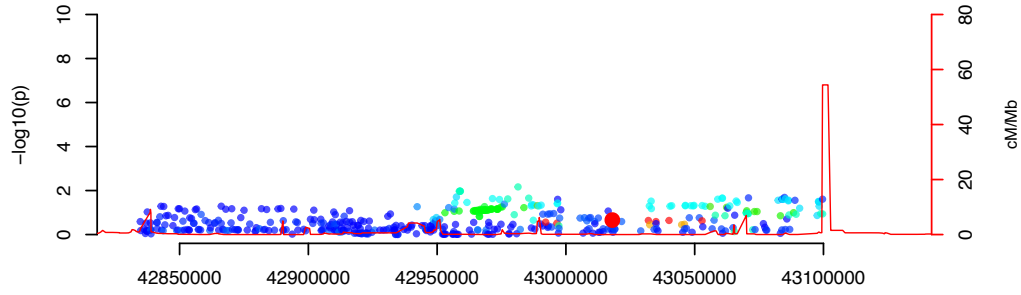

IND: rs9525625 CD

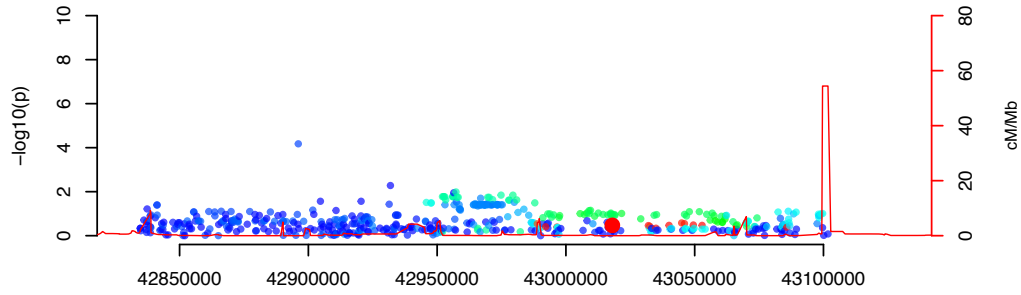

IRA: rs9525625 CD

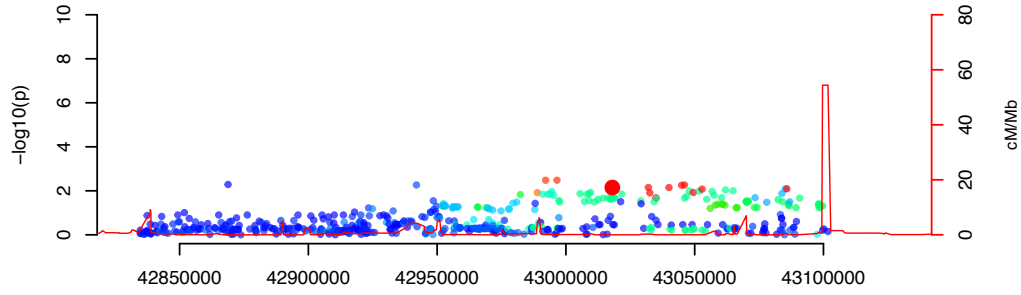

MANTRA meta-analysis: rs9525625 CD

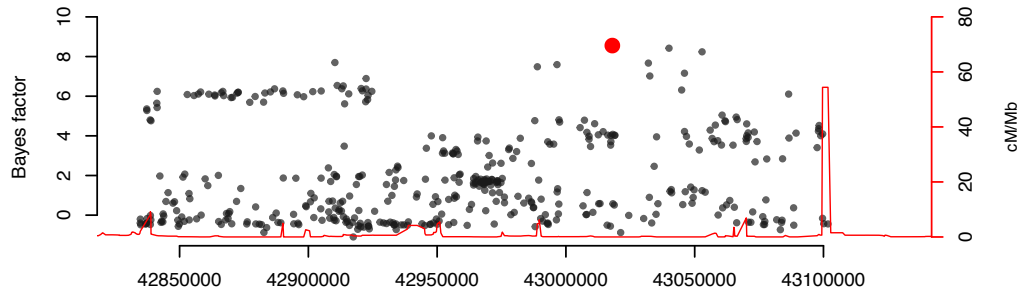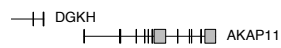

EUR: rs3853824 CD

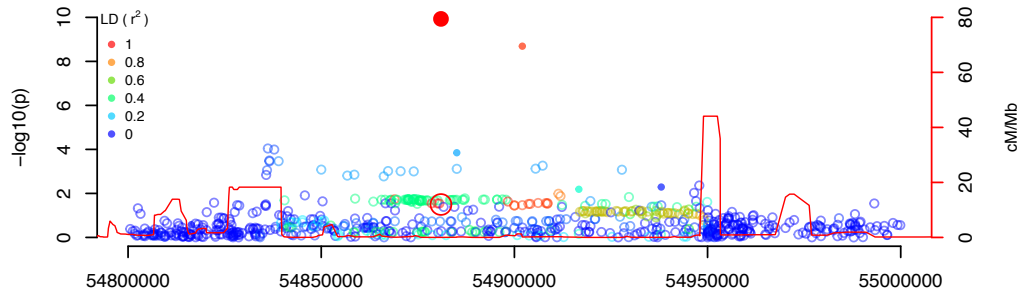

EAS: rs3853824 CD

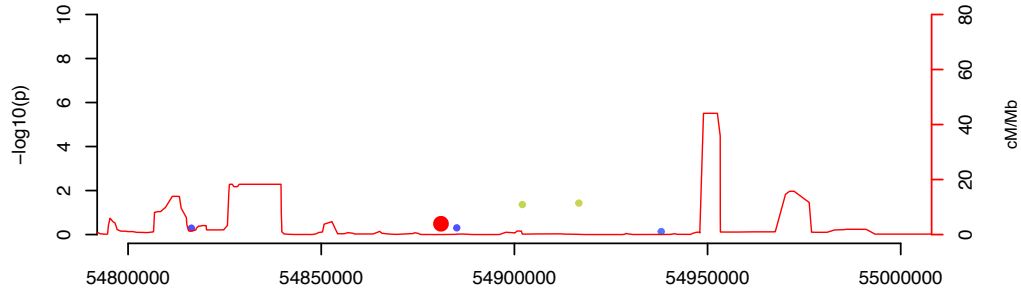

IND: rs3853824 CD

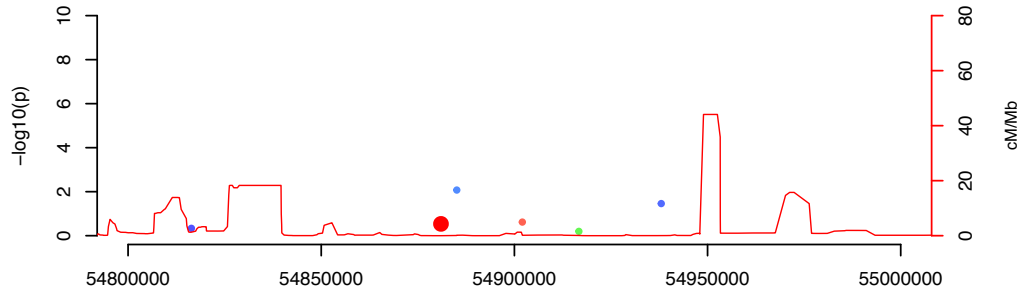

IRA: rs3853824 CD

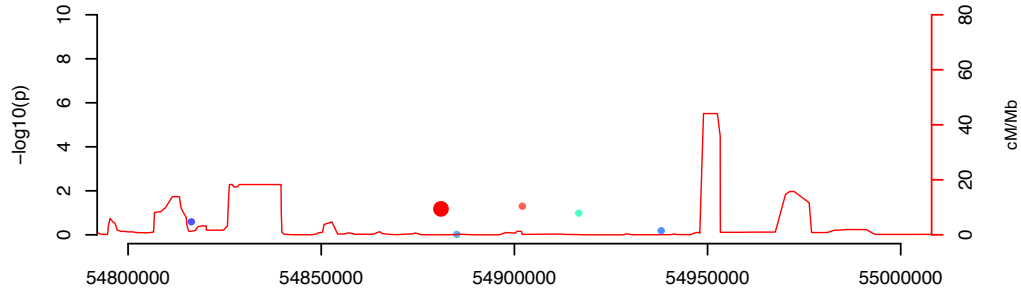

MANTRA meta-analysis: rs3853824 CD

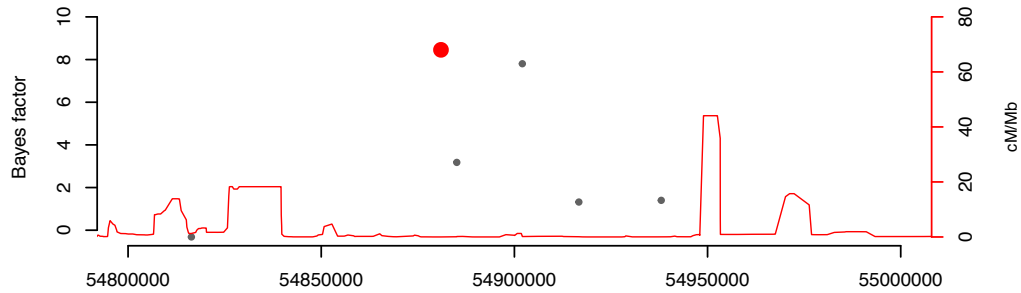

H C17orf67

H DGKE

H TRIM25

EUR: rs17736589 UC

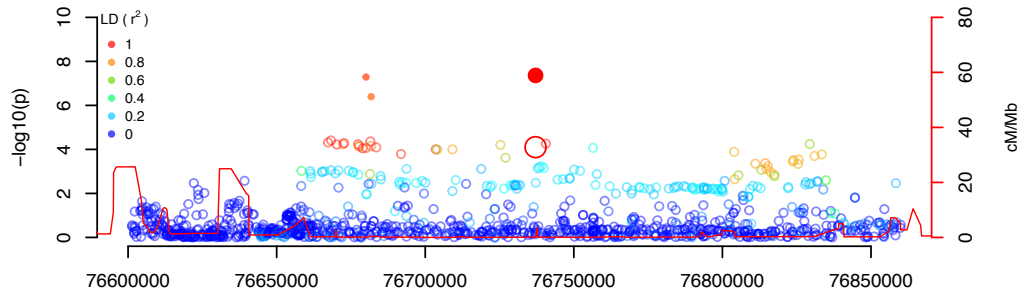

EAS: rs17736589 UC

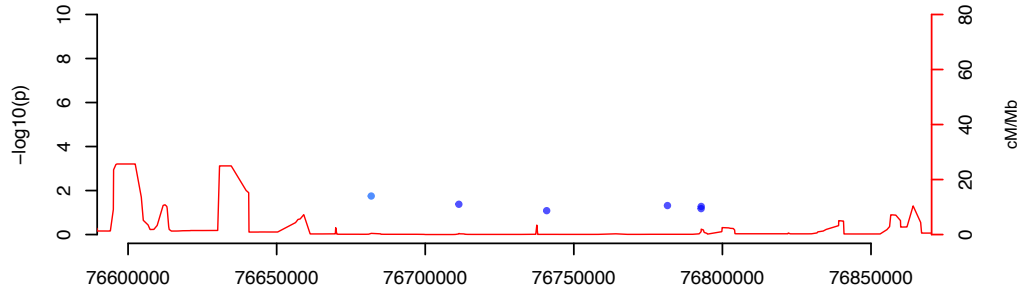

IND: rs17736589 UC

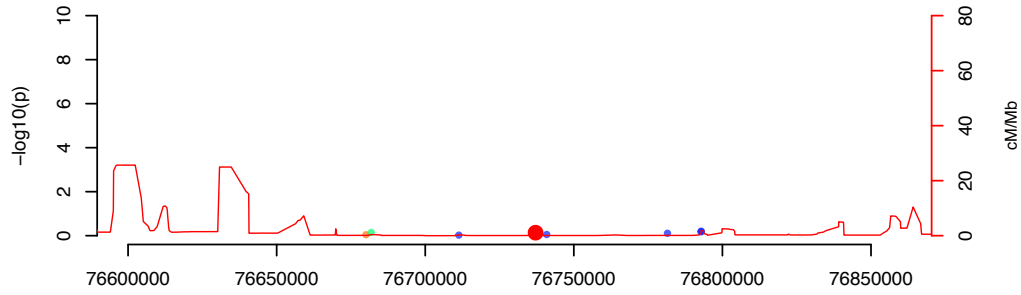

IRA: rs17736589 UC

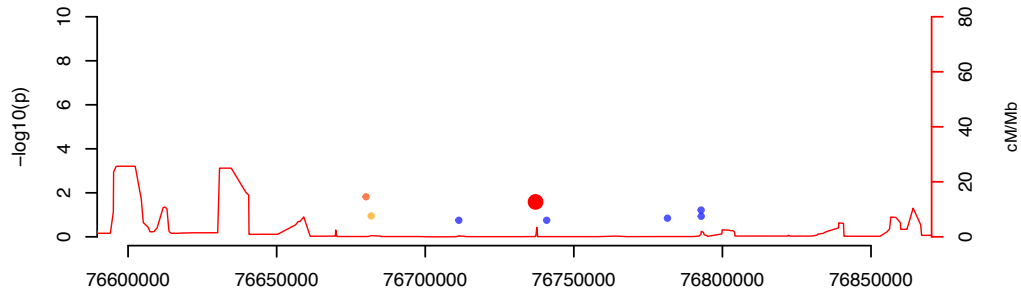

MANTRA meta-analysis: rs17736589 UC

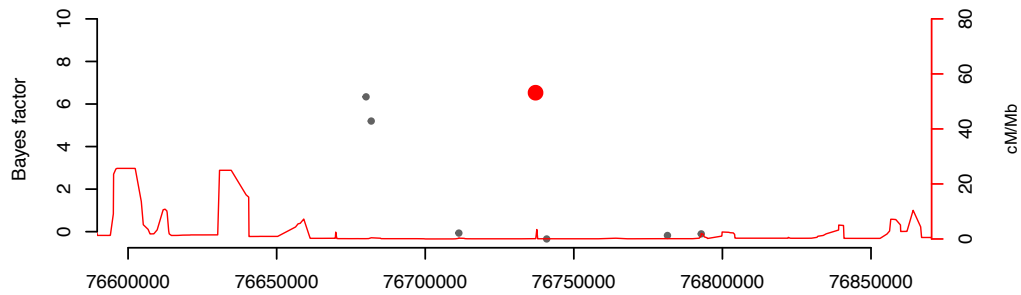

■|■|■|■|■| CYTH1

■|■|■|■| USP36  
■|■|■| TIMP2

EUR: rs9319943 CD

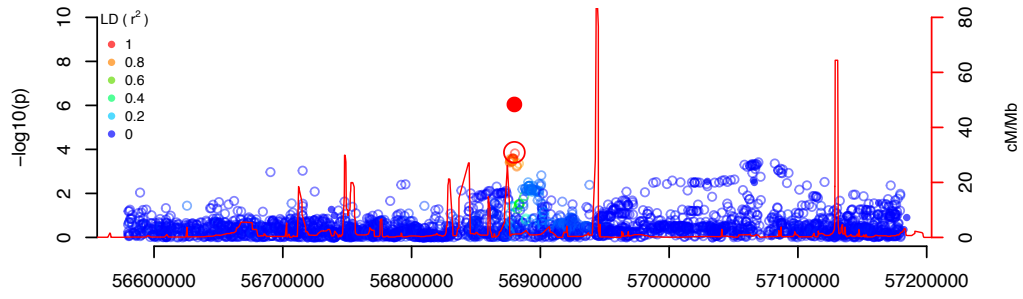

EAS: rs9319943 CD

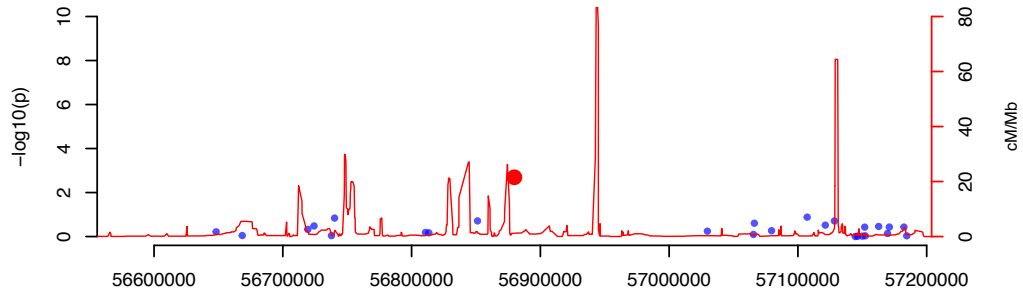

IND: rs9319943 CD

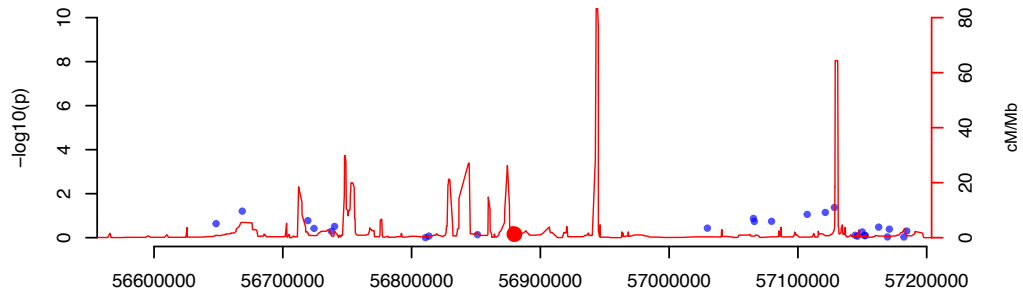

IRA: rs9319943 CD

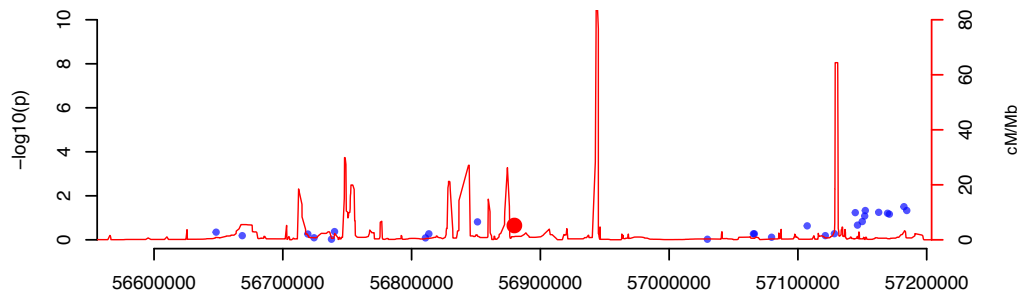

MANTRA meta-analysis: rs9319943 CD

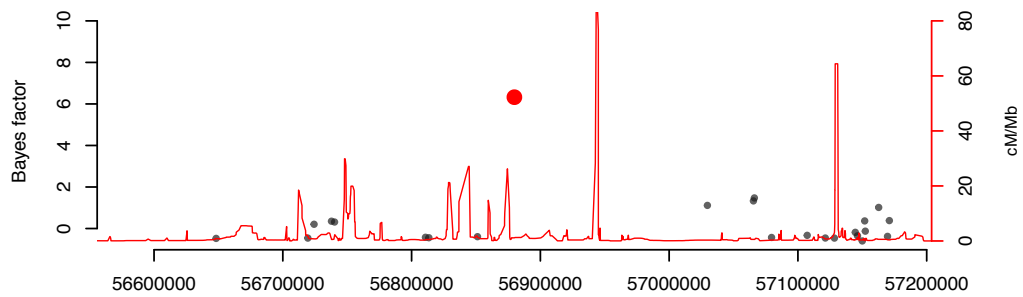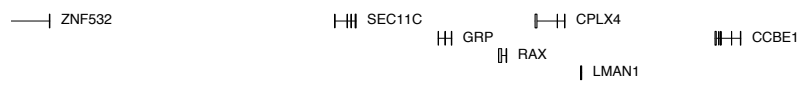

EUR: rs7236492 CD

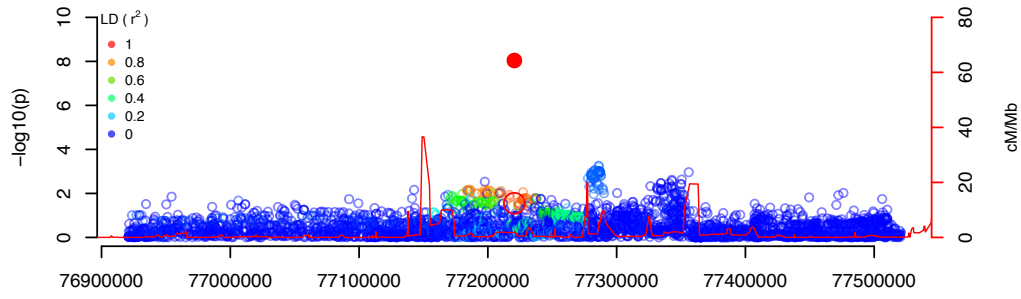

EAS: rs7236492 CD

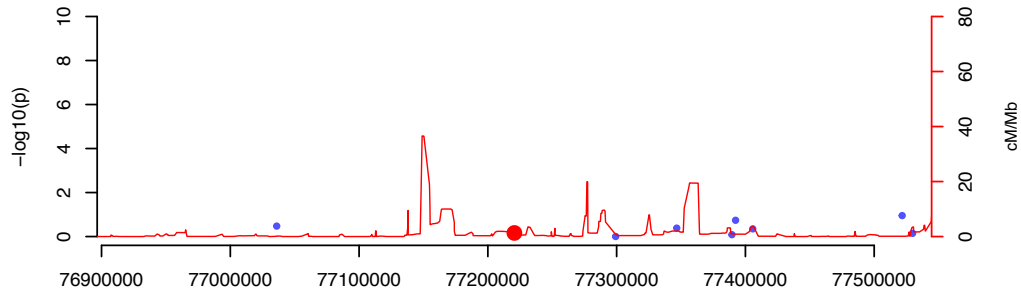

IND: rs7236492 CD

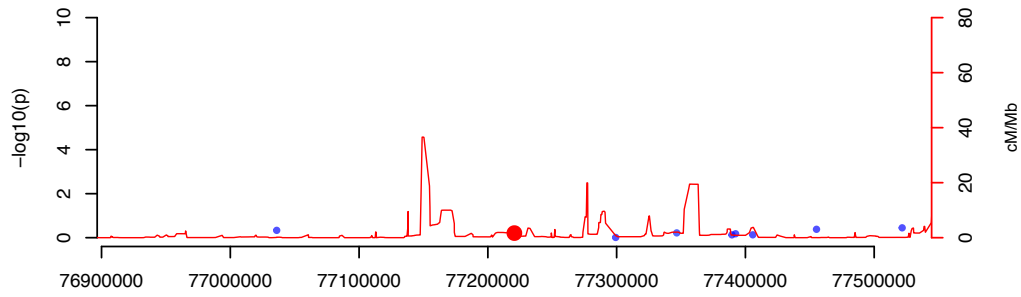

IRA: rs7236492 CD

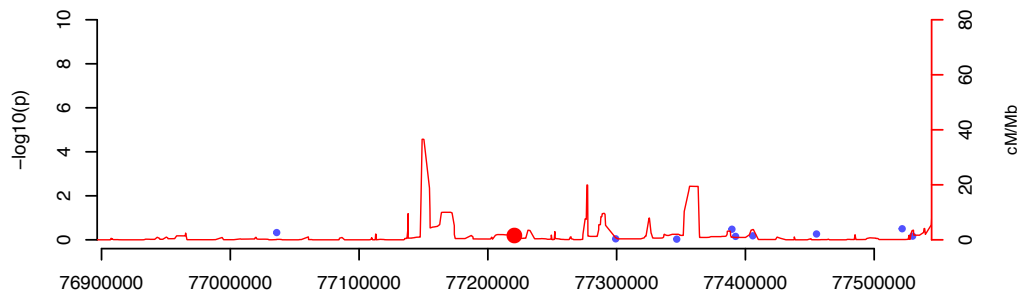

MANTRA meta-analysis: rs7236492 CD

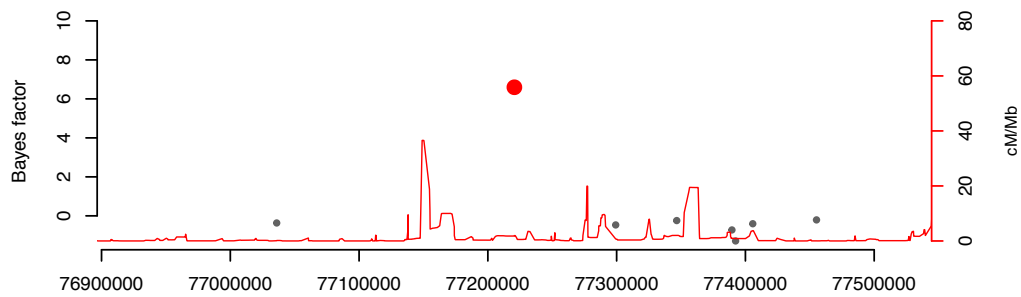

ATP9B

AC018445.1  
NFATC1

CTD

EUR: rs727563 CD

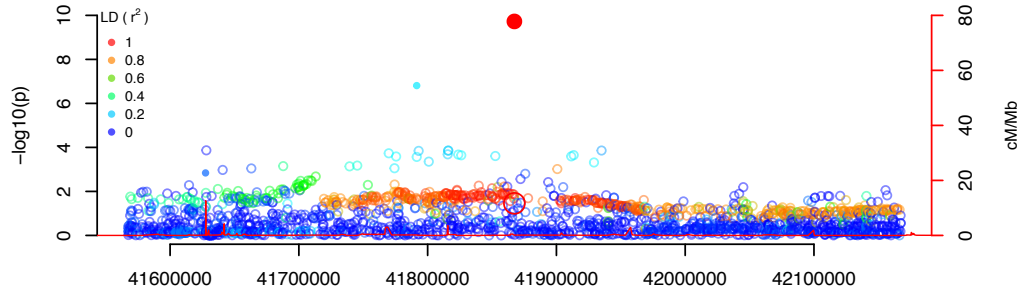

EAS: rs727563 CD

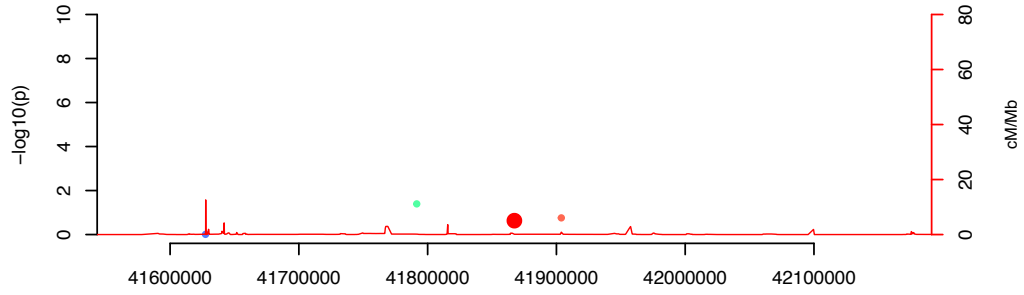

IND: rs727563 CD

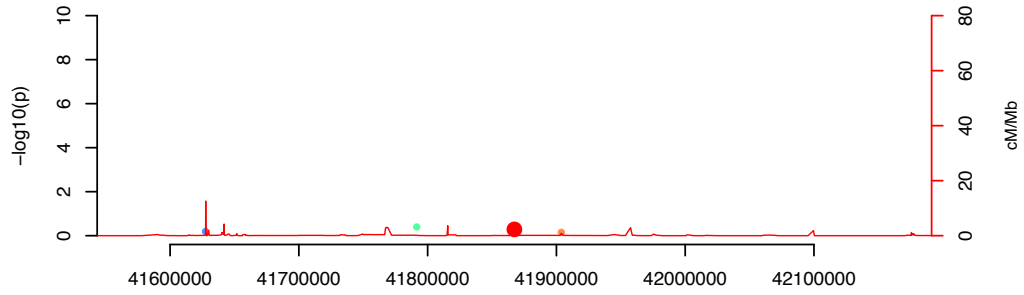

IRA: rs727563 CD

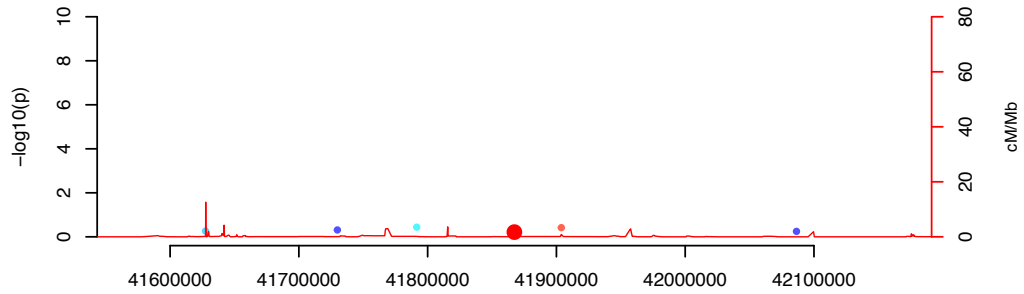

MANTRA meta-analysis: rs727563 CD

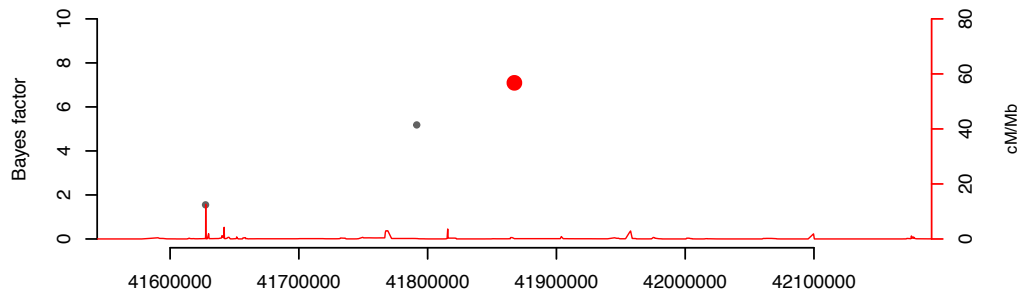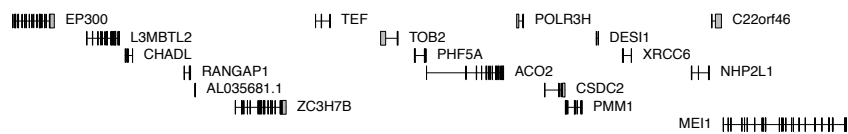

Supplement: 41588_2015_BFng3359_MOESM28_ESM.pdf [file 41588_2015_BFng3359_MOESM28_ESM.pdf]
