# Supplementary material for: Association analyses identify 38 susceptibility loci for inflammatory bowel disease and highlight shared genetic risk across populations
Source: Springer Nature journal article supplement (doi:10.1038/ng.3359), 2015-07-20
Supplement: 41588_2015_BFng3359_MOESM20_ESM.pdf [file 41588_2015_BFng3359_MOESM20_ESM.pdf]

**Association analysis identifies 38 susceptibility loci for  
inflammatory bowel disease and shows pervasive sharing of  
genetic risk across diverse populations**

**Supplementary Materials**

## Table of Contents

### Supplementary Tables

Supplementary Table 1. Association statistics from the transethnic meta analysis for all previously identified and novel loci (*Separate excel file*)

Supplementary Table 2. Minimal p-values for association within each of the 231 IBD loci for each separate ancestral cohort. (*Separate excel file*)

Supplementary Table 3. Heterogeneity of effect of associations among the four ancestry cohorts (*Separate excel file*)

Supplementary table 4. Overlap with other diseases or traits for 38 novel loci

Supplementary Table 5. Association results for the current analysis for all previously reported variants associated to non-European IBD (*Separate excel file*)

Supplementary Table 6. Functional Annotation 38 Novel SNPs - Expression Quantitative Trait Loci (eQTL) for the 38 novel IBD risk loci. (*Separate excel file*)

Supplementary Table 7. ENCODE Annotation 38 novel SNPs (*Separate excel file*)

Supplementary Table 8. Functional Annotation 38 Novel SNPs - Non-synonymous coding SNPs

Supplementary Table 9. Functional Annotation - GRAIL and DAPPLE results (*Separate excel file*)

Supplementary Table 10. GCTA analysis

Supplementary Table 11. Clinical Details and Phenotypic Comparisons European and non-European IBD.

Supplementary Table 12. Per-population Immunochip cohorts

## **Supplementary Figures**

Supplementary Figure 1. Map origin of the samples included in the non-CEU cohort

Supplementary Figure 2. Comparison of the current trans-ethnic association analysis to the previous published IIBDGC GWAS-ImmunoChip analysis

Supplementary Figure 3. Principal Component Analysis all included cohorts

Supplementary Figure 4. Quantile–quantile plots of each individual ancestral

Supplementary Figure 5. Manhattan Plots CD, UC and IBD for Trans-Ethnic Association Analysis (Mantra) all ancestral cohorts combined

Supplementary Figure 6. Manhattan Plots CD, UC and IBD for each association analysis (MMM) for each separate ancestral cohort

Supplementary Figure 7. Regional plots for the 38 novel IBD loci (*separate PDF file*)

Supplementary Figure 8. GRAIL connectivity network

Supplementary Figure 9. Heterogeneity of Odds Ratios between non European and European UC and CD

Supplementary Figure 10. Comparison of Variance explained per risk variant between Non-European and European Populations

Supplementary Figure 11. Dendrogram of included populations

## **Supplementary Note**

Members of the International IBD Genetics Consortium

Members of the International MS Genetics Consortium

**Supplementary Table 4.** Overlap with other diseases or traits for 38 novel loci. For each of the 38 newly identified IBD loci, this table shows whether it overlaps known GWAS loci of other diseases and phenotypes, obtained from the NHGRI GWAS Catalog.

| <b>SNP</b>  | <b>CHR</b> | <b>BP_HG19/n27</b> | <b>Associations all other traits</b>                                                                                                                                                                                    |
|-------------|------------|--------------------|-------------------------------------------------------------------------------------------------------------------------------------------------------------------------------------------------------------------------|
| rs1748195   | 1          | 63049593           | Total cholesterol, LDL cholesterol, Lipid metabolism phenotypes, Triglycerides                                                                                                                                          |
| rs34856868  | 1          | 92554283           | Total cholesterol, Height, Multiple sclerosis                                                                                                                                                                           |
| rs11583043  | 1          | 101466054          |                                                                                                                                                                                                                         |
| rs6025      | 1          | 169519049          | Activated partial thromboplastin time, D-dimer levels, Hemostatic factors and hematological phenotypes, Hippocampal atrophy, QT interval, Soluble levels of adhesion molecules, Venous thromboembolism                  |
| rs10798069  | 1          | 186875459          |                                                                                                                                                                                                                         |
| rs7555082   | 1          | 198598663          | Mean corpuscular hemoglobin, Red blood cell traits                                                                                                                                                                      |
| rs11681525  | 2          | 145492382          | Common traits (Other)                                                                                                                                                                                                   |
| rs4664304   | 2          | 160794008          | Educational attainment, Type 2 diabetes                                                                                                                                                                                 |
| rs3116494   | 2          | 204592021          |                                                                                                                                                                                                                         |
| rs111781203 | 2          | 228660112          | Pulmonary function (interaction)                                                                                                                                                                                        |
| rs35320439  | 2          | 242737341          |                                                                                                                                                                                                                         |
| rs113010081 | 3          | 46457412           | Behcets disease, Celiac disease, Monocyte chemoattractant protein-1, Obesity-related traits                                                                                                                             |
| rs616597    | 3          | 101569726          | Multiple sclerosis                                                                                                                                                                                                      |
| rs724016    | 3          | 141105570          | Height, Prostate cancer, Red blood cell traits                                                                                                                                                                          |
| rs2073505   | 4          | 3444503            | Total cholesterol, Fibrinogen, LDL cholesterol, Triglycerides                                                                                                                                                           |
| rs4692386   | 4          | 26132361           | Rheumatoid arthritis, Type 1 diabetes                                                                                                                                                                                   |
| rs6856616   | 4          | 38325036           | Allergic sensitization, Helicobacter pylori serologic status, Self-reported allergy                                                                                                                                     |
| rs2189234   | 4          | 106075498          | Pulmonary function, Pulmonary function (interaction)                                                                                                                                                                    |
| rs395157    | 5          | 38867732           |                                                                                                                                                                                                                         |
| rs4703855   | 5          | 71693899           |                                                                                                                                                                                                                         |
| rs564349    | 5          | 172324978          |                                                                                                                                                                                                                         |
| rs7773324   | 6          | 382559             | Basal cell carcinoma, Black vs. blond hair color, Black vs. red hair color, Chronic lymphocytic leukemia, Eye color, Freckles, Freckling, Hair color, Non-melanoma skin cancer, Progressive supranuclear palsy, Tanning |
| rs13204048  | 6          | 3420406            | Crohns disease                                                                                                                                                                                                          |
| rs7758080   | 6          | 149577079          | Alopecia areata, Breast cancer                                                                                                                                                                                          |
| rs1077773   | 7          | 17442679           | Caffeine consumption, Coffee consumption, HDL cholesterol, Metabolic traits                                                                                                                                             |
| rs2538470   | 7          | 148220448          |                                                                                                                                                                                                                         |

|            |    |           |                                                                                                                                                                                                                                                                                                                                                                                                                                                                                                                                                                                                                                                                                                                                                                          |
|------------|----|-----------|--------------------------------------------------------------------------------------------------------------------------------------------------------------------------------------------------------------------------------------------------------------------------------------------------------------------------------------------------------------------------------------------------------------------------------------------------------------------------------------------------------------------------------------------------------------------------------------------------------------------------------------------------------------------------------------------------------------------------------------------------------------------------|
| rs17057051 | 8  | 27227554  | Alzheimers disease, Alzheimers disease (late onset)                                                                                                                                                                                                                                                                                                                                                                                                                                                                                                                                                                                                                                                                                                                      |
| rs7011507  | 8  | 49129242  |                                                                                                                                                                                                                                                                                                                                                                                                                                                                                                                                                                                                                                                                                                                                                                          |
| rs3740415  | 10 | 104232716 | Cardiac hypertrophy, Interstitial lung disease, Telomere length, Uterine fibroids                                                                                                                                                                                                                                                                                                                                                                                                                                                                                                                                                                                                                                                                                        |
| rs7954567  | 12 | 6491125   | Ankylosing spondylitis, Coagulation factor levels, Mean platelet volume, Multiple sclerosis, Platelet counts, Primary biliary cirrhosis                                                                                                                                                                                                                                                                                                                                                                                                                                                                                                                                                                                                                                  |
| rs653178   | 12 | 112007756 | Alcohol consumption, Alcohol consumption<br>Biomedical quantitative traits, Blood pressure, Celiac disease, Celiac disease and Rheumatoid arthritis, Total cholesterol, Chronic kidney disease, Coronary heart disease, Diastolic blood pressure, Drinking behavior, Esophageal cancer, Gamma glutamyl transpeptidase, Glycemic traits, HDL cholesterol, Hematocrit, Hematological and biochemical traits, Hematological parameters, Hemoglobin, LDL cholesterol, Mean platelet volume, Metabolite levels, Renal function-related traits (BUN),Renal function-related traits (sCR), Response to alcohol consumption (flushing response),Tetralogy of Fallot, Type 1 diabetes, Upper aerodigestive tract cancers, Urate levels, mean corpuscular hemoglobin concentration |
| rs11064881 | 12 | 120146925 |                                                                                                                                                                                                                                                                                                                                                                                                                                                                                                                                                                                                                                                                                                                                                                          |
| rs9525625  | 13 | 43018030  | Bone mineral density, Cortical thickness, End-stage coagulation                                                                                                                                                                                                                                                                                                                                                                                                                                                                                                                                                                                                                                                                                                          |
| rs3853824  | 17 | 54880993  | Breast cancer, Urate levels                                                                                                                                                                                                                                                                                                                                                                                                                                                                                                                                                                                                                                                                                                                                              |
| rs17736589 | 17 | 76737118  | Retinal arteriolar caliber                                                                                                                                                                                                                                                                                                                                                                                                                                                                                                                                                                                                                                                                                                                                               |
| rs9319943  | 18 | 56879827  |                                                                                                                                                                                                                                                                                                                                                                                                                                                                                                                                                                                                                                                                                                                                                                          |
| rs7236492  | 18 | 77220616  |                                                                                                                                                                                                                                                                                                                                                                                                                                                                                                                                                                                                                                                                                                                                                                          |
| rs727563   | 22 | 41867377  |                                                                                                                                                                                                                                                                                                                                                                                                                                                                                                                                                                                                                                                                                                                                                                          |

**Supplementary Table 8.** Functional annotation of 38 Novel SNPs – Non-synonymous coding SNPs. Non-synonymous coding SNPs in high LD ( $R^2 > 0.8$  in either European (CEU+FIN+GBR+IBS+TSI) or East Asian (CHB+CHD+JPT) 1000 Genomes Phase I samples) with a novel associated variant were identified. Functional consequences (polyPhen, PhastCons and GERP scores) were identified using functionGVS (<http://snp.gs.washington.edu/SeattleSeqAnnotation134/>)

|   | Position<br>(hg19/GRCh37) | SNP        | cSNP       | R <sup>2</sup> Eur | R <sup>2</sup> Eas | Type     | Gene   | polyPhen<br>score | PhastCons<br>score | GERP<br>score | Amino<br>acid<br>change | Protein<br>position | DNA<br>position |
|---|---------------------------|------------|------------|--------------------|--------------------|----------|--------|-------------------|--------------------|---------------|-------------------------|---------------------|-----------------|
| 1 | 92326871                  | rs34856868 | rs34856868 | 1                  | 1                  | missense | BTBD8  | benign            | 0.859              | 3.42          | VAL,ILE                 | 60/379              | 178             |
| 2 | 160502254                 | rs4664304  | rs3828323  | 0.78               | 0.84               | missense | PLA2R1 | benign            | 0                  | -3            | GLY,SER                 | 1106/1325           | 3316            |
| 4 | 3414301                   | rs2073505  | rs16844401 | 0.25               | 0.8                | missense | HGFAC  | benign            | 1                  | 4.02          | ARG,HIS                 | 509/656             | 1526            |

**Supplementary Table 10.** Pairwise genetic correlation ( $r_G$ ) between European and non-European cohorts tagged by ImmunoChip SNPs.  $r_G$  and SE were estimated using the bivariate linear mix model implemented in GCTA.

| Phenotype          | European vs. | $r_G$ | SE   | P-value ( $H_1: r_G > 0$ ) | P-value ( $H_1: r_G < 1$ ) |
|--------------------|--------------|-------|------|----------------------------|----------------------------|
| Crohn's disease    | East Asian   | 0.76  | 0.04 | <2.22E-16                  | 4.47E-14                   |
|                    | Indian       | 0.56  | 0.09 | 6.58E-10                   | 0.000343                   |
|                    | Iranian      | 0.82  | 0.34 | 0.000000506                | 0.357                      |
| Ulcerative colitis | East Asian   | 0.79  | 0.04 | <2.22E-16                  | 6.61E-09                   |
|                    | Indian       | 0.84  | 0.05 | <2.22E-16                  | 0.000823                   |
|                    | Iranian      | 0.67  | 0.08 | 2.61E-15                   | 0.000675                   |

**Supplementary table 11a.** Disease demographics in European and non-European IBD patients. Complete data available: <sup>a</sup>77%; <sup>b</sup>81%; <sup>c</sup>72%; <sup>d</sup>52%.

|                                                   | CD (N=21281)       |                       |           | UC (N=18533)       |                       |           |
|---------------------------------------------------|--------------------|-----------------------|-----------|--------------------|-----------------------|-----------|
|                                                   | European (N=19290) | Non-European (N=1991) | P value   | European (N=15838) | Non-European (N=2695) | P value   |
| <b>Gender, male, n (%)</b>                        | 8467 (45.1%)       | 1325 (67.1%)          | 7.091E-78 | 7870 (52.1%)       | 1319 (50.4%)          | 0.09808   |
| <b>Age of diagnosis, mean (±SD)</b>               | 28.39 (±14.156)    | 27.58 (±12.192)       | 0.013     | 34.10 (±15.776)    | 35.76 (±13.685)       | 6.203E-08 |
| <b>Smoking history<sup>a</sup>, n (%)</b>         |                    |                       |           |                    |                       |           |
| Never                                             | 8737 (57.3%)       | 376 (77.8%)           | 7.23E-19  | 7174 (59.8%)       | 2102 (87.0%)          | 2.15E-180 |
| Ex                                                | 2359 (15.5%)       | 49 (10.1%)            |           | 3448 (28.7%)       | 47 (1.9%)             |           |
| Current                                           | 4159 (27.3%)       | 58 (12.0%)            |           | 1382 (11.5%)       | 267 (11.1%)           |           |
| <b>Family history of IBD<sup>b</sup></b>          | 4438 (28.3%)       | 88 (5.6%)             | 4.783E-85 | 2763 (21.8%)       | 151 (6.2%)            | 2.328E-70 |
| <b>Primary Sclerosing Cholangitis<sup>c</sup></b> | 152 (1.1%)         | 12 (0.8%)             | 0.205     | 374 (3.2%)         | 34 (1.4%)             | 2.84E-06  |
| <b>Ankylosing Spondylitis<sup>d</sup></b>         | 1006 (9.6%)        | 14 (0.9%)             | 1.081E-30 | 535 (7.0%)         | 12 (0.5%)             | 1.771E-34 |



**Supplementary Table 11b.** Disease phenotype of IBD in European and non-European patients. Complete data available: <sup>a</sup>86%; <sup>b</sup>83% (not mutually exclusive); <sup>c</sup>84%; <sup>d</sup>84%; <sup>e</sup>85%; <sup>f</sup>82%.

| Demographics                          | European      | non-European  | P value   |
|---------------------------------------|---------------|---------------|-----------|
| <b>CD location<sup>a</sup>, n (%)</b> |               |               |           |
| L1 (ileal)                            | 4,916 (29.6%) | 498 (34.8%)   | 3.93E-05  |
| L2 (colon)                            | 3,921 (23.6%) | 269 (18.8%)   | 3.47E-05  |
| L3 (ileocolon)                        | 7,778 (46.8%) | 665 (46.4%)   | 0.7852    |
| Upper gastrointestinal                | 1,738 (46.8%) | 113 (7.3%)    | 8.693E-10 |
| <b>CD behavior<sup>b</sup>, n (%)</b> |               |               |           |
| B1 (Inflammatory)                     | 7,478 (46.4%) | 408 (29.9%)   | 4.279E-32 |
| B2 (Stricturing)                      | 4,453 (27.6%) | 587 (43.0%)   | 2.738E-33 |
| B3 (Penetrating)                      | 4,174 (25.9%) | 393 (28.8%)   | 0.02034   |
| B1p (Perianal) <sup>c</sup>           | 4,516 (27.8%) | 663 (42.1%)   | 5.355E-33 |
| <b>UC location<sup>d</sup>, n (%)</b> |               |               |           |
| E1 (Proctitis)                        | 1,726 (12.9%) | 285 (14.2%)   | 0.11      |
| E2 (Left sided)                       | 5,097 (38.2%) | 1,033 (51.6%) | 4.655E-30 |
| E3 (Extensive)                        | 6,526 (48.9%) | 686(34.2%)    | 1.522E-34 |
| <b>Surgery, n (%)</b>                 |               |               |           |
| CD (abdominal surgery) <sup>e</sup>   | 8,656 (52.8%) | 728 (48.1%)   | 5.42E-04  |
| UC (colectomy) <sup>f</sup>           | 2,385 (18.5%) | 100 (4.1%)    | 1.229E-69 |

**Supplementary Table 12.** Per-population ImmunoChip cohorts

| Per-population ImmunoChip cohorts |       |       |          |       |
|-----------------------------------|-------|-------|----------|-------|
| Population                        | CD    | UC    | Controls | Total |
| European                          | 17897 | 13768 | 33977    | 65642 |
| East Asian                        | 1690  | 1134  | 3719     | 6543  |
| Indian                            | 184   | 1239  | 990      | 2413  |
| Iranian                           | 151   | 397   | 342      | 890   |

**Supplementary Figure 1:** Map depicting the origin of the samples in the non-European cohort

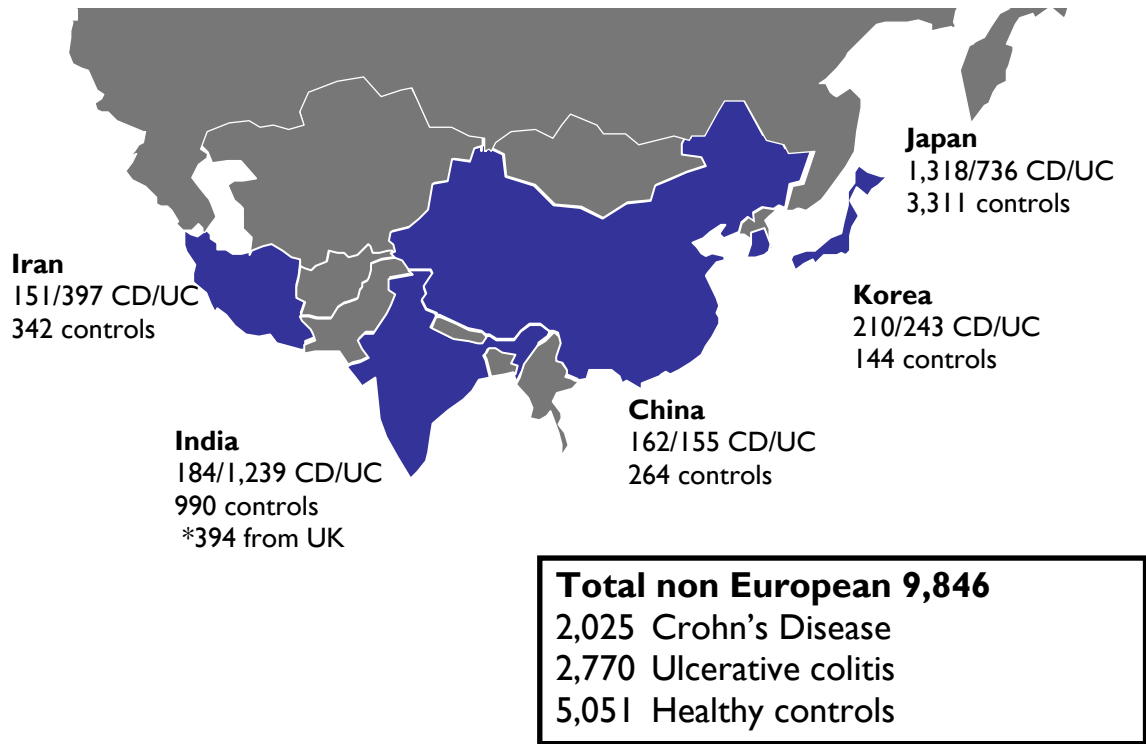

**Supplementary Figure 2:** Comparison of cohorts of the current trans-ethnic association analysis to the previous IIBDGC GWAS-ImmunoChip analysis<sup>6</sup>

Jostins et al.

|                                            |                                          |                                                  |
|--------------------------------------------|------------------------------------------|--------------------------------------------------|
| GWAS EU<br>12,882 cases<br>21,770 controls | overlap<br>5,154 cases<br>6,465 controls | ImmunoChip EU<br>25,683 cases<br>15,977 controls |
|--------------------------------------------|------------------------------------------|--------------------------------------------------|

Transethnic analyses

|                                            |                                          |                                                  |                                         |
|--------------------------------------------|------------------------------------------|--------------------------------------------------|-----------------------------------------|
| GWAS EU<br>12,924 cases<br>21,770 controls | overlap<br>6,392 cases<br>7,262 controls | ImmunoChip EU<br>25,273 cases<br>26,715 controls | non EU<br>4,795 cases<br>5,051 controls |
|--------------------------------------------|------------------------------------------|--------------------------------------------------|-----------------------------------------|

---

**Supplementary Figure 3:** Principal Component Analysis all included cohorts. Principal components analysis (PCA) was performed with the first two PCs estimated from 1000 Genomes Phase I samples and projected onto each of the European and non-European samples

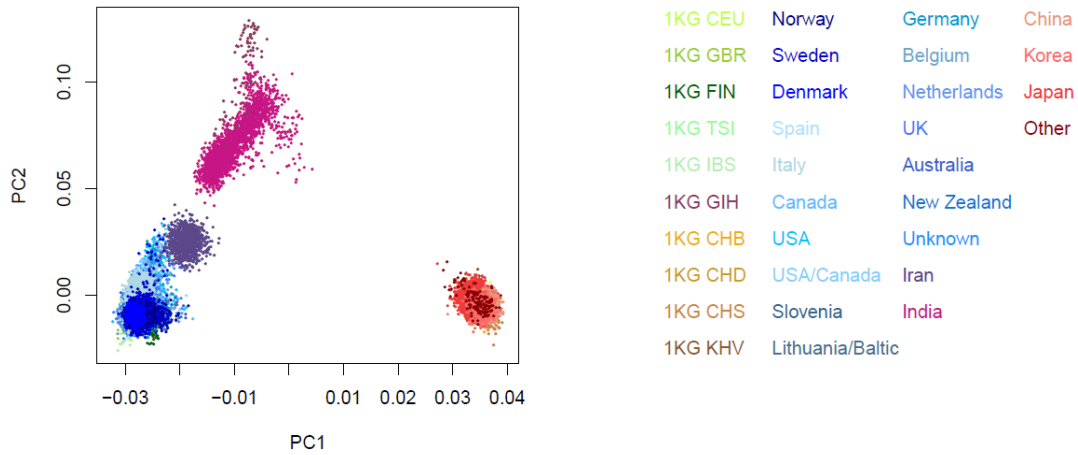

**Supplementary Figure 4:** Quantile–quantile plots for the p-values of each individual ancestral group - MMM analysis. The x-axis indicates the expected distribution of  $-\log_{10}(P)$  values. The y-axis indicates the observed distribution of  $-\log_{10}(P)$  values. The overall inflation of the observed distribution of association test statistics is reflected by the lambda ( $\lambda$ ). Considering the size of the European cohort a lambda equivalent for 1000 cases and 1000 controls is also provided. a. East Asian b. Indian c. Iranian d. European

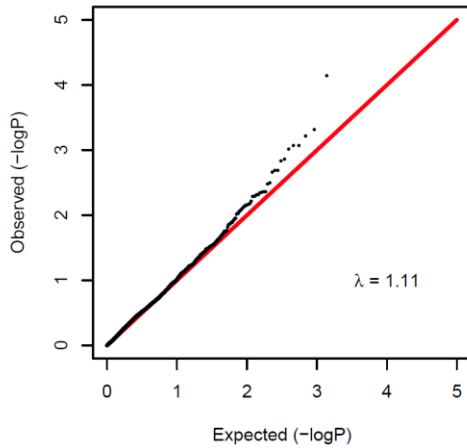

a

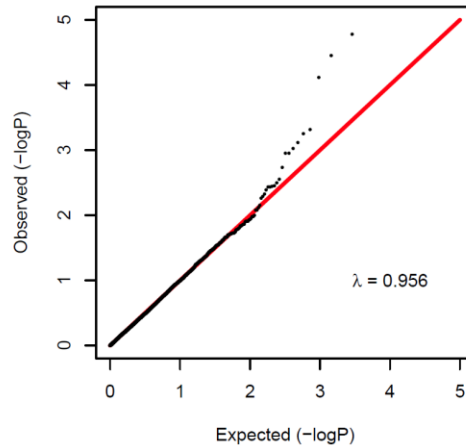

b

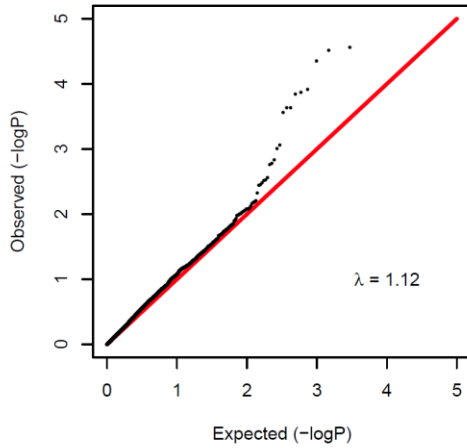

c

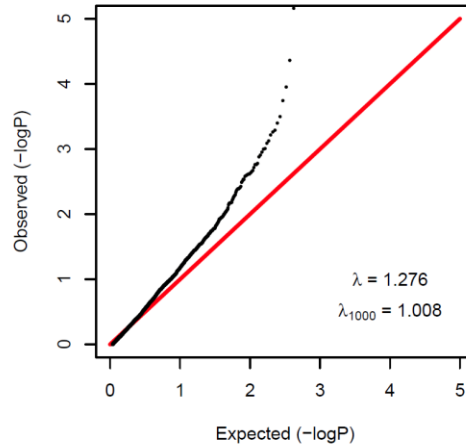

d

**Supplementary Figure 5:** Manhattan plots for transethnic association analysis. MANTRA association results are plotted for Crohn's disease (CD), ulcerative colitis (UC) and combined inflammatory bowel disease (IBD). The x-axis indicates the position of all tested SNPs per chromosome. The y-axis shows the strength of association ( $\log_{10}$  Bayes factor)

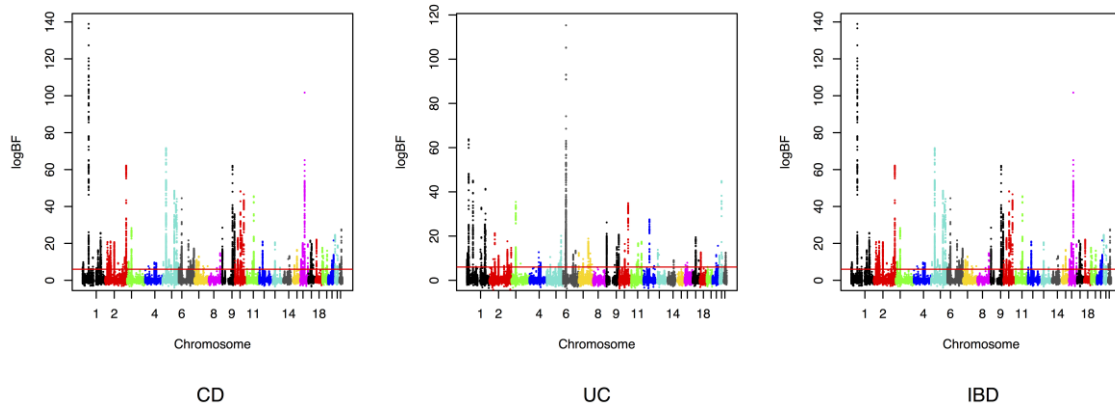

**Supplementary Figure 6:** Manhattan for each separate ancestral cohort. MMM association results are plotted for each ancestral cohort. The x-axis of each plot indicates the position of all tested SNPs per chromosome. The y-axis shows the strength of association ( $-\log_{10} P$ -value). In rows from top to bottom: East Asian, Indian, Iranian and European. In columns from left to right: Crohn's disease (CD), ulcerative colitis (UC) and combined inflammatory bowel disease (IBD).

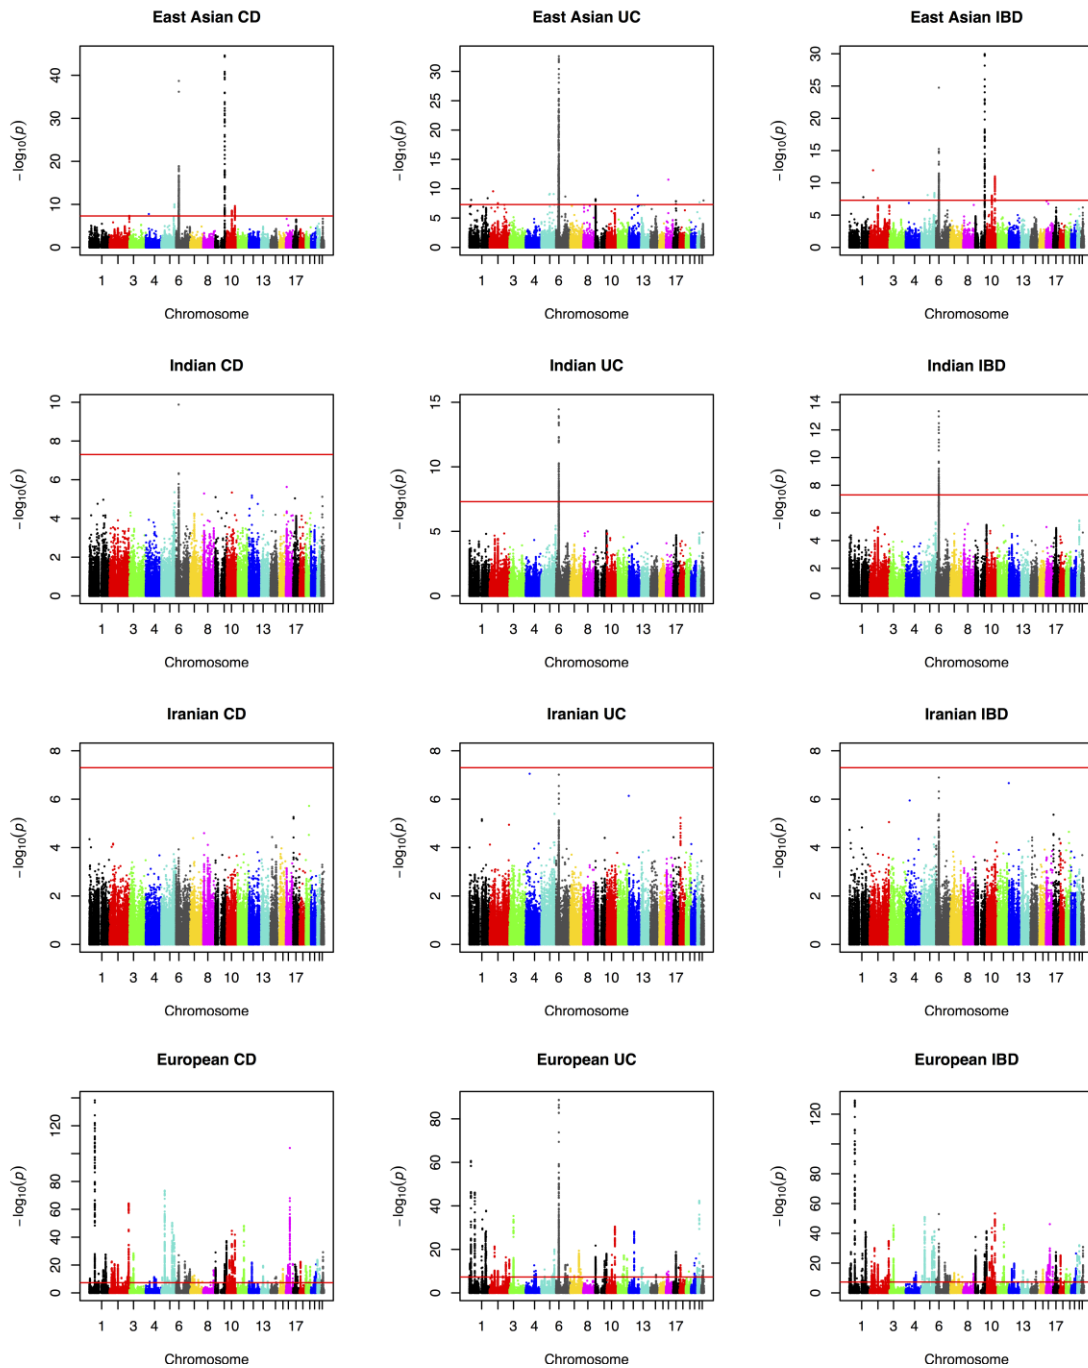

**Supplementary Figure 8: GRAIL Connectivity Network.**

The GRAIL network includes all genes that reside in loci associated with IBD, have a GRAIL p-value $<0.05$  and interact with at least one other GRAIL gene. The edge weights are proportional to the connection scores and we only plotted edges with scores  $\geq 0.5$ . We colored the previous GRAIL genes in light blue, newly connected genes in previously identified loci in dark blue, and genes from newly associated loci in gold. Genes in loci that have  $BF < 6$  are shown as diamonds. As in the previous publication, only the main cluster was shown in this figure. <sup>6</sup>

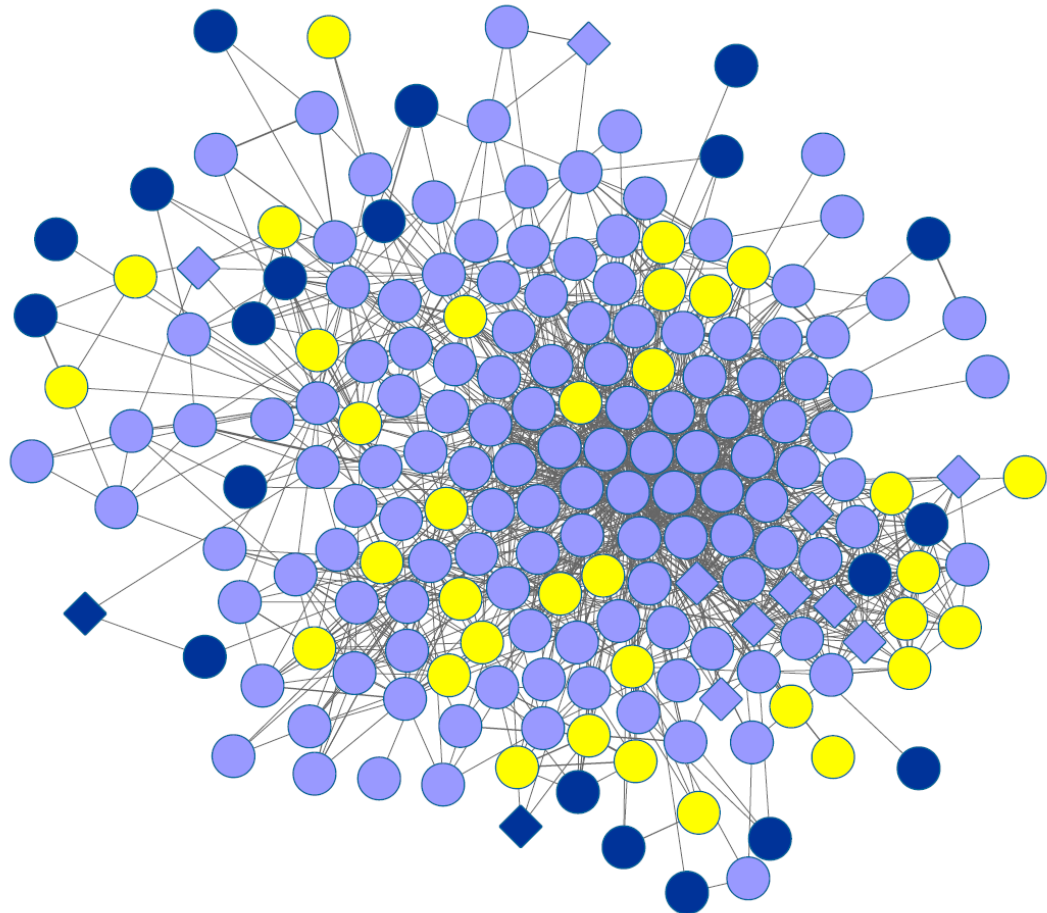



**Supplementary Figure 9:** Odds ratio comparison between European and non-European populations at SNPs associated with CD or UC or IBD (both). For each SNP, ORs (on log-scale) were estimated within each population for each phenotype. The colour of each point denotes the association P-value for that phenotype in the non-European population. The red line indicates the best fitting linear regression line, weighted by the inverse of the variance of the log ORs in the non-European population. The regression coefficient, significance and goodness of fit are listed in red.

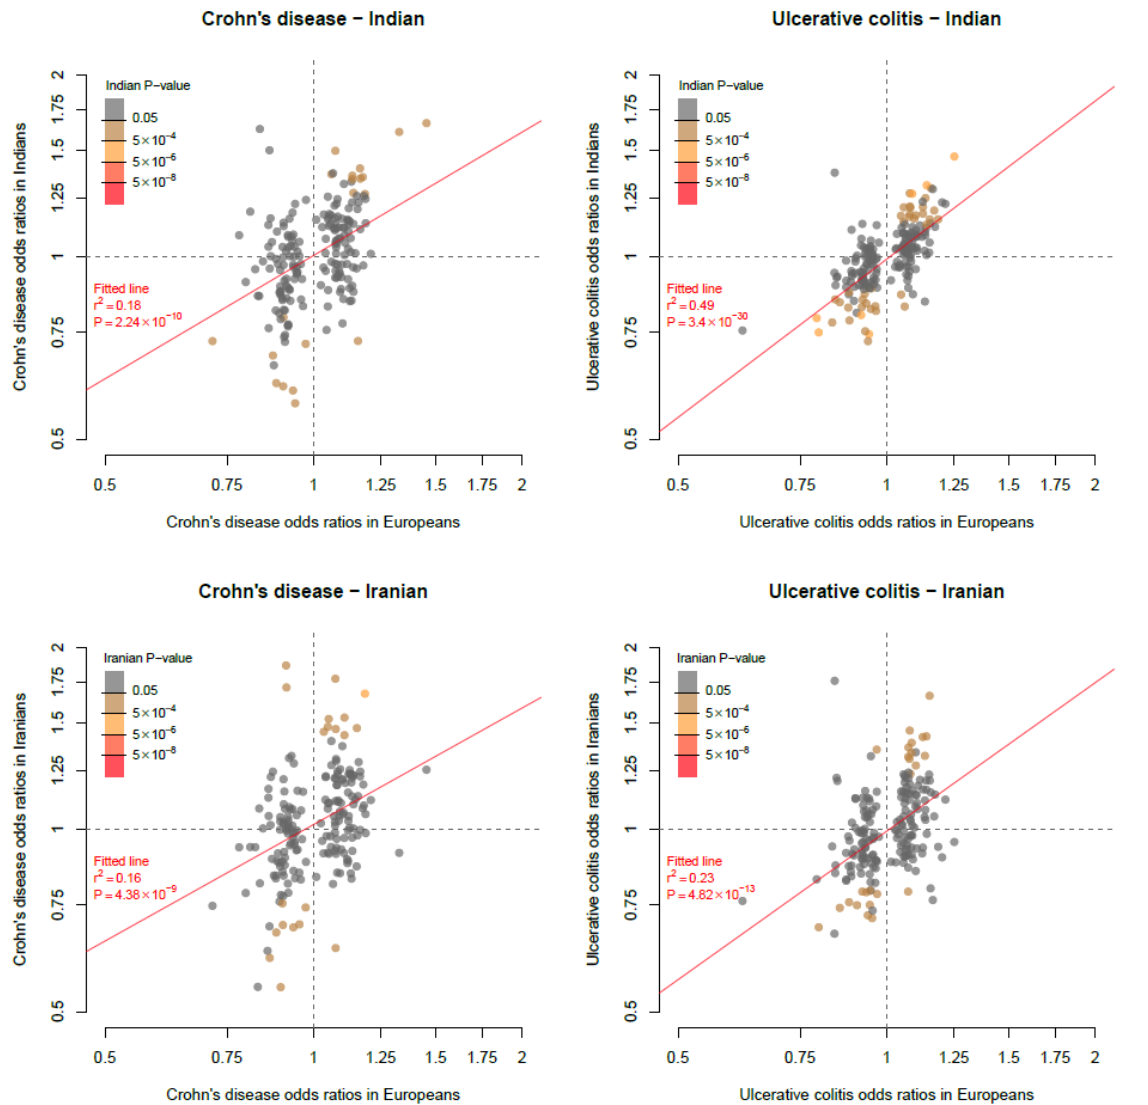

**Supplementary Figure 10:** Comparison of Variance explained per risk variant between Non-European and European Populations. Each box represents an independently associated SNP with that disease. Only SNPs with an association P-value < 0.01 are included in the non-European panel. The size of each box is proportional to the amount of variance explained in disease liability for that variant. The colours of the boxes denote whether the difference in variance explained is due to differences in allele frequencies ( $F_{st} > 0.1$ /monomorphic in the non-European population), significant heterogeneity of odds ratios ( $P < 2.5 \times 10^{-4}$ ) or both.

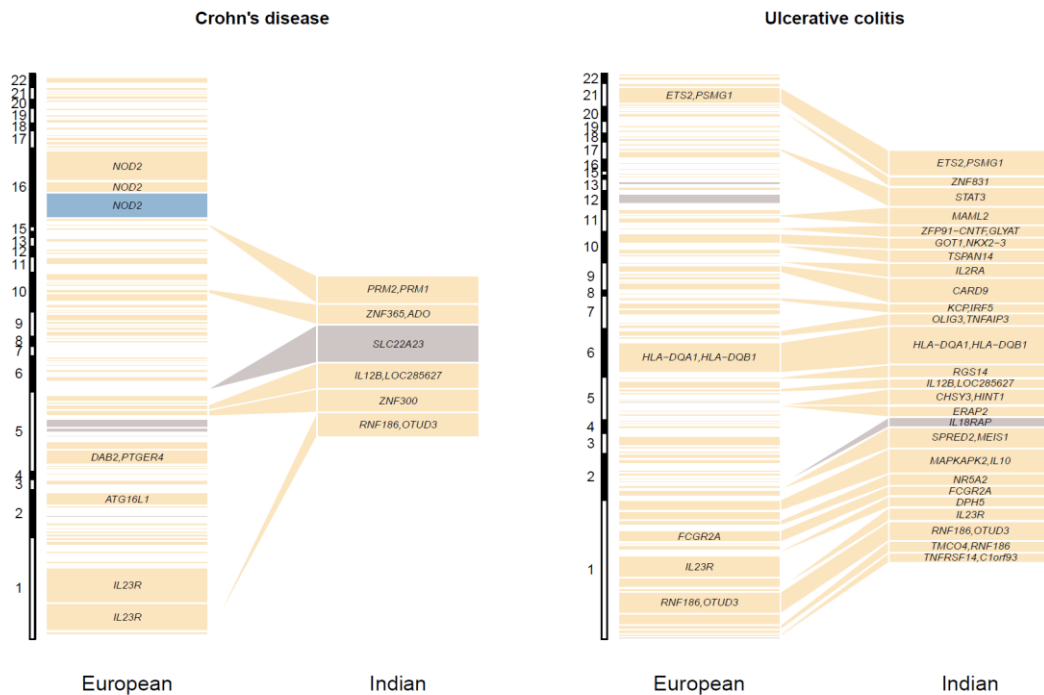

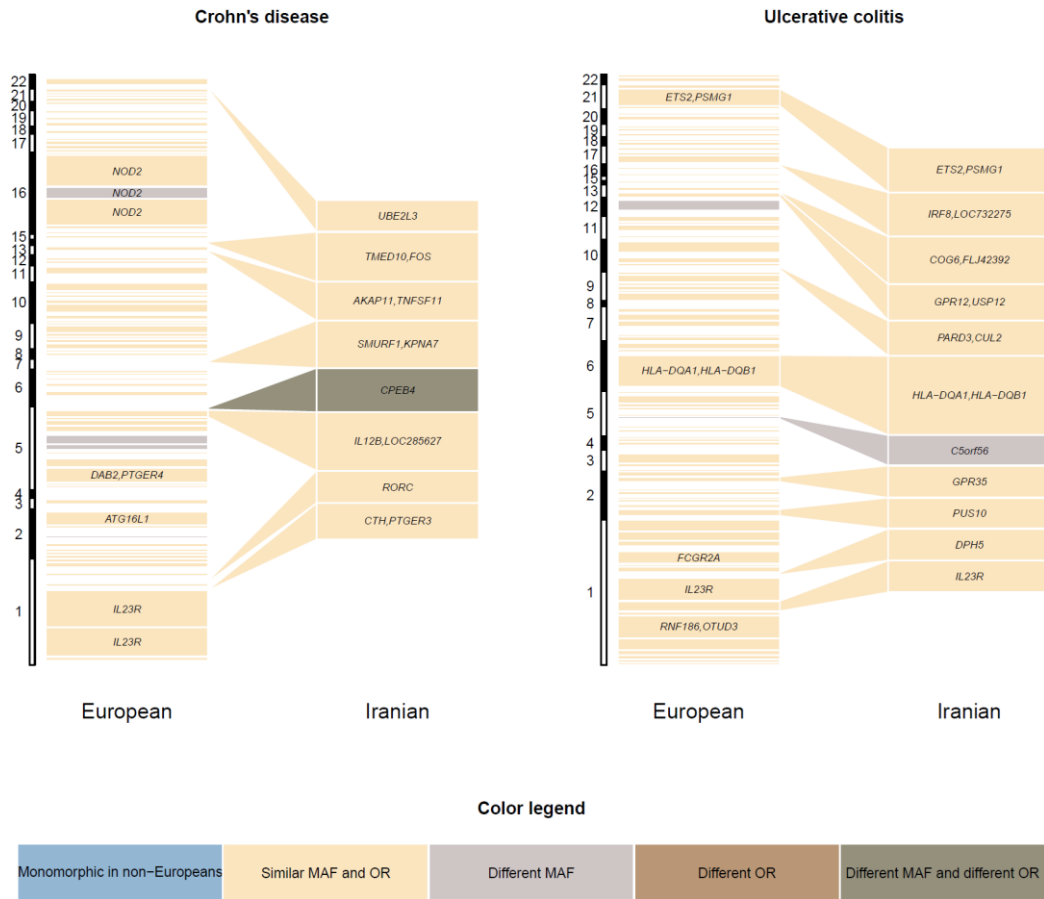

**Supplementary Figure 11:** Dendrogram, generated from the data used in the MANTRA analysis, showing the clustering of the populations included in our study.

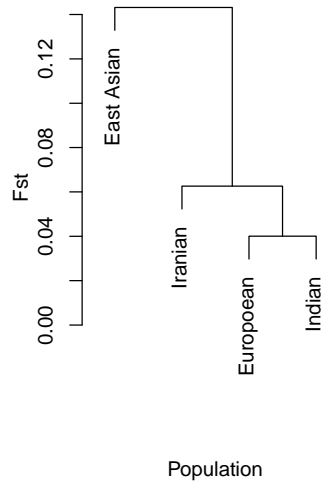

## **Supplementary Note**

### **Members of the International IBD Genetics Consortium**

Shifteh Abedian<sup>9,26</sup>, Clara Abraham<sup>27</sup>, Jean-Paul Achkar<sup>28,29</sup>, Tariq Ahmad<sup>30</sup>, Rudi Alberts<sup>2</sup>, Behrooz Alizadeh<sup>23</sup>, Leila Amininejad<sup>31,32</sup>, Ashwin N Ananthakrishnan<sup>33,34</sup>, Vibeke Andersen<sup>35,36</sup>, Carl A Anderson<sup>1</sup>, Jane M Andrews<sup>37</sup>, Vito Annese<sup>38,39</sup>, Guy Aumais<sup>40,41</sup>, Leonard Baidoo<sup>42</sup>, Robert N Baldassano<sup>43</sup>, Tobias Balschun<sup>44</sup>, Peter A Bampton<sup>45</sup>, Murray Barclay<sup>46</sup>, Jeffrey C Barrett<sup>1</sup>, Theodore M Bayless<sup>47</sup>, Johannes Bethge<sup>48</sup>, Claire Bewshea<sup>30</sup>, Joshua C Bis<sup>49</sup>, Alain Bitton<sup>50</sup>, Thelma BK<sup>16</sup>, Gabrielle Boucher<sup>51</sup>, Oliver Brain<sup>52</sup>, Stephan Brand<sup>53</sup>, Steven R Brant<sup>47</sup>, Carsten Büning<sup>54</sup>, Jae Hee Cheon<sup>10</sup>, Angela Chew<sup>55,56</sup>, Judy H Cho<sup>57</sup>, Isabelle Cleynen<sup>58</sup>, Ariella Cohain<sup>59</sup>, Rachel Cooney<sup>60</sup>, Anthony Croft<sup>61</sup>, Mark J Daly<sup>4,62</sup>, Mauro D'Amato<sup>63</sup>, Silvio Danese<sup>64</sup>, Naser Ebrahim Daryani<sup>12,65</sup>, Dirk De Jong<sup>66</sup>, Katrina M de Lange<sup>1</sup>, Martine De Vos<sup>67</sup>, Goda Denapiene<sup>68</sup>, Lee A Denson<sup>69</sup>, Kathy L Devaney<sup>33</sup>, Olivier Dewit<sup>70</sup>, Renata D'Inca<sup>71</sup>, Hazel E Drummond<sup>72</sup>, Marla Dubinsky<sup>73</sup>, Richard H Duerr<sup>42,74</sup>, Cathryn Edwards<sup>75</sup>, David Ellinghaus<sup>44</sup>, Motohiro Esaki<sup>76</sup>, Jonah Essers<sup>77,78</sup>, Lynnette R Ferguson<sup>79</sup>, Eleonora A Festen<sup>2</sup>, Philip Fleshner<sup>80</sup>, Tim Florin<sup>81</sup>, Denis Franchimont<sup>31,32</sup>, Andre Franke<sup>44</sup>, Karin Fransen<sup>3</sup>, Yuta Fuyuno<sup>13</sup>, Richard Gearry<sup>46,82</sup>, Michel Georges<sup>83,84</sup>, Christian Gieger<sup>85</sup>, Jürgen Glas<sup>50</sup>, Philippe Goyette<sup>51</sup>, Todd Green<sup>62,77</sup>, Anne M Griffiths<sup>86</sup>, Stephen L Guthery<sup>87</sup>, Hakon Hakonarson<sup>43</sup>, Jonas Halfvarson<sup>88,89</sup>, Katherine Hanigan<sup>61</sup>, Talin Haritunians<sup>80</sup>, Ailsa Hart<sup>14</sup>, Chris Hawkey<sup>90</sup>, Nicholas K Hayward<sup>91</sup>, Matija Hedl<sup>27</sup>, Paul Henderson<sup>92</sup>, Georgina L Hold<sup>93</sup>, Xinli Hu<sup>94</sup>, Hailiang Huang<sup>4,62</sup>, Ken Y Hui<sup>57</sup>, Marcin Imielinski<sup>43</sup>, Andrew Ippoliti<sup>80</sup>, Omid Jazayeri<sup>3</sup>, Laimas Jonaitis<sup>95</sup>, Luke Jostins<sup>8</sup>, Garima Juyal<sup>16</sup>, Ramesh Chandra Juyal<sup>15</sup>, Rahul Kalla<sup>72</sup>, Tom H Karlsen<sup>96,97,98</sup>, Takaaki Kawaguchi<sup>99</sup>, Nicholas A Kennedy<sup>72</sup>, Mohammed Azam Khan<sup>18</sup>, Won Ho Kim<sup>10</sup>, Takanari Kitazono<sup>76</sup>, Gediminas Kiudelis<sup>95</sup>, Michiaki Kubo<sup>13</sup>, Subra Kugathasan<sup>100</sup>, Limas Kupcinskas<sup>101</sup>, Christopher A Lamb<sup>102</sup>, Anna Latiano<sup>38</sup>, Debby Laukens<sup>67</sup>, Ian C Lawrance<sup>56</sup>, James C Lee<sup>7</sup>, Charlie W Lees<sup>72</sup>, Marcis Leja<sup>103</sup>, Nina Lewis<sup>90</sup>, Johan Van Limbergen<sup>86</sup>, Paolo Lionetti<sup>104</sup>, Jimmy Z Liu<sup>1</sup>, Edouard Louis<sup>105</sup>, Yang Luo<sup>1</sup>, Gillian Mahy<sup>106</sup>, Masoud Mohammad Malekzadeh<sup>9,26</sup>, Reza Malekzadeh<sup>9,26</sup>, John Mansfield<sup>107</sup>, Suzie Marriott<sup>30</sup>, Dunecan Massey<sup>7</sup>, Christopher G Mathew<sup>108</sup>, Toshiyuki Matsui<sup>109</sup>, Dermot PB McGovern<sup>80</sup>, Vandana Midha<sup>19</sup>, Raquel Milgrom<sup>110</sup>, Samaneh Mirzaei<sup>9,26</sup>, Mitja Mitrovic<sup>3,111</sup>, Grant W Montgomery<sup>91</sup>, Satoshi Motoya<sup>112</sup>, Craig Mowat<sup>113</sup>, William G Newman<sup>18</sup>, Aylwin Ng<sup>33,114</sup>, Siew C Ng<sup>5</sup>, Sok Meng Evelyn Ng<sup>27</sup>, Susanna Nikolaus<sup>48</sup>, Elaine R Nimmo<sup>72</sup>, Kaida Ning<sup>27</sup>, Markus Nöthen<sup>115</sup>, Ioannis Oikonomou<sup>27</sup>, Timothy R Orchard<sup>20</sup>, Orazio Palmieri<sup>38</sup>, Miles Parkes<sup>7</sup>, Anne Phillips<sup>113</sup>, Cyriel Y Ponsioen<sup>116</sup>, Urõs Potocnik<sup>111,117</sup>, Hossein Poustchi<sup>9,26</sup>, Natalie J Prescott<sup>108</sup>, Deborah D Proctor<sup>27</sup>, Graham Radford-Smith<sup>61,118</sup>, Jean-Francois Rahier<sup>119</sup>, Soumya Raychaudhuri<sup>94</sup>, Miguel Regueiro<sup>42</sup>, Florian Rieder<sup>28</sup>, John D Rioux<sup>41,51</sup>, Stephan Ripke<sup>4,62</sup>, Rebecca Roberts<sup>46</sup>, Richard K Russell<sup>120</sup>, Jeremy D Sanderson<sup>121</sup>, Miquel Sans<sup>122</sup>, Jack Satsangi<sup>72</sup>, Eric E Schadt<sup>59</sup>

Stefan Schreiber<sup>44,48</sup>, L Philip Schumm<sup>123</sup>, Regan Scott<sup>42</sup>, Mark Seielstad<sup>124,125</sup>,  
Tejas Shah<sup>1</sup>, Yashoda Sharma<sup>27</sup>, Mark S Silverberg<sup>110</sup>, Alison Simmons<sup>52</sup>, Lisa A Simms<sup>61</sup>,  
Abhey Singh<sup>30</sup>, Jurgita Skieceviciene<sup>95</sup>, Ajit Sood<sup>126</sup>, Sarah L Spain<sup>108</sup>,  
A. Hillary Steinhart<sup>110</sup>, Joanne M Stempak<sup>110</sup>, Laura Stronati<sup>127</sup>, Joseph JY Sung<sup>5</sup>,  
Yasuo Suzuki<sup>128</sup>, Jurgita Sventoraityte<sup>101</sup>, Atsushi Takahashi<sup>6</sup>, Masakazu Takazoe<sup>129</sup>,  
Hiroki Tanaka<sup>112</sup>, Stephan R Targan<sup>80</sup>, Kirstin M Taylor<sup>121</sup>, Anje ter Velde<sup>116</sup>,  
Emilie Theatre<sup>83,84</sup>, Leif Torkvist<sup>130</sup>, Mark Tremelling<sup>131</sup>, Holm H Uhlig<sup>132</sup>,  
Homayon Vahedi<sup>9,26</sup>, Andrea van der Meulen<sup>133</sup>, Suzanne van Sommeren<sup>2</sup>,  
Eric Vasiliauskas<sup>80</sup>, Nicholas T Ventham<sup>72</sup>, Severine Vermeire<sup>58,134</sup>, Hein W Verspaget<sup>133</sup>,  
Thomas Walters<sup>86,135</sup>, Kai Wang<sup>43</sup>, Ming-Hsi Wang<sup>28,47</sup>, Rinse K Weersma<sup>2</sup>, Zhi Wei<sup>136</sup>,  
David Whiteman<sup>91</sup>, Cisca Wijmenga<sup>3</sup>, David C Wilson<sup>92,120</sup>, Juliane Winkelmann<sup>137,138</sup>,  
Ramnik J Xavier<sup>33,62</sup>, Tetsuhiro Yamada<sup>99</sup>, Keiko Yamazaki<sup>13</sup>, Sebastian Zeissig<sup>48</sup>,  
Bin Zhang<sup>59</sup>, Clarence K Zhang<sup>139</sup>, Hu Zhang<sup>140,141</sup>, Wei Zhang<sup>27</sup>, Hongyu Zhao<sup>139</sup>,  
Zhen Z Zhao<sup>91</sup>, Australia and New Zealand IBDGC, Belgium IBD Genetics Consortium,  
Italian Group for IBD Genetic Consortium,  
NIDDK Inflammatory Bowel Disease Genetics Consortium, United Kingdom IBDGC,  
Wellcome Trust Case Control Consortium, Quebec IBD Genetics Consortium

<sup>1</sup>Wellcome Trust Sanger Institute, Hinxton, UK. <sup>2</sup>Department of Gastroenterology and Hepatology, University Medical Center Groningen, Groningen, The Netherlands. <sup>3</sup>Department of Genetics, University Medical Center Groningen, Groningen, The Netherlands. <sup>4</sup>Analytic and Translational Genetics Unit, Massachusetts General Hospital, Harvard Medical School, Boston, Massachusetts, USA. <sup>5</sup>Department of Medicine and Therapeutics, Institute of Digestive Disease, Chinese University of Hong Kong, Hong Kong. <sup>6</sup>Laboratory for Statistical Analysis, Center for Integrative Medical Sciences, Riken, Yokohama, Japan. <sup>7</sup>Inflammatory Bowel Disease Research Group, Addenbrooke's Hospital, Cambridge, UK. <sup>8</sup>Wellcome Trust Centre for Human Genetics, University of Oxford, Headington, UK. <sup>9</sup>Digestive Disease Research Institute, Shariati Hospital, Tehran, Iran. <sup>10</sup>Yonsei University College of Medicine, Seoul, Korea. <sup>11</sup>Icahn School of Medicine, Mount Sinai New York, New York, USA. <sup>12</sup>Department of Gastroenterology, Emam Hospital, Tehran, Iran. <sup>13</sup>Laboratory for Genotyping Development, Center for Integrative Medical Sciences, Riken, Yokohama, Japan. <sup>14</sup>IBD Unit, St Mark's Hospital, Harrow, Middlesex, UK. <sup>15</sup>National Institute of Immunology, Aruna Asaf Ali Road, New Delhi, India. <sup>16</sup>Department of Genetics, University of Delhi South Campus, New Delhi, India. <sup>17</sup>Wellcome Trust Center for Human Genetics, Oxford U.K. and Department of Biostatistics, University of Liverpool, Liverpool, UK. <sup>18</sup>Manchester Centre for Genomic Medicine, University of Manchester and Central Manchester University Hospitals NHS Foundation Trust, Manchester, UK. <sup>19</sup>Department of Medicine, Dayanand Medical College and Hospital, Ludhiana, India. <sup>20</sup>St Mary's Hospital, London, UK. <sup>21</sup>Asan Medical Center, University of Ulsan College Medicine, Seoul, Korea. <sup>22</sup>A list of members and affiliations appears in the Supplementary Note. <sup>23</sup>Department of Epidemiology, University Medical Center Groningen, Groningen, The Netherlands. <sup>24</sup>These authors contributed equally to this work. <sup>25</sup>These authors jointly supervised this work. <sup>26</sup>Digestive Disease Research Institute, Tehran University of Medical Sciences, Tehran,

Iran. <sup>27</sup>Section of Digestive Diseases, Department of Internal Medicine, Yale School of Medicine, NewHaven, Connecticut, USA. <sup>28</sup>Department of Gastroenterology and Hepatology, Digestive Disease Institute, Cleveland Clinic, Cleveland, Ohio, USA. <sup>29</sup>Department of Pathobiology, Lerner Research Institute, Cleveland Clinic, Cleveland, Ohio, USA. <sup>30</sup>Peninsula College of Medicine and Dentistry, Exeter, UK. <sup>31</sup>Department of Gastroenterology, Erasmus Hospital, Brussels, Belgium. <sup>32</sup>Department of Gastroenterology, Free University of Brussels, Brussels, Belgium. <sup>33</sup>Gastroenterology Unit, Massachusetts General Hospital, Harvard Medical School, Boston, Massachusetts, USA. <sup>34</sup>Division of Medical Sciences, Harvard Medical School, Boston, Massachusetts, USA. <sup>35</sup>Medical Department, Viborg Regional Hospital, Viborg, Denmark. <sup>36</sup>Organ Center, Hospital of Southern Jutland Aabenraa, Aabenraa, Denmark. <sup>37</sup>Inflammatory Bowel Disease Service, Department of Gastroenterology and Hepatology, Royal Adelaide Hospital, Adelaide, Australia. <sup>38</sup>Unit of Gastroenterology, Istituto di Ricovero e Cura a Carattere Scientifico-Casa Sollievo della Sofferenza (IRCCS-CSS) Hospital, San Giovanni Rotondo, Italy. <sup>39</sup>Strutture Organizzative Dipartimentali (SOD) Gastroenterologia 2, Azienda Ospedaliero Universitaria (AOU) Careggi, Florence, Italy. <sup>40</sup>Department of Gastroenterology, Hôpital Maisonneuve-Rosemont, Montréal, Québec, Canada. <sup>41</sup>Faculté de Médecine, Université de Montréal, Montréal, Québec, Canada. <sup>42</sup>Division of Gastroenterology, Hepatology and Nutrition, Department of Medicine, University of Pittsburgh School of Medicine, Pittsburgh, Pennsylvania, USA. <sup>43</sup>Center for Applied Genomics, The Children's Hospital of Philadelphia, Philadelphia, Pennsylvania, USA. <sup>44</sup>Institute of Clinical Molecular Biology, Christian-Albrechts-University, Kiel, Germany. <sup>45</sup>Department of Gastroenterology and Hepatology, Flinders Medical Centre and School of Medicine, Flinders University, Adelaide, Australia. <sup>46</sup>Department of Medicine, University of Otago, Christchurch, New Zealand. <sup>47</sup>Meyerhoff Inflammatory Bowel Disease Center, Department of medicine, Johns Hopkins University School of Medicine, Baltimore, Maryland, USA. <sup>48</sup>Department for General Internal Medicine, Christian-Albrechts-University, Kiel, Germany. <sup>49</sup>Cardiovascular Health Research Unit, University of Washington, Seattle, Washington, USA. <sup>50</sup>Division of Gastroenterology, Royal Victoria Hospital, Montréal, Québec, Canada. <sup>51</sup>Research Center, Montreal Heart Institute, Montréal, Québec, Canada. <sup>52</sup>Translational Gastroenterology Unit, John Radcliffe Hospital, Oxford, UK. <sup>53</sup>Department of Medicine II, Ludwig-Maximilians-University Hospital Munich-Grosshadern, Munich, Germany. <sup>54</sup>Department of Gastroenterology, Campus Charité Mitte, Universitätsmedizin Berlin, Berlin, Germany. <sup>55</sup>IBD unit, Fremantle Hospital, Fremantle, Australia. <sup>56</sup>School of Medicine and Pharmacology, University of Western Australia, Fremantle, Australia. <sup>57</sup>Department of Genetics, Yale School of Medicine, New Haven, Connecticut, USA. <sup>58</sup>Department of Clinical and experimental medicine, Translational Research in GastroIntestinal Disorders (TARGID), Katholieke Universiteit (KU) Leuven, Leuven, Belgium. <sup>59</sup>Department of Genetics and Genomic Sciences, Mount Sinai School of Medicine, New York, New York, USA. <sup>60</sup>Department of Gastroenterology, Sandwell and West Birmingham Hospitals NHS Trust, Birmingham, UK. <sup>61</sup>Inflammatory Bowel Diseases, Genetics and Computational Biology, Queensland Institute of Medical Research, Brisbane, Australia. <sup>62</sup>Broad Institute of MIT and Harvard, Cambridge, Massachusetts, USA. <sup>63</sup>Department of Biosciences and

Nutrition, Karolinska Institutet, Stockholm, Sweden. <sup>64</sup>IBD Center, Department of Gastroenterology, Istituto Clinico Humanitas, Milan, Italy. <sup>65</sup>Department of Gastroenterology, Tehran University of Medical Sciences, Tehran, Iran. <sup>66</sup>Department of Gastroenterology and Hepatology, Radboud University Nijmegen Medical Centre, Nijmegen, The Netherlands. <sup>67</sup>Department of Hepatology and Gastroenterology, Ghent University Hospital, Ghent, Belgium. <sup>68</sup>Center of hepatology, Gastroenterology and Dietetics, Vilnius University, Vilnius, Lithuania. <sup>69</sup>Pediatric Gastroenterology, Cincinnati Children's Hospital Medical Center, Cincinnati, Ohio, USA. <sup>70</sup>Department of Gastroenterology, Université Catholique de Louvain (UCL) Cliniques Universitaires Saint-Luc, Brussels, Belgium. <sup>71</sup>Division of Gastroenterology, University Hospital Padua, Padua, Italy. <sup>72</sup>Gastrointestinal Unit, Centre for Genomic and Experimental Medicine, Institute of Genetics and Molecular Medicine, University of Edinburgh, Edinburgh, UK. <sup>73</sup>Department of Pediatrics, Cedars Sinai Medical Center, Los Angeles, California, USA. <sup>74</sup>Department of Human Genetics, University of Pittsburgh Graduate School of Public Health, Pittsburgh, Pennsylvania, USA. <sup>75</sup>Department of Gastroenterology, Torbay Hospital, Torbay, Devon, UK. <sup>76</sup>Department of Medicine and Clinical Science, Graduate School of Medical Sciences, Kyushu University, Fukuoka, Japan. <sup>77</sup>Center for Human Genetic Research, Massachusetts General Hospital, Harvard Medical School, Boston, Massachusetts, USA. <sup>78</sup>Pediatrics, Harvard Medical School, Boston, Massachusetts, USA. <sup>79</sup>Faculty of Medical & Health Sciences, School of Medical Sciences, The University of Auckland, Auckland, New Zealand. <sup>80</sup>F.Widjaja Foundation Inflammatory Bowel and Immunobiology Research Institute, Cedars-Sinai Medical Center, Los Angeles, California, USA. <sup>81</sup>Department of Gastroenterology, Mater Health Services, Brisbane, Australia. <sup>82</sup>Department of Gastroenterology, Christchurch Hospital, Christchurch, New Zealand. <sup>83</sup>Unit of Animal Genomics, Groupe Interdisciplinaire de Génoprotéomique Appliquée (GIGA-R) Research Center, University of Liege, Liege, Belgium. <sup>84</sup>Faculty of Veterinary Medicine, University of Liege, Liege, Belgium. <sup>85</sup>Institute of Genetic Epidemiology, Helmholtz Zentrum München - German Research Center for Environmental Health, Neuherberg, Germany. <sup>86</sup>Division of Pediatric Gastroenterology, Hepatology and Nutrition, Hospital for Sick Children, Toronto, Ontario, Canada. <sup>87</sup>Department of Pediatrics, University of Utah School of Medicine, Salt Lake City, Utah, USA. <sup>88</sup>Department of Medicine, Örebro University Hospital, Örebro, Sweden. <sup>89</sup>School of Health and Medical Sciences, Örebro University, Örebro, Sweden. <sup>90</sup>Nottingham Digestive Diseases Centre, Queens Medical Centre, Nottingham, UK. <sup>91</sup>Molecular Epidemiology, Genetics and Computational Biology, Queensland Institute of Medical Research, Brisbane, Australia. <sup>92</sup>Child Life and Health, University of Edinburgh, Edinburgh, Scotland, UK. <sup>93</sup>Gastrointestinal Research Group, Division of Applied Medicine, University of Aberdeen, Aberdeen, UK. <sup>94</sup>Division of Rheumatology Immunology and Allergy, Brigham and Women's Hospital, Boston, Massachusetts, USA. <sup>95</sup>Academy of Medicine, Lithuanian University of Health Sciences, Kaunas, Lithuania. <sup>96</sup>Research Institute of Internal Medicine, Department of Transplantation Medicine, Division of Cancer, Surgery and Transplantation, Oslo University Hospital Rikshospitalet, Oslo, Norway. <sup>97</sup>Norwegian PSC Research Center, Department of Transplantation Medicine, Division of Cancer, Surgery and Transplantation, Oslo University Hospital Rikshospitalet,



Oslo, Norway. <sup>98</sup>K.G. Jebsen Inflammation Research Centre, Institute of Clinical Medicine, University of Oslo, Oslo, Norway. <sup>99</sup>IBD center, Tokyo Yamate Medical Center, Tokyo, Japan. <sup>100</sup>Department of Pediatrics, Emory University School of Medicine, Atlanta, Georgia, USA. <sup>101</sup>Department of Gastroenterology, Kaunas University of Medicine, Kaunas, Lithuania. <sup>102</sup>Institute of Cellular Medicine, Newcastle University, Newcastle-upon-Tyne, UK. <sup>103</sup>Faculty of medicine, University of Latvia, Riga, Latvia. <sup>104</sup>Dipartimento di Neuroscienze, Psicologia, Area del Farmaco e Salute del Bambino (NEUROFARBA), Università di Firenze Strutture Organizzative Dipartimentali (SOD) Gastroenterologia e Nutrizione Ospedale pediatrico Meyer, Firenze, Italy. <sup>105</sup>Division of Gastroenterology, Centre Hospitalier Universitaire (CHU) de Liège, Liege, Belgium. <sup>106</sup>Department of Gastroenterology, The Townsville Hospital, Townsville, Australia. <sup>107</sup>Department of Gastroenterology & Hepatology, Royal Victoria Infirmary, Newcastle-upon-Tyne, UK. <sup>108</sup>Department of Medical and Molecular Genetics, King's College London School of Medicine, Guy's Hospital, London, UK. <sup>109</sup>Department of Gastroenterology, Fukuoka University Chikushi Hospital, Fukuoka, Japan. <sup>110</sup>Inflammatory Bowel Disease Centre, Mount Sinai Hospital, Toronto, Ontario, Canada. <sup>111</sup>Center for Human Molecular Genetics and Pharmacogenomics, Faculty of Medicine, University of Maribor, Maribor, Slovenia. <sup>112</sup>Department of Gastroenterology, Sapporo-Kosei General Hospital, Sapporo, Japan. <sup>113</sup>Department of Medicine, Ninewells Hospital and Medical School, Dundee, UK. <sup>114</sup>Center for Computational and Integrative Biology, Massachusetts General Hospital, Harvard Medical School, Boston, Massachusetts, USA. <sup>115</sup>Department of Genomics Life & Brain Center, University Hospital Bonn, Bonn, Germany. <sup>116</sup>Department of Gastroenterology, Academic Medical Center, Amsterdam, The Netherlands. <sup>117</sup>Faculty for Chemistry and Chemical Engineering, University of Maribor, Maribor, Slovenia. <sup>118</sup>Department of Gastroenterology, Royal Brisbane and Womens Hospital, Brisbane, Australia. <sup>119</sup>Department of Gastroenterology, Université Catholique de Louvain (UCL) Centre Hospitalier Universitaire (CHU) Mont-Godinne, Mont-Godinne, Belgium. <sup>120</sup>Paediatric Gastroenterology and Nutrition, Royal Hospital for Sick Children, Edinburgh, UK. <sup>121</sup>Department of Gastroenterology, St Thomas Hospital, London, UK. <sup>122</sup>Department of Digestive Diseases, Hospital Quiron Teknon, Barcelona, Spain. <sup>123</sup>Department of Public Health Sciences, University of Chicago, Chicago, Illinois, USA. <sup>124</sup>Human Genetics, Genome Institute of Singapore, Singapore. <sup>125</sup>Institute for Human Genetics, University of California, San Francisco, San Francisco, California, USA. <sup>126</sup>Department of Gastroenterology, Dayanand Medical College and Hospital, Ludhiana, India. <sup>127</sup>Department of Biology of Radiations and Human Health, Agenzia nazionale per le nuove tecnologie l'energia e lo sviluppo economico sostenibile (ENEA), Rome, Italy. <sup>128</sup>Department of Internal Medicine, Faculty of Medicine, Toho University, Chiba, Japan. <sup>129</sup>Department of Medicine, Division of Gastroenterology, Tokyo Yamate Medical Center, Tokyo, Japan. <sup>130</sup>Department of Clinical Science Intervention and Technology, Karolinska Institutet, Stockholm, Sweden. <sup>131</sup>Gastroenterology & General Medicine, Norfolk and Norwich University Hospital, Norwich, UK. <sup>132</sup>Translational Gastroenterology Unit, Nuffield Department of Clinical Medicine and Children's Hospital, John Radcliffe Hospital, Oxford, UK. <sup>133</sup>Department of Gastroenterology, Leiden University Medical Center, Leiden, The Netherlands. <sup>134</sup>Division of Gastroenterology, University Hospital

Gasthuisberg, Leuven, Belgium. <sup>135</sup>Faculty of medicine, University of Toronto, Toronto, Ontario, Canada. <sup>136</sup>Department of Computer Science, New Jersey Institute of Technology, Newark, New Jersey, USA. <sup>137</sup>Institute of Human Genetics, Technische Universität München, Munich, Germany. <sup>138</sup>Department of Neurology, Technische Universität München, Munich, Germany. <sup>139</sup>Department of Biostatistics, School of Public Health, Yale University, NewHaven, Connecticut, USA. <sup>140</sup>Department of Gastroenterology, West China Hospital, Chengdu, Sichuan, China. <sup>141</sup>State Key Laboratory of Biotherapy, Sichuan University West China University of Medical Sciences (WCUMS), Chengdu, Sichuan, China.

### **Supplementary information**

#### **Members of the International Multiple Sclerosis Genetics Consortium**

The International Multiple Sclerosis Genetics Consortium is a collaboration of investigators from 27 research groups, represented by the following investigators:

Maria Ban Sergio Baranzini ,Lisa Barcellos, Luisa Bernardinelli ,David Booth , Dorothea , Buck, Elizabeth Celius, Manuel Comabella, Alastair Compston, Chris Cotsapas , Sandra D'Alfonso, Phil De Jager, Bénédicte Dubois, Bertrand Fontaine , An Goris , Pierre-Antoine ,ourraud,Georgios Hadjigeorgiou,,David Hafler,Jonathan Haines ,Hanne Harbo ,Steve Hauser,Eva Havrdova, Clive Hawkins , Bernhard Hemmer , Jan Hillert , Rogier Hintzen , Adrian Ivinson, Jun-ichi Kira, Ingrid Kockum , Christina Lill, Roland Martin, Filippo Martinelli-Boneschi , Jacob McCauley , Jorge Oksenberg , Tomas Olsson , Annette Oturai , Aarno Palotie , Margaret Pericak-Vance , Nikolaos Patsopoulos , Isabelle Rebeix, Janna Saarela , Stephen Sawcer , Finn Sellebjerg, Graeme Stewart, Helle Bach Søndergaard, Anne Spurkland, Bruce Taylor, Frauke Zipp
